# Supplementary material
Source: MDPI journal article supplement (https://www.mdpi.com/2571-9408/7/5/125)
Supplement: s1 [file s1]

## Article

# Objetos de *barniz de Pasto* del siglo XVII de la colección de la Hispanic Society Museum and Library: materialidad y tecnología

Elena Basso <sup>1,\*</sup>, Alicia McGeachy <sup>1</sup>, Maria Goretti Mieites Alonso <sup>1</sup>, Federica Pozzi <sup>2</sup>, Roxanne Radpour <sup>3</sup> and Monica Katz <sup>4</sup>

<sup>1</sup>. Department of Scientific Research, The Metropolitan Museum of Art, 1000 Fifth Avenue, New York, NY 10028, USA; elena.basso@metmuseum.org; alicia.mcgeachy@metmuseum.org (M.A.C.); maria.mieitesalonso@metmuseum.org (M.A.M.G.)

<sup>2</sup>. Centro per la Conservazione ed il Restauro dei Beni Culturali “La Venaria Reale”, via XX Settembre 18, Venaria Reale, 10078 Turin, Italy; federica.pozzi@ccrvenaria.it

<sup>3</sup>. Department of Art Conservation, University of Delaware, 303 Old College, Newark, DE 19716, USA; radpour@udel.edu

<sup>4</sup>. Conservator Emerita, Hispanic Society Museum & Library, 613 W 155th Street, New York, NY 10032, USA; monicakatz@mac.com

\* Correspondence: elena.basso@metmuseum.org

**Resumen:** La Hispanic Society Museum and Library (HSML) posee una colección de nueve objetos virreinales de *barniz de Pasto*, hechos por artesanos indígenas en los siglos XVII y XVIII. Diseñado para imitar las lacas asiáticas y destinado a los gustos estéticos europeos, el *barniz de Pasto* es un ejemplo de la técnica y los conocimientos indígenas que han sobrevivido hasta nuestros días. Se llevó a cabo un análisis en profundidad de cinco de estos objetos de *barniz de Pasto*, fechados en la primera mitad y último cuarto del siglo XVII en función de su iconografía, mediante una combinación de técnicas no invasivas y microinvasivas, incluida la espectroscopía de fluorescencia de rayos X (pXRF) para investigar la posible presencia de pigmentos inorgánicos y la espectroscopía de reflectancia de fibra óptica (FORS) y la espectroscopía de imágenes de reflectancia (RIS) para proporcionar información molecular sobre los colorantes y sus distribuciones en los objetos. Los colorantes y pigmentos se identificaron mediante espectroscopía Raman, espectroscopía infrarroja por transformada de Fourier (FTIR) y cromatografía líquida y espectrometría de masas (LC/MS). La naturaleza de la resina se determinó mediante FTIR y pirólisis con cromatografía de gases y espectrometría de masas (Py-GC/MS), mientras que la estratigrafía de decoración y la composición se analizaron mediante microscopía electrónica de barrido con espectroscopía de rayos X de dispersión de energía (MEB-EDX) para comprender las técnicas de trabajo. Este artículo confirma el uso de *mopa mopa*, la resina utilizada en la técnica del *barniz de Pasto*, en dos objetos no analizados previamente, e identifica índigo, rojo a base de insectos, calomelano, blanco de plomo y un tinte amarillo desconocido con base de flavonol, y cuestiona el uso de calomelano como marcador temporal para estos trabajos. En conjunto, estos resultados amplían nuestra comprensión del uso de materiales y las exploraciones realizadas por los artistas durante este período para crear objetos tan elaborados y duraderos.

**Palabras clave:** *barniz de Pasto*; *Elaeagia pastoensis*; *mopa mopa*; laca; Colombia; Virreinal; arte Indígena; pXRF; espectrometría de masas; espectroscopía de imagen de reflectancia.

## 1. Introducción

En los siglos XVII y XVIII, los artesanos que trabajaban en Pasto, Colombia, se hicieron famosos por crear objetos lacados conocidos como *barniz de Pasto* utilizando técnicas Indígenas [1,2]. Estas piezas de madera decoradas estaban destinadas a imitar las lacas asiáticas, incorporando al mismo tiempo elementos y formas decorativas indígenas y europeas [3], y estaban dirigidas a la nobleza local y a los miembros del clero [4]. La

**Citation:** Basso, E.; McGeachy, A.C.; Mieites Alonso, M.G.; Pozzi, F.; Radpour, R.; Katz, M. Objetos de *barniz de Pasto* del siglo XVII de la colección de la Hispanic Society Museum and Library: materialidad y tecnología. *Heritage* **2024**, *5*, x.

<https://doi.org/10.3390/xxxxx>

Academic Editors: Nicola Masini, Austin Nevin

Received: 7 April 2024

Revised: 7 May 2024

Accepted: 15 May 2024

Published: date

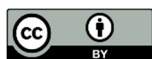

**Copyright:** © 2024 by the authors. Submitted for possible open access publication under the terms and conditions of the Creative Commons Attribution (CC BY) license (<https://creativecommons.org/licenses/by/4.0/>).

---

práctica continúa hoy en día y en 2020 fue incluida en la Lista del Patrimonio Cultural Inmaterial que requiere medidas urgentes de salvaguardia de la UNESCO. El presente estudio comprende un grupo de cinco objetos en *barniz de Pasto* que pertenecen a la colección de la Hispanic Society Museum and Library (HSML) de Nueva York. En este grupo de objetos están representados dos tipos de técnicas decorativas que surgieron en el siglo XVII: el *barniz mate*, que se crea mediante el uso de resinas saturadas de pigmentos para conseguir una apariencia mate, y el *barniz brillante*, que consiste en colocar capas de láminas de resina tintadas y translúcidas sobre pan de plata para crear un efecto brillante [3,5].

La resina, conocida como *mopa mopa*, se produce mediante la cosecha de pequeños brotes de hojas resinosas llamadas estípulas de *Elaeagia pastoensis*, un árbol que crece en la selva tropical andina. Newman y sus coautores informan de una descripción exhaustiva y un estudio analítico de *E. pastoensis* y *E. utilis*, las otras especies conocidas de *Elaeagia* productoras de resina [6,7]. Aunque el término *mopa mopa* se usa generalmente para referirse a las resinas de *Elaeagia*, en este artículo se usa exclusivamente para indicar *E. pastoensis*. El proceso de preparación tradicional requería purificar la resina de los restos vegetales hirviéndola en agua y masticándola para mejorar las propiedades elásticas y plásticas [8]. Una vez purificada, la resina se coloreaba mezclándola con pigmentos y tintes naturales y luego se estiraba en láminas muy finas, que se colocaban sobre la superficie del objeto con pan de plata y/o incrustaciones para crear diseños complejos y sofisticados. La resina creaba un acabado lustroso similar al de la laca asiática y, cuando se cubría con pan de plata, trataba de imitar la laca *makie* japonesa, que se espolvoreaba con polvo de oro [9].

Algunos trabajos recientes han sido adiciones bienvenidas a la evaluación histórica del arte del *barniz de Pasto* [10-16], mientras que se han publicado varios estudios científicos a raíz de la investigación realizada por Burgio y sus coautores [17]. Entre ellos destaca el Número Especial en 2020 de los *Anales del Museo de América* que siguió a la jornada de estudio centrada en gran medida en los objetos de *barniz de Pasto* en colecciones españolas y en el Victoria and Albert Museum (V&A) de Londres. En esta edición, Romero y sus coautores presentaron los resultados del análisis de materiales de cinco cajas decoradas con *barniz de Pasto* en colecciones españolas [18]. Los autores confirmaron la presencia de una capa de resina molida junto con blanco de plomo en una caja *barniz mate* donde el color negro de fondo estaba compuesto de índigo mezclado con otros compuestos; en dos cajas decoradas con la técnica *brillante*, los autores descubrieron que el pan de plata está sellado y protegido por una resina de acabado transparente rica en aceite, posiblemente aceite de chía [18]. Resultados similares encontró Sánchez Ledesma [19] en cinco micromuestras tomadas de una gran arqueta de *barniz de Pasto* en la colección del Museo de América. Utilizando técnicas analíticas como la cromatografía líquida de alta resolución con detector de diodos en serie (HPLC-DAD) y la espectroscopía infrarroja por transformada de Fourier (FTIR), Sánchez Ledesma confirmó que la resina era *E. pastoensis*. El calomel (cloruro de mercurio (I)), también conocido como blanco de mercurio, fue el pigmento blanco mate identificado mediante microscopía electrónica de barrido equipada con espectroscopía de dispersión de energía de rayos X (MEB-EDX), mientras que el índigo se detectó mediante HPLC-DAD en los verdes y negros. Desafortunadamente, los componentes orgánicos amarillos y rojos permanecieron sin identificar [19].

Crippa y sus coautores [20] identificaron el calomel utilizando un espectrómetro Raman portátil en dos obras de arte del Museo Fitzwilliam de Cambridge: un misal inglés (MS34, ca. 1470) y un retrato de Isaac Oliver de Inglaterra (FM 3868, 1595-1600), lo que abre la posibilidad de que el calomel se utilice como pigmento de forma más amplia en las obras de arte y antes de su aparición en los objetos de *barniz de Pasto*. En el artículo de Gliozzo sobre los pigmentos rojos y blancos a base de mercurio [21], la autora plantea la posibilidad de que el calomel se haya obtenido como un subproducto de degradación del cinabrio, ampliamente utilizado y encontrado en el Virreinato del Perú antes del siglo XVII.

El presente trabajo se basa en el estudio de un jarrón de calabaza lacado con *barniz brillante*, también en la colección del HSML, que fue objeto de un estudio analítico integral con el objetivo de identificar todos los materiales implicados en su decoración, investigar la técnica de fabricación, así como datar el objeto [22]. El estudio confirmó que la resina era *E. pastoensis* e identificó el uso de colorante a base de indigotina para los colores negro y azul, cochinilla para el rojo, calomel para el blanco y una mezcla de colorante a base de indigotina y un colorante amarillo no identificado para el verde. La compleja estratigrafía incluía una o dos capas de pan de plata, cada una debajo de una capa de resina tintada, creando un efecto iridiscente típico. El cuerpo de la calabaza fue datado por radiocarbono, lo que respalda un estudio iconográfico inicial que había atribuido al jarrón una fecha de alrededor de 1625.

Utilizando un enfoque similar y una variedad de técnicas analíticas, este estudio examina otros cinco objetos de *barniz de Pasto* de la colección HSML cuya iconografía data de principios a finales del siglo XVII. El objetivo del presente estudio fue confirmar el uso de *E. pastoensis* como resina, identificar pigmentos y colorantes y buscar evidencias de cambios materiales y tecnológicos a lo largo del siglo XVII. Por último, mediante el examen de objetos decorados tanto en *barniz mate* como en *barniz brillante*, se pudieron evaluar las diferencias en el uso de tintes y pigmentos en las dos técnicas. Este trabajo aporta valiosos conocimientos sobre la tecnología de estos procesos decorativos, cultural y artísticamente importantes, y genera nuevas preguntas sobre los tintes amarillos utilizados en la producción de resinas coloreadas y el uso de pigmentos como marcadores cronológicos en estas obras.

## 2. Materiales y métodos

### 2.1. Los objetos

En el estudio analítico se incluyeron los siguientes objetos de *barniz de Pasto*: una *Arqueta* (LS2361, 1625-1650), un *Escritorio portátil* (LS2446, h. 1643), un *Tablero de mesa* (LS2447, h. 1643), un *Cofre* (LS2067, h. 1650) y otro *Escritorio portátil* (LS2000, h. 1684) (Figura 1).

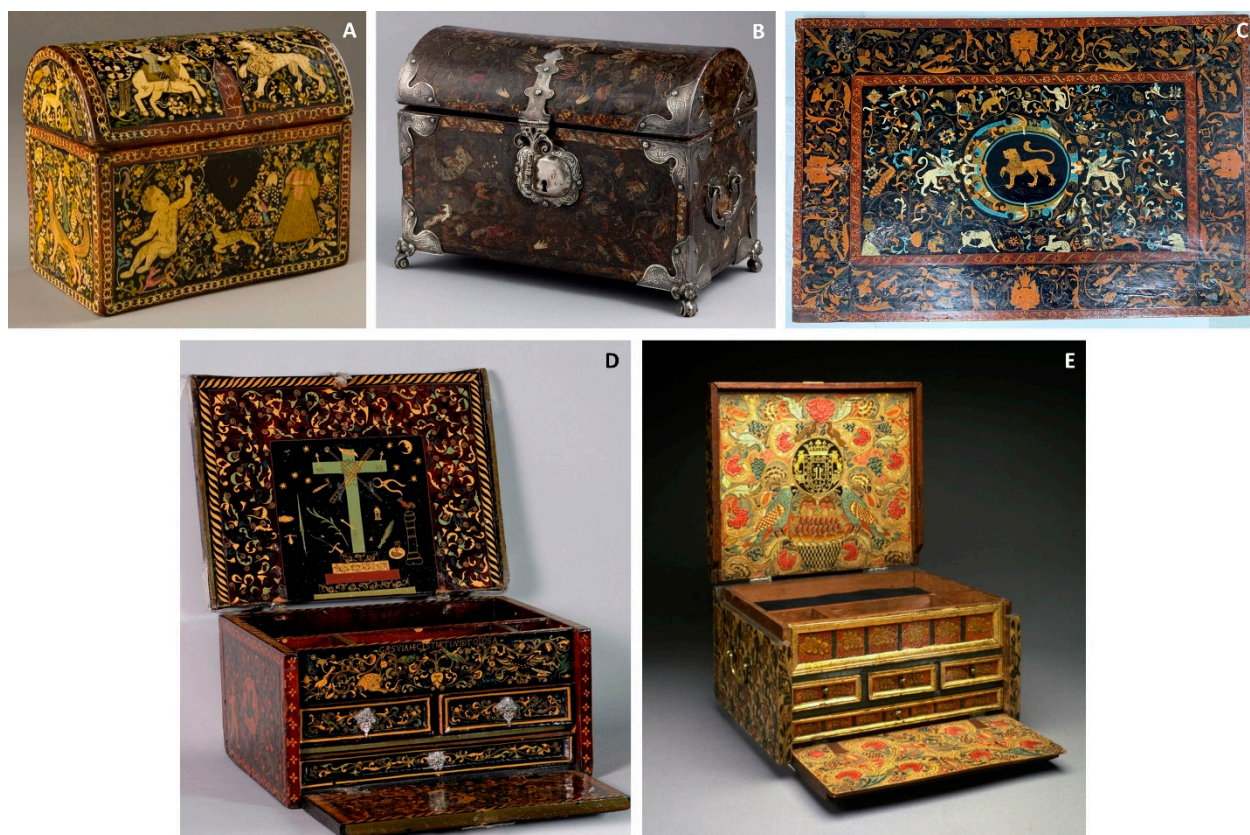



**Figura 1.** Imágenes de los cinco objetos de *barniz de Pasto* estudiados para esta investigación. (A) *Arqueta*, LS2361. (B) *Cofre*, LS2067. (C) *Tablero de mesa*, LS2447. (D) *Escritorio portátil*, LS2446. (E) *Escritorio portátil*, LS2000. Cortesía de la Hispanic Society of America (los detalles sobre los objetos se informan en la Tabla S1 de Material Suplementario S1).

Las cinco obras de arte se dividieron en dos grupos en función de su forma, tamaño relativo y datación. El primer grupo incluye la *Arqueta* (LS2361) y el *Cofre* (LS2067) (Figura 1A-B), similares en cuanto a estructura, tamaño y fecha a pesar de haber sido realizados con técnicas decorativas diferentes. Presentan la misma estructura básica de madera con soportes de tapa interior arqueados y una tapa abovedada. A excepción del fondo, que está inacabado, todas las superficies, interiores y exteriores, están cubiertas de resina (Figura 2). Dentro de la banda translúcida rojiza que enmarca cada uno de los paneles exteriores de la *Arqueta* (LS2361), las figuras más grandes de un querubín, una dama española y un hombre a caballo, y animales -ciervos, leones, perros- están rodeados de flora y fauna sobre un fondo negro y contienen la siguiente paleta limitada: varios tonos de ocre, rosa, azul pálido y oscuro, verde claro, verde oliva y gris. Esta técnica incrusta formas lacadas de diferentes colores para crear el diseño o, en el caso de la liebre grisácea, recorta la resina para revelar detalles en negro (Figura 3).

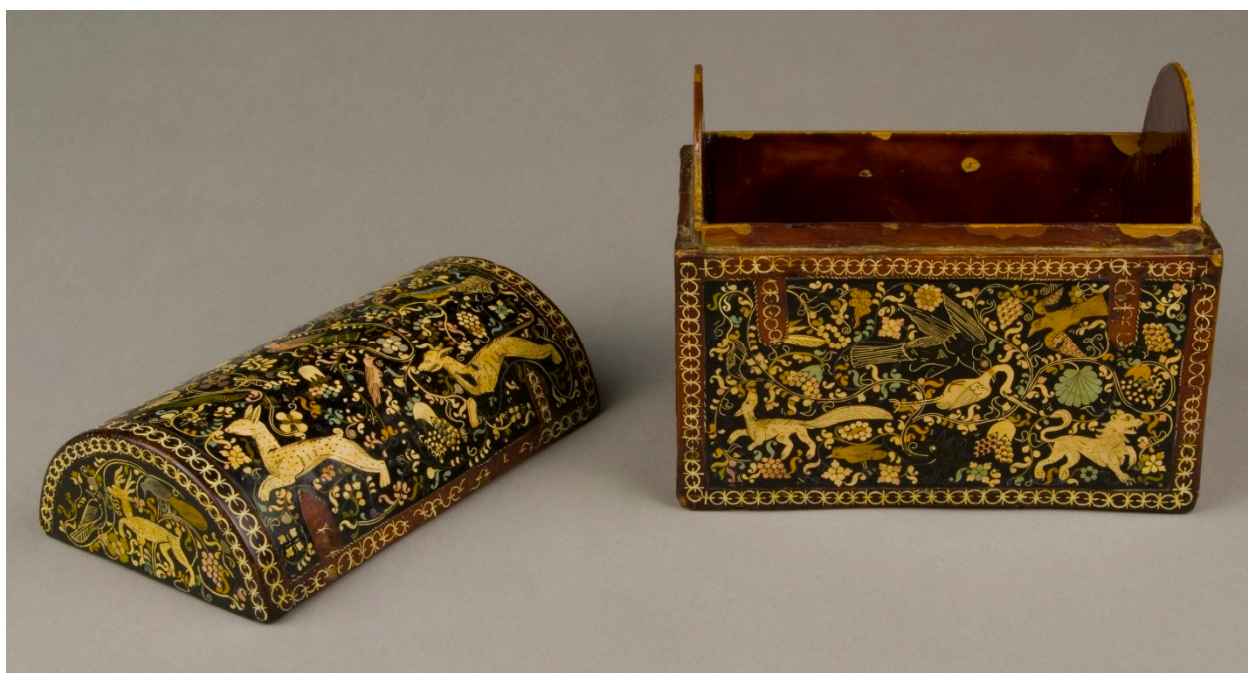

**Figura 2.** *Arqueta*, LS2361. La imagen muestra la estructura de la arqueta y la extensión de las superficies decoradas.



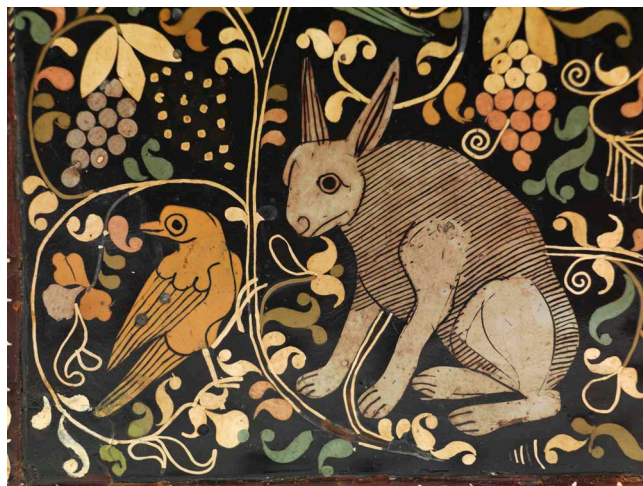

**Figura 3.** Detalle del lado izquierdo de la *Arqueta*, LS2361, que muestra una liebre azul grisácea pálida.

El *Cofre* (LS2067), una caja *brillante*, conserva sus herrajes originales de plata y, al igual que los otros objetos examinados aquí, tiene todas las superficies visibles cubiertas de resina, excepto el fondo. Las imágenes se remontan a los libros de horas medievales con un unicornio y criaturas marinas fantásticas (Figura 4) representadas en resina tintada en capas sobre pan de plata, y detalles seleccionados en resina blanca y negra saturada. La paleta más limitada de esta caja tiene un fondo oscuro con diseños de color naranja, rojo y crema con motivos de manos *barniz mate* bastante inusuales que, curiosamente, solo se han observado antes en frascos *barniz de Pasto* pertenecientes al V&A [23]. La mayoría de los detalles más finos de esta caja están oscurecidos por la oxidación de la hoja de plata (Figura 5).

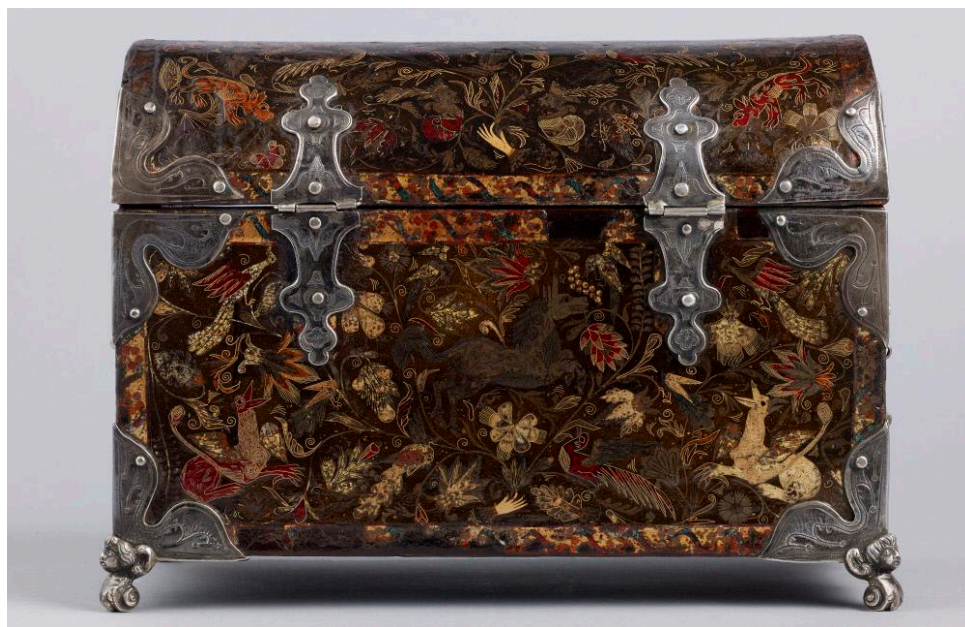

**Figura 4.** Parte posterior del *Cofre* (LS2067), que muestra un unicornio en el centro rodeado de otras criaturas fantásticas y flora.

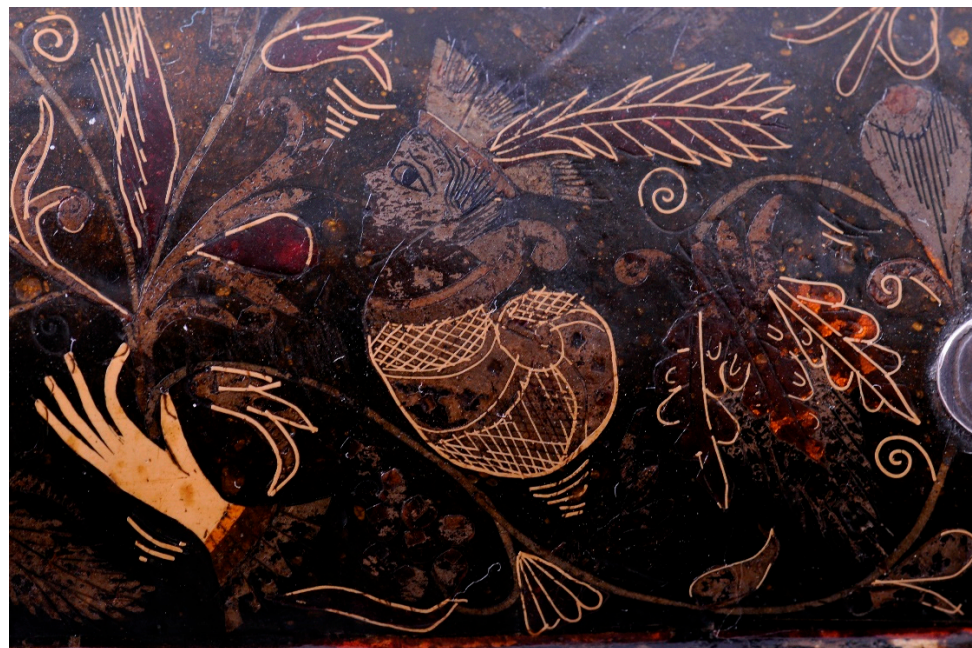

**Figure 5.** Ejemplo de la oxidación de la plata en la parte superior del cuerpo y la cabeza de un 'hombre caracol'. Cofre, LS2067.

El segundo grupo de objetos está formado por dos escritorios, uno decorado con la técnica *barniz mate* (LS2446) y el otro decorado con *barniz brillante* (LS2000) (Figura 1D-E). El *Escritorio en barniz mate* (LS2446) es una caja de escritura con tres cajones decorados con una técnica similar a la de la *Arqueta* (LS2361), con incrustaciones de resina tinta que componen el diseño. El *Escritorio* tiene un fondo negro y rojo oscuro con detalles decorativos en azul, verde, amarillo, rojo y negro. La inscripción justo encima de los cajones identifica al propietario original: "CAPSULA H(A)EC EST MARTINI DE TOLOSA" (Figura 6), que significa "esta caja pertenece a Martín de Tolosa". La imaginería religiosa en el interior de la tapa contiene pistas sobre su ocupación: la investigación de archivo ha identificado a Martín de Tolosa como sacristán mayor y maestro de capilla de la Catedral de Popayán desde al menos 1630 hasta 1643, por lo que a la caja se le dio una fecha de alrededor de 1643. Entre las decoraciones foliadas se ilustran animales europeos y sudamericanos. Estos incluyen una *amaruca*, un dragón de la mitología andina en el panel posterior y figuras, incluyendo posiblemente un retrato del propietario de la caja, Martín de Tolosa [24].

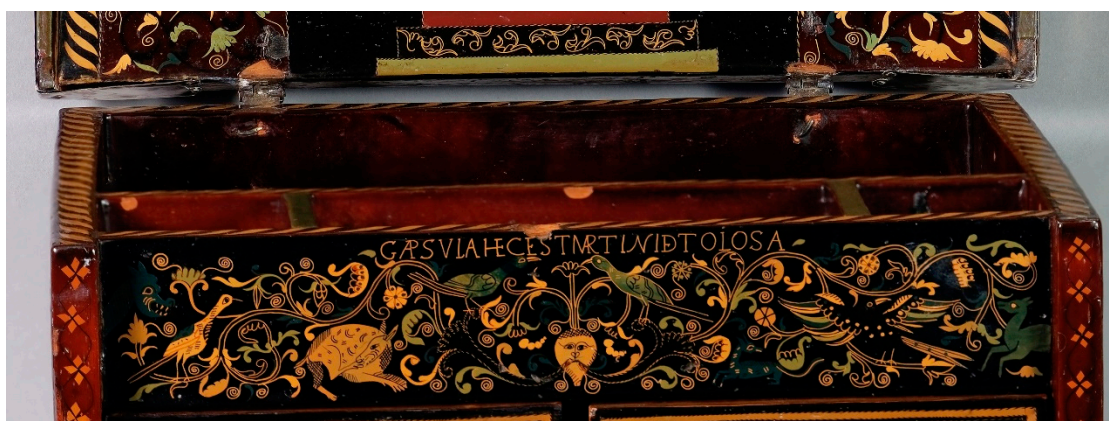

**Figura 6.** Detalle de la inscripción del propietario del *Escritorio*, LS2446.

El *Tablero de mesa en barniz mate* (LS2447) (Figura 1C) se incluye en este grupo porque fue adquirido con el *Escritorio en barniz mate* (LS2446) y se supone que formaba parte del



soporte de mesa del *Escritorio*. De hecho, los dos objetos comparten una paleta de colores similar, particularmente en el amplio borde decorativo exterior que se encuentra entre dos bandas rojas de encuadre con detalles repetidos de flores y volutas. El reverso del *Tablero de mesa* está inacabado y presenta evidencia de la falta de patas de caballete, lo que concordaría con la fecha de hacia 1643. Sin embargo, el *Tablero de mesa* contiene la menor cantidad de imágenes obviamente indígenas de todas las piezas de *barniz de Pasto* de HSML. El diseño central (Figura 7) tiene una paleta más vibrante e incluye decoraciones azules y blancas. El cartucho central, orientado lateralmente, tiene un león en el centro con dos grifos a los lados. Los pájaros son estilizados, pero podrían ser pavos reales y loros, y hay un mono blanco sobre el cartucho.

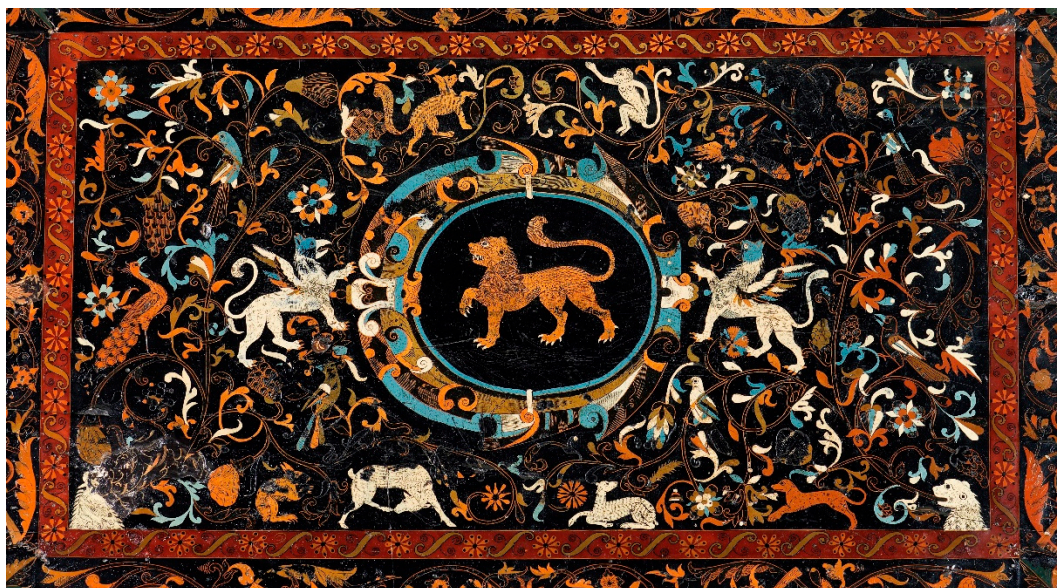

**Figura 7.** Detalle del cartucho central del *Tablero de mesa*, LS2447.

El último objeto perteneciente a este grupo es el *Escritorio* en *barniz brillante* (LS2000), también de frente caído, pero con cuatro cajones (Figura 1E). Este *Escritorio*, objeto de un estudio previo centrado en aspectos históricos y técnicos [16], tiene la mayor variedad de tonalidades en colores: rojos, naranjas y amarillos translúcidos para dar la ilusión de dorados, verdes y azules, todo ello en capas sobre pan de plata finamente batido con detalles resaltados en negro. El exterior de la caja está decorado con un diseño en relieve repetitivo de enredaderas de flores de maracuyá y monos sobre un fondo crema; el interior de la tapa de la caja y el frente abatible revelan flores y frutas de colores vibrantes en una canasta y el escudo de la familia Quirós flanqueado por loros (Figura 8). El escudo indica que el *Escritorio* fue un regalo del obispo de Popayán a su hermano, nombrado marqués de Monreal en 1683 [3]. Los herrajes no son originales, ya que han sido sustituidos por latón moderno liso, pero la huella del original es aún visible en forma de una antigua reparación del *barniz de Pasto*. La forma de la caja, con los laterales y la tapa ligeramente bombé, muestra un aspecto más asiático en comparación con el *Escritorio* en *barniz mate*, aunque tiene un fondo de laca blanca mate, mientras que en las lacas asiáticas era típicamente negro o rojo. A finales del siglo XVII, los artesanos de las Américas españolas estaban incorporando muchas influencias de diseño diferentes. Aunque no hay pruebas documentales directas que confirmen la fabricación de los objetos, las fechas de las dos cajas de escritura estaban respaldadas por detalles en su diseño y estudio iconográfico. La comparación visual con la calabaza HSML (LS2400) [22], que tiene un rango de fechas verificado, también fue informativa.



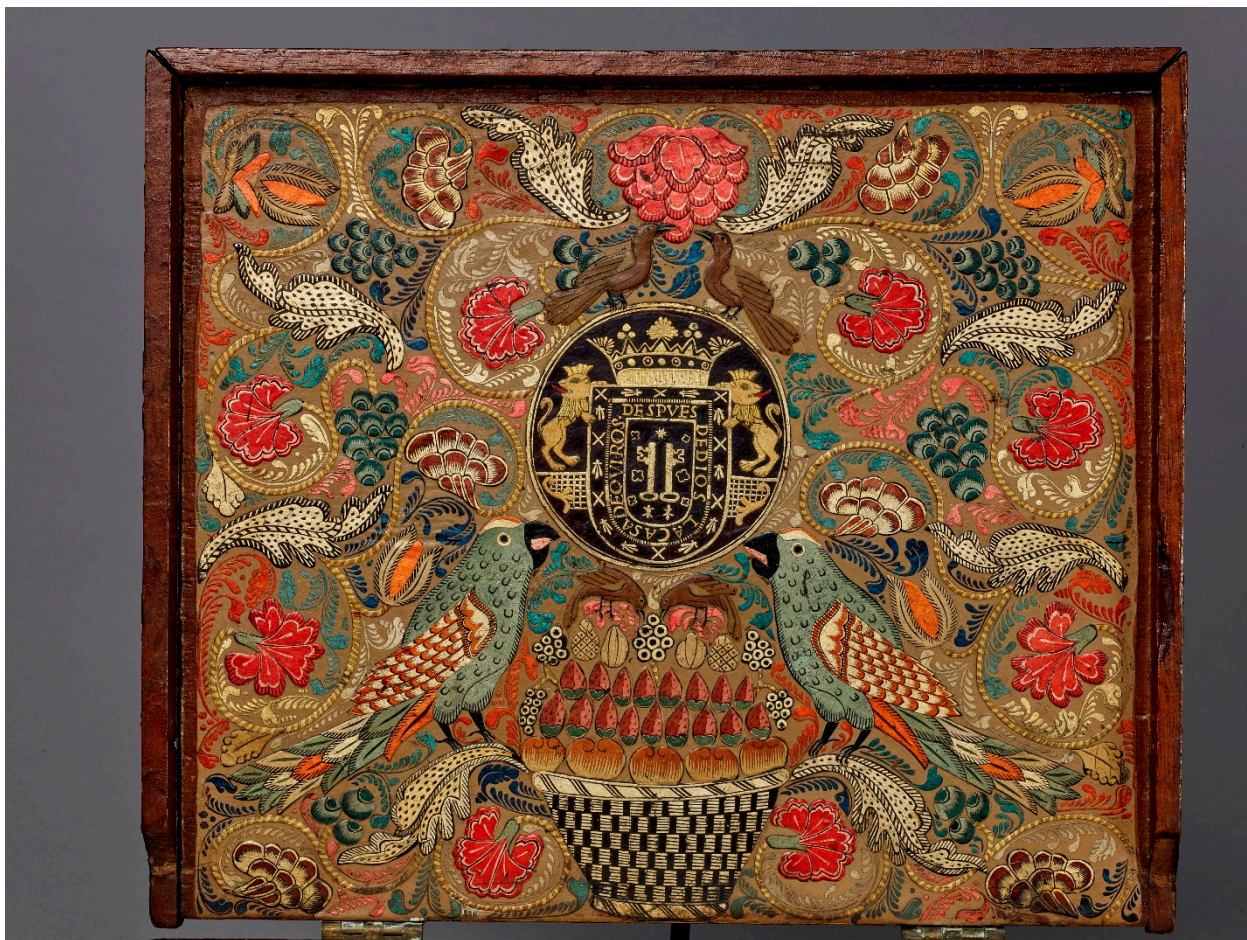

**Figura 8.** Tapa interior del *Escritorio portátil*, LS2000.

Al igual que la gran mayoría de los objetos de *barniz de Pasto* existentes, las formas de estos dos grupos son todos tipos de muebles de estilo europeo, desconocidos en las Américas antes de la colonización española. La resina de los cinco objetos muestra un patrón de envejecimiento similar, con un craquelado mínimo y, por lo general, cuando ocurren, pérdidas en esquinas expuestas, bordes y juntas de construcción. La resina en sí misma tiene propiedades físicas inusuales que contribuyen a su preservación en objetos de arte [25].

## 2.2. Enfoque analítico

Inicialmente, se realizó una primera campaña de análisis no invasivos que incluyó espectroscopía portátil de fluorescencia de rayos X (pXRF), espectroscopía de reflectancia de fibra óptica (FORS) y espectroscopía de imágenes de reflectancia (RIS) seguida de la recogida de 7 micromuestras representativas (Tabla 1).

Se extrajeron muestras de dos de los cinco objetos (LS2447 y LS2000) con un bisturí quirúrgico, bajo un examen minucioso y una selección de ubicación bajo un microscopio estereoscópico. Se produjeron secciones transversales y raspados de áreas de colores representativos. Las secciones transversales se inspeccionaron primero mediante microscopía óptica de luz polarizada y ultravioleta (UV), luego mediante microscopía electrónica de barrido equipada con espectroscopía de dispersión de energía de rayos X (MEB-EDX). Las muestras sueltas se analizaron mediante espectroscopía Raman, espectroscopía FTIR, pirólisis de cromatografía de gases y espectrometría de masas (py-GC/MS) y cromatografía líquida y espectrometría de masas (LC/MS).

**Tabla 1.** Lista de micromuestras extraídas de LS2447 y LS2000.

| Muestra | Objeto | Descripción                               | Ubicación                                                                                                               |
|---------|--------|-------------------------------------------|-------------------------------------------------------------------------------------------------------------------------|
| S1      |        | Sección transversal de un área azul claro | Área de un pétalo azul claro de una flor a la izquierda del pavo real                                                   |
| S2      |        | Raspado de decoración naranja             | Área de hoja de naranja en la parte inferior de la vista de mesa                                                        |
| S3      |        | Raspado de decoración verde oliva         | Área de decoración de flores verde-olivo en la parte superior del grifo a la izquierda del león                         |
| S4      | LS2447 | Raspado de decoración blanca              | Área de decoración de flores blancas junto a la esquina superior izquierda del rectángulo interior                      |
| S5      |        | Raspado de resina                         | Área de resina (posiblemente sin tinta) de un área fracturada en el borde inferior izquierdo del <i>Tablero de mesa</i> |
| S6      |        | Raspado de decoración negra               | Área de fondo negro de la esquina superior izquierda del <i>Tablero de mesa</i>                                         |
| S1      | LS2000 | Sección transversal de un área amarilla   | Área de pétalo amarillo de una flor fracturada en la parte inferior en el lado exterior izquierdo                       |

#### 2.2.1. Preparación de las secciones transversales

Las secciones transversales se prepararon mediante la inclusión de cada muestra dentro de una doble capa de resina de metacrilato de metilo (Technovit® 2000 LC, Kulzer Technik, Hanau, Germany). Cada capa de resina se curó bajo luz UV durante 20 min. El exceso de resina se lijó y la superficie se pulió finamente utilizando CarbiMet 2 y papel abrasivo Micro-mesh de varios granos para exponer la estratigrafía de las muestras.

#### 2.2.2. Espectroscopía Raman

El análisis microinvasivo se realizó utilizando un espectrómetro Raman Bruker Senterra equipado con un objetivo de microscopio de larga distancia de trabajo Olympus 50x y un detector de dispositivo de carga acoplada (CCD). Se utilizaron como fuentes de excitación un láser de estado sólido cian de Spectra Physics y un láser de diodo de onda continua que emitía a 488 y 785 nm, respectivamente, y dos rejillas holográficas (1800 y 1200 rayas/mm) proporcionaron una resolución espectral de 3-5 cm<sup>-1</sup>. La potencia del láser de salida, el número de escaneos y el tiempo de integración se ajustaron de acuerdo con la respuesta Raman de las diferentes muestras. Los espectros se interpretaron comparándolos con las bases de datos de las bibliotecas del Metropolitan Museum of Art y con la literatura publicada, como se explica más adelante.

#### 2.2.3. pXRF

Las mediciones espectroscópicas de XRF de un solo punto se recogieron con un espectrómetro XRF portátil de dispersión de energía Bruker Elio XGLab, con un detector de deriva de silicio (SDD) de gran área y alta resolución con 130 eV en manganeso (Mn) K $\alpha$  con una tasa de fotones de entrada de 10 kcps (modo de alta resolución) y 170 eV en Mn K $\alpha$  con una velocidad de fotones de entrada de 200 kcps (modo rápido). El sistema está equipado con filtros intercambiables y un objetivo de transmisión de rodio (Rh) con un voltaje máximo de 50 kV y una potencia máxima de 4 W. Los parámetros empleados para los escaneos fueron un voltaje de 40 kV, una corriente de 80  $\mu$ A, un tiempo en directo de 60 s y un tamaño de punto de 1 mm.

#### 2.2.4. MEB-EDX

---

Los análisis de las secciones transversales se realizaron con un Zeiss Sigma HD FE-SEM, equipado con un detector Oxford Instrument X-MaxN 80 SDD. Se llevaron a cabo imágenes de electrones retrodispersados (BSE), análisis EDX y mapeo elemental de rayos X con un voltaje de aceleración de 20 kV en alto vacío.

#### 2.2.5. FORS

La espectroscopía de reflectancia difusa de 400 a 1000 nm se realizó con un espectrómetro Ocean Optics QE65 equipado con una matriz CCD de silicio lineal. El punto seleccionado para el análisis se iluminó mediante un cable de fibra óptica acoplado a una lámpara halógena. La luz reflejada difusamente fue recogida por una fibra coaxial y disipada por el espectrómetro. Los espectros se registraron con un tiempo de integración de 10 ms y promediaron 4 adquisiciones.

#### 2.2.6. FTIR

Todas las muestras recogidas del *Tablero de mesa* (LS2447) se analizaron con FTIR como paso inicial en el flujo de trabajo de análisis. El análisis se realizó con un espectrómetro FTIR Hyperion 3000 equipado con un detector de telurio de mercurio y cadmio (MCT). La muestra se trituró en una celda de yunque de diamante (Spectra Tech, Thermo Fisher Scientific, Madison, WI, USA) y todos los materiales contenidos se analizaron a granel en modo de transmisión a través de un objetivo 15x. Se colectaron espectros en el rango de 4000-600  $\text{cm}^{-1}$  con una resolución de 4  $\text{cm}^{-1}$ . Cada espectro se obtuvo como la suma de 64 barridos. Los espectros se interpretaron mediante comparación con las bases de datos de las bibliotecas (MMA e IRUG Ediciones 2000 y 2007) y la literatura publicada, como se explica más adelante.

#### 2.2.7. Py-GC/MS

Los datos espectrales de masas GC/MS se recogieron en un GC/MSD de la serie 5977B de Agilent (Agilent Technologies, Santa Clara, CA, USA.) equipado con un adaptador sin ventilación. El espectrómetro de masas se configuró con un muestreador automático y un detector selectivo de masas de red 8890 de cuadrupolo único. Este sistema está equipado con un pirolizador multidisparo 3030D (Frontier Laboratories Ltd. Saikon, Japan) que se mantiene a 550°C y una temperatura de interfaz de 320°C utilizando un método de disparo único.

Se analizaron con py-GC/MS dos muestras del *Tablero de mesa* (LS2447) que reflejaban la resina incolora (muestra S5) y una capa transparente aplicada sobre una resina naranja (muestra S2). Se colocaron aproximadamente 20-30  $\mu\text{g}$  de cada muestra directamente en una Eco-copa limpia de acero inoxidable y se analizaron con y sin el uso de un agente derivatizante. El método de derivatización utilizado aquí se ha descrito ampliamente en otro lugar [22]. Brevemente, en experimentos de metilación asistida térmicamente, se añadieron 2-3  $\mu\text{L}$  de hidróxido de tetrametilamonio (TMAH, 25% en metanol) directamente a la muestra y se dejaron reposar durante 3-5 minutos antes del análisis.

La separación cromatográfica se llevó a cabo en una columna de polímero de fenil arileno no polar J&W-DB-5MS (Agilent Technologies, Santa Clara, CA, USA) (40 m de longitud efectiva de columna, 250  $\mu\text{m}$  de diámetro interior y 0,25  $\mu\text{m}$  de espesor de película). Las muestras se ejecutaron con una relación de división de 20:1. El programa de temperatura del horno GC fue el siguiente: temperatura inicial de 40°C mantenida durante un minuto. La temperatura se incrementó en 10°C/min hasta 320°C con un tiempo de mantenimiento de quince minutos. Se utilizó helio como gas portador. Se utilizaron Agilent Chemstation (version F.01.03.2357) y OpenChrom (version 1.5.0) [26] para el procesamiento de datos, incluida la identificación e integración de picos, y se aprovechó la colección de espectros de masas disponibles a través del National Institute for Standards and Technology (NIST) Chemistry WebBook [27], las bibliotecas espectrales del NIST 2005 y la literatura relacionada.



---

#### 2.2.8. LC/MS

Se extrajeron dos muestras (S2 y S3) del *Tablero de mesa* (LS2447) utilizando 6 µL de una solución de BF<sub>3</sub> en metanol al 4%, que se añadió directamente a un vial limpio que contenía la muestra. Tras la adición de la solución BF<sub>3</sub>, la muestra se sonicó durante 5 minutos y luego se dejó toda la noche a temperatura ambiente. Posteriormente, se añadieron 50 µL (dos alícuotas de 25 µL) de metanol y la solución se transfirió a un pequeño tubo de ensayo de vidrio. El extracto del tubo de vidrio se secó en un concentrador de vacío (Genevac EZ4P). Además, el vial con la muestra se enjuagó con 50 µL de metanol y se secó en el concentrador de vacío (Genevac EZ4P).

Los residuos se reconstituyeron con 20 µL de una mezcla de LC/MS o dimetilformamida de grado analítico, metanol/acetonitrilo (1/1, v/v) (1:4:5) (la mezcla MeOH/ACN también contiene 0,1% de ácido fórmico acuoso) y se transfirieron a un tubo de filtro centrífugo de PTFE antes de ser centrifugados a 12000 g durante 10 min. La solución filtrada y centrifugada se transfirió a un inserto de muestra desactivado asentado en un vial de muestreador automático limpio. Del volumen total, se inyectaron 7 µL de la solución de muestra extraída en el sistema LC/MS. Este proceso se repitió en los análisis en los que se emplearon modos de ionización negativa y positiva.

El análisis LC/MS se llevó a cabo en un espectrómetro de masas de tiempo de vuelo cuadrupolar Impact II (Bruker, Billerica, MA, USA) junto con un HPLC NexeraXR que consta de dos bombas de HPLC LC-20ADx con un mezclador de gradiente HPLC, un detector de matriz de diodos SPD30A, un horno de columna CTO-20AC, una unidad de desgasificación DGU-20A5R, un muestreador automático SIL-20ACx y un módulo de bus de comunicaciones CBS-20A (Shimadzu, Columbia MD). Se utilizó la interfaz de ionización por electrospray y la detección se llevó a cabo tanto en modo de ionización negativa como positiva. Para la operación de MS y LC se utilizaron Compass otofControl (ver. 6.3) y Compass Hystar (ver. 6.2), respectivamente, y el análisis de los datos se realizó con el software DataAnalysis (ver.6.1).

Se utilizó una columna de fase reversa Zorbax SB-C18 (partícula de 3,5 µm, 2,1 mm de diámetro interior x 150,0 mm, Agilent Technologies, Santa Clara, CA) con una columna de protección (Zorbax SB-C18, partícula de 3,5 µm, 2,0 mm de diámetro interior x 15,0 mm, Agilent Technologies, Santa Clara, CA) con un caudal de 0,2 ml/min. El prefiltro de la columna (filtro de precolumna Upchurch de volumen ultrabajo con fritas de acero inoxidable de 0,5 µm, Sigma-Aldrich, St. Louis MO) se colocó antes de la columna de protección. La temperatura de la columna se mantuvo a 40°C.

La fase móvil se eluyó en un gradiente de 0,1 % de ácido fórmico en agua de alta pureza (v/v) (A) y 0,1 % de ácido fórmico en una mezcla de metanol y acetonitrilo (1/1, v/v) (B). El sistema de gradiente fue del 90 % (A) durante 1 min → al 60 % (A) en 6 min en una pendiente lineal → al 1% (A) en 23 min en una pendiente lineal y se mantuvo al 1% (A) durante 3 min, y luego al 90% (A) en 1 min y se mantuvo al 90% (A) durante 18 min.

#### 2.2.9. RIS

La RIS se llevó a cabo con una cámara hiperespectral de visible a infrarrojo cercano (VNIR) (400 a 1000 nm) (SOC710-E Surface Optics Corporation) equipada con un sensor de imagen científico de semiconductor complementario de óxido metálico (sCMOS). Los cubos de imagen producidos son de 2048 × 2048 píxeles con 1024 canales espectrales.

Las superficies de los objetos se iluminaron con cuatro bombillas halógenas SoLux (EiKO BB18003, 50 W, 4700 K) alojadas en cabezales de carril de yugo giratorio (iluminación WAC, HHT-809) y montadas en dos carriles de iluminación. Los dos soportes de luz se colocaron a 45 grados con respecto a la normal de la superficie decorada. Se recolectaron cubos de imágenes de las escenas decorativas y de un panel de reflectancia blanca difusa Spectralon® (99% reflectante, LabSphere, Inc., North Sutton, NH, USA) bajo la misma configuración de iluminación y recolección de datos; para convertir los datos de los objetos a reflectancia aparente, el cubo de imagen del panel blanco se dividió del cubo

---

de imagen del objeto. El ruido oscuro (el ruido eléctrico inherente al detector y la señal del sensor de referencia) se midió y restó automáticamente para cada adquisición.

El procesamiento posterior de las imágenes se llevó a cabo en ENVI Classic versión 5.6.3 (Exelis Visual Information Solutions, Boulder, Colorado). El procesamiento de datos utilizado aquí se ha descrito ampliamente en otro lugar [28]. La reflectancia aparente normalizada se calculó a partir de los datos brutos, descritos brevemente anteriormente y detallados en [29]. La herramienta Spectral Hourglass Wizard incorporada en ENVI se utilizó para identificar firmas espectrales únicas, miembros finales y para visualizar la distribución de estos miembros finales en la escena de la imagen utilizando un método de clasificación de mapeador de ángulos espectrales (SAM). Los mapas de los miembros finales se visualizaron en FIJI (ImageJ versión 1.53q) y los espectros relacionados se analizaron en Igor Pro 8 (WaveMetrics, Portland, OR) [30]. Los puntos de inflexión se determinaron ajustando una función gaussiana a los picos en los espectros calculados de la primera derivada y extrayendo el máximo de pico del ajuste gaussiano, mientras que las absorciones se identificaron mediante cambios de valor negativos a positivos en el espectro de la primera derivada (es decir, cruces por cero en las gráficas).

### 3. Resultados y discusión

En esta investigación, se adoptó un enfoque multianalítico para identificar la naturaleza de la resina y los colorantes orgánicos e inorgánicos utilizados para conferir coloraciones específicas a las resinas. En la discusión a continuación, el término resina coloreada se usa para indicar la mezcla intencional de la resina *mopa mopa* con pigmentos y colorantes. En cambio, el término resina incolora se refiere al uso de la resina sin la adición de estos colorantes.

#### 3.1. Análisis de medios aglutinantes y recubrimientos superficiales orgánicos

##### 3.1.1. Resina

Para la identificación de la resina, se realizaron análisis por FTIR, Py-GC/MS y LC/MS en la resina incolora (S5) recogida de la superficie del *Tablero de mesa* del siglo XVII (LS2447), así como en muestras de referencia de *E. pastoensis* cruda y hervida, ya descritas en [22]. El análisis FTIR de la muestra S5 presenta características espectrales correspondientes a los modos de estiramiento simétrico de metileno ( $2854\text{ cm}^{-1}$ ) y asimétrico ( $2927\text{ cm}^{-1}$ ) y una amplia envolvente de OH (Figura 9A, traza roja). Otros rasgos asociados a compuestos alifáticos están presentes en  $1458$ ,  $1414$ ,  $1375$  y  $725\text{ cm}^{-1}$ , con el pico a  $1414\text{ cm}^{-1}$  relacionado con grupos metileno adyacentes a ésteres o ácidos carboxílicos. Las fracciones que contienen oxígeno también están indicadas por un fuerte rasgo espectral a  $1716\text{ cm}^{-1}$  (estiramiento del carbonilo) con un hombro a aproximadamente  $1730\text{ cm}^{-1}$  acompañado de bandas a  $1246$ ,  $1176$  y  $1100\text{ cm}^{-1}$ . Se identificaron características espectrales similares en la muestra de referencia cruda de *mopa mopa* (Figura 9A, traza negra), así como en los análisis reportados de la resina de *mopa mopa* [7,17,19]. Análisis previo de FTIR de lacas colombianas [7,22] y peruanas [17,31] también ha identificado *mopa mopa* en una serie de objetos que datan de la época colonial. No se recogieron muestras de resina de LS2000 ni de LS2361, por lo que no es posible conocer la composición de la resina en estos objetos.

Un análisis adicional de la resina (S5) recogida del *Tablero de mesa* (LS2447) y una muestra de referencia de *mopa mopa* "cruda" con py-GC/MS (Figura 9B) fue en gran medida consistente con los resultados publicados sobre la resina de *mopa mopa* [7,22,31].

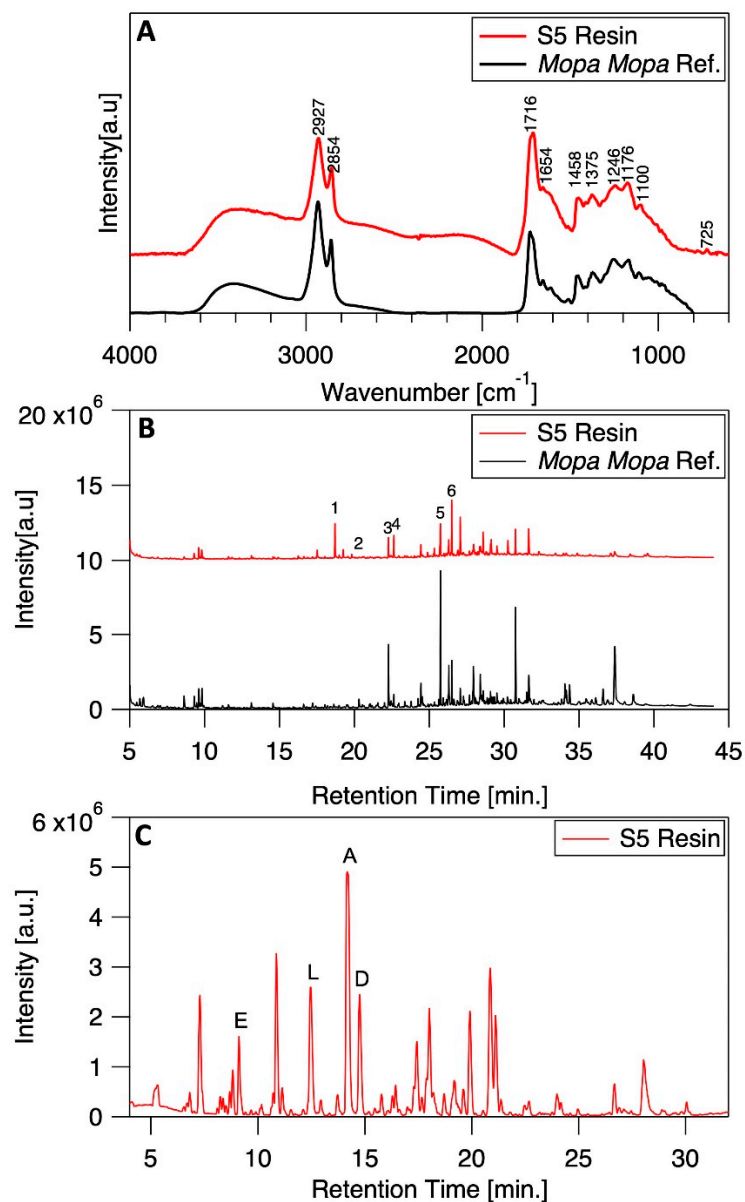

**Figura 9.** (A) Espectros FTIR corregidos desde la línea de base y cromatogramas (B) Py-GC/MS de la muestra S5 de la mesa (LS2447, rojo) y la resina de *mopa mopa* sin procesar (negro) que indican la presencia de (1) dimetilazalato, (2) metil p-metoxycinamato, (3) metil-3,4-dimetoxycinamato, (4) palmitato de metilo y (5 y 6) compuestos con patrones de fragmentación similares a los picos 7 y 9 informados por Newman y coautores [6]. (C) Análisis de LC/MS, en modo de ionización negativa, del aglutinante de resina que contiene ácido elágico (E), luteolina (L), apigenina (A) y diosmetina (D).

Específicamente, el cromatograma está dominado por la presencia de un compuesto no identificado previamente reportado por Newman y coautores [7] con fragmentos de masa a 215, 173, 141, 81 y 87 m/z (por intensidad en orden descendente) (Figura 9B, traza roja).

Asimismo, el p-metoxycinamato de metilo (20,31 min) y el 3,4-dimetoxycinamato de metilo (22,27 min), junto con una serie homóloga de ácidos dicarboxílicos y ésteres metílicos de ácidos grasos de los ácidos azelaico (18,7 min), palmítico (22,64 min) y esteárico (24,44 min), una serie de derivados de glicerol (9,3-9,7 min) y éter dimetílico y trimetílico de apigenina son característicos de las resinas de *mopa mopa* [7,22]. Los compuestos de elución posteriores identificados aquí, que consisten principalmente en triterpenoides pentacíclicos (30-40 min), también se informan en [22]. Las diferencias en



las proporciones de los picos entre los compuestos eluidos podrían reflejar la manipulación (calentamiento y envejecimiento) de la resina coloreada frente a la resina cruda. El análisis LC/MS de la resina incolora (Figura 9C) indica la presencia de varios compuestos previamente identificados, incluyendo ácido elágico, luteolina, apigenina y diosmetina, un derivado de la luteolina (Tabla 2) [7]. Según las proporciones respectivas de estos compuestos, la resina incolora se parece más a *E. pastoensis* que a *E. utilis*. Aunque el aglutinante de resina tiene un aspecto rojizo en sí mismo, no se identificó ningún colorante rojo mediante LC/MS. Mientras que py-GC/MS permite la identificación de algunos compuestos no volátiles y puede ser útil para algunos análisis de colorantes, LC/MS no requiere que un compuesto sea volátil, solo soluble en una fase móvil adecuada, lo que lo hace más apropiado para el análisis de colorantes. Fundamentalmente, los dos enfoques se basan en principios similares, la ionización de un compuesto en una fase móvil gaseosa o líquida y luego la separación cromatográfica de las especies cargadas, y las dos técnicas proporcionan información complementaria y suplementaria. Además, la espectrometría de masas en tándem de cromatografía líquida, tal como se emplea aquí, tiene una mayor sensibilidad y selectividad que la LC/MS tradicional. El análisis LC/MS de la muestra de resina hervida indica una presencia similar de luteolina, apigenina y diosmetina, todos los cuales se han reportado en el análisis de resinas de *mopa mopa* [6,22]. La Py-GC/MS de la misma muestra de resina hervida analizada aquí ha sido reportada previamente por Pozzi y sus coautores [22]. Para un resumen tabulado de los compuestos identificados por py-GC/MS de la resina incolora, véase la Tabla S2 de Material Suplementario S1.

**Tabla 2.** Resumen de los compuestos identificados por análisis de LC/MS.

| Objeto y muestra            | Tiempo de retención [min] | Señales UV [nm]    | Compuesto detectado                                                                        | Material sugerido                                       |
|-----------------------------|---------------------------|--------------------|--------------------------------------------------------------------------------------------|---------------------------------------------------------|
| LS2447 S2<br><i>Naranja</i> | 7.2                       | 215, 243, 323      | 1-O-Caffeoylglycerol<br>C <sub>12</sub> H <sub>14</sub> O <sub>6</sub>                     | Colorante amarillo desconocido                          |
|                             | 12.2                      | 219, 208, 253, 368 | Quercetina<br>C <sub>15</sub> H <sub>14</sub> O <sub>6</sub>                               |                                                         |
|                             | 14.3                      | 264, 357           | Kaempferol<br>C <sub>15</sub> H <sub>10</sub> O <sub>6</sub>                               |                                                         |
|                             | 14.9                      | 201, 255, 348      | Isorhamnetin (derivado de la quercetina)<br>C <sub>16</sub> H <sub>11</sub> O <sub>7</sub> |                                                         |
|                             | 22.7                      | N/A                | Desconocido<br>C <sub>15</sub> H <sub>10</sub> O <sub>8</sub>                              |                                                         |
|                             | 17.5                      | 195, 229, 283, 462 |                                                                                            | Colorante rojo desconocido                              |
|                             | 19                        | 196, 238, 283, 607 | Posible contaminación por índigo (visible bajo el microscopio)                             | Índigo <sup>†</sup>                                     |
|                             | 9.1                       | 252, 366           | Ácido elágico<br>C <sub>14</sub> H <sub>6</sub> O <sub>8</sub>                             | <i>Mopa mopa</i> (tentativamente <i>E. pastoensis</i> ) |
|                             | 12.3                      | 208, 347           | Luteolina<br>C <sub>15</sub> H <sub>10</sub> O <sub>6</sub>                                |                                                         |
|                             | 14.2                      | 199, 266, 336      | Apigenina<br>C <sub>15</sub> H <sub>10</sub> O <sub>5</sub>                                |                                                         |

|                        |      |                    |                                                                |                                        |
|------------------------|------|--------------------|----------------------------------------------------------------|----------------------------------------|
|                        | 14.8 | 204, 250, 344      | Diosmetina (derivado de la luteolina)<br>$C_{16}H_{11}O_6$     |                                        |
| <b>LS2447 S3</b>       | 7.2  | 215, 243, 323      | 1-O-Caffeoylglycerol<br>$C_{12}H_{14}O_6$                      |                                        |
| <i>Verde</i>           | 12.2 | 219, 208, 253, 368 | Quercetina<br>$C_{15}H_{14}O_6$                                |                                        |
|                        | 14.3 | 264, 357           | Kaempferol<br>$C_{15}H_{10}O_6$                                | Colorante amarillo desconocido         |
|                        | 14.9 | 201, 255, 348      | Isorhamnetina (derivado de la quercetina)<br>$C_{16}H_{11}O_7$ |                                        |
|                        | 22.7 | N/A                | Desconocido<br>$C_{15}H_{10}O_8$                               |                                        |
|                        | 19   | 196, 240, 283, 617 | Posibles rastros de índigo (baja tasa de extracción)           | Indigo <sup>†</sup>                    |
|                        | 9.1  | 252, 366           | Ácido elágico<br>$C_{14}H_6O_8$                                |                                        |
|                        | 12.3 | 208, 347           | Luteolina<br>$C_{15}H_{10}O_6$                                 | <i>Mopa mopa</i>                       |
|                        | 14.2 | 199, 266, 336      | Apigenina<br>$C_{15}H_{10}O_5$                                 | (tentativamente <i>E. pastoensis</i> ) |
|                        | 14.8 | 204, 250, 344      | Diosmetin (derivado de la luteolina)<br>$C_{16}H_{11}O_6$      |                                        |
| <b>LS2447 S5</b>       | 9.1  | 252, 366           | Ácido elágico<br>$C_{14}H_6O_8$                                |                                        |
| <i>Resina incolora</i> | 12.3 | 208, 347           | Luteolina<br>$C_{15}H_{10}O_6$                                 | <i>Mopa mopa</i>                       |
|                        | 14.2 | 199, 266, 336      | Apigenina<br>$C_{15}H_{10}O_5$                                 | (tentativamente <i>E. pastoensis</i> ) |
|                        | 14.8 | 204, 250, 344      | Diosmetina (derivado de la luteolina)<br>$C_{16}H_{11}O_6$     |                                        |

<sup>†</sup>El término índigo se refiere a compuestos que contienen indigotina y no a una fuente específica de índigo.

### 3.1.2. Recubrimiento superficial

Se identificaron firmas espectrales indicativas de una cera en un recubrimiento superficial transparente en la muestra S2, recogida en el *Tablero de mesa* (LS2447). Específicamente, el espectro FTIR muestra un pico agudo a 1736 cm<sup>-1</sup> relacionado con el estiramiento C=O de los grupos éster (Figura 10A) y la división de los picos a 1470 y 720 cm<sup>-1</sup> que son rasgos característicos de una serie de ceras vegetales y animales. No había características espectrales discernibles relacionadas con la resina de *mopa mopa* identificables en este material. En algunos casos, el sulfato de calcio también se identificó en función de la aparición de características espectrales a 1620, 1100 y 660 cm<sup>-1</sup>. El análisis de un qero pintado, que se cree que es anterior al período colonial, sugirió que las ceras podrían haber sido utilizadas como aglutinantes de pigmentos además de la resina de *mopa mopa* [31], aunque los análisis posteriores solo informan del uso de resinas de *mopa*

*mopa* [6,7,17,19,22]. También se ha informado de que la cera se ha utilizado en la reparación de objetos *barniz de Pasto* [22]. En el presente estudio, sin embargo, no está claro si estos materiales son originales o si están relacionados con un mantenimiento rutinario posterior o una intervención de conservación. La cera no parece usarse como aglutinante aquí, ya que no parece estar directamente relacionada con los materiales coloreados y, en cambio, está presente en una capa encima de la capa de resina coloreada. Para comprender si este material ceroso era nativo del objeto o resultado de una intervención desconocida, también se empleó py-GC/MS. Las características más abundantes en el cromatograma del recubrimiento transparente fueron el éster metílico de N,N-dimetilglicina seguido de un compuesto desconocido que se eluye a los 5,5 min (Figura 10B). Este compuesto desconocido tiene un pico de base en  $m/z$  72 y una masa aparente de 131 uma, que es similar al patrón de fragmentación reportado para el éster metílico N-N-dimetilalanina [32]. Como aquí no se identificaron ni el pirrol ni el indol, es probable que estos compuestos estén relacionados con el propio TMAH. Este material de recubrimiento transparente también se asocia con una serie de *n*-alcanos  $C_{24}$ - $C_{34}$ , sin preferencia par-impar y siendo  $C_{26}$  el más abundante de los *n*-alcanos. Además de los *n*-alcanos, se identificaron ésteres metílicos de ácidos grasos de orden uniforme entre  $C_{12}$  y  $C_{18}$ , siendo el ácido palmítico ( $C_{16}$ ) el más abundante. También se pudo identificar el éster metílico del ácido tetracosanoico ( $C_{24}$ ). La ausencia de diácidos sugiere que no hay aceite presente en la matriz. En la actualidad, la identificación de este material no está clara.

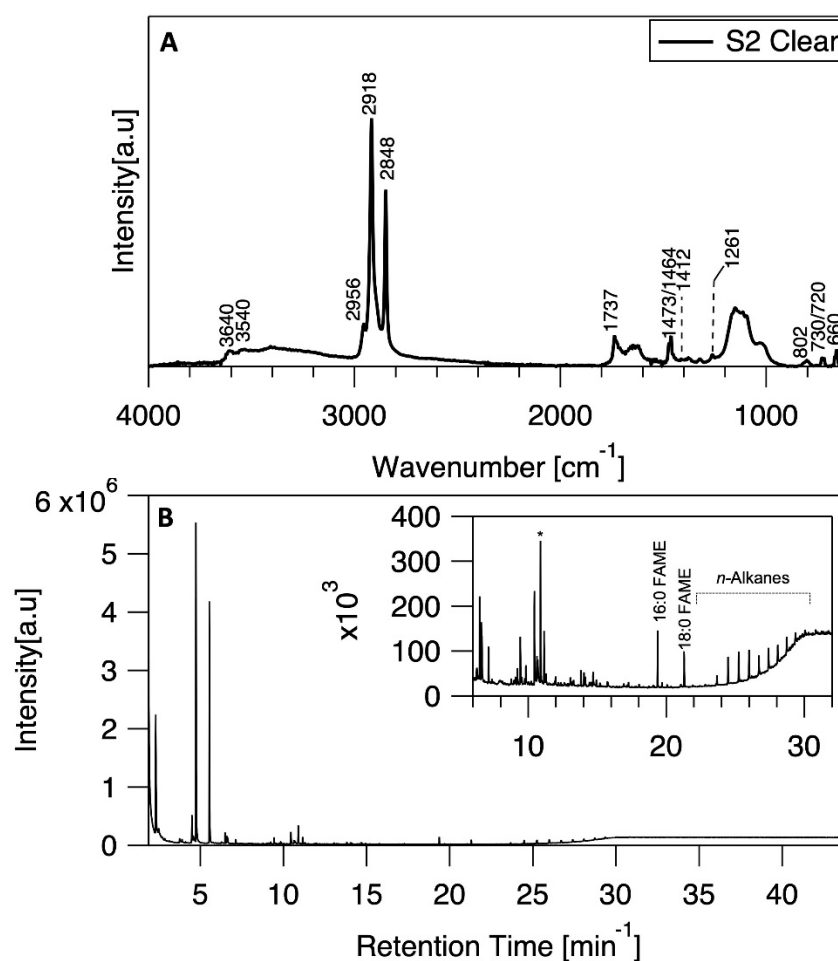

**Figura 10.** (A) Espectro FTIR corregido de línea de base y cromatograma B. Py-GC/MS del recubrimiento transparente aislado de la muestra de resina de color naranja (S2) recolectada de la mesa (LS2447). (Recuadro) Ampliación del cromatograma que abarca tiempos de retención entre 6 y 32 min.



### 3.2. Análisis de pigmentos y colorantes

#### 3.2.1. Blanco y crema

El objeto más antiguo (*Arqueta*, LS2361), decorado con *barniz mate*, se caracteriza por una paleta de colores limitada dominada por áreas de color crema, que mostraban la presencia ubicua de mercurio (Hg), acompañada de picos menos intensos de cloro (Cl) (Figura 11A), así como en áreas rosas, lilas, grises, verdes y azul-verdes. La presencia simultánea de estos dos elementos indica el uso del calomel, cuyo uso en obras de arte, incluso en otros objetos *barniz de Pasto* del siglo XVII, ha sido ampliamente documentado en los últimos años [17-20,22,33]. El calomel se usa ampliamente para trazar líneas finas y diseños de color crema y se mezcla con resinas tintas como componente matificador y aclarante. En el segundo *Cofre* (LS2067) perteneciente al primer grupo, decorado con *barniz brillante*, el uso de calomel se limita a áreas de color crema mate (en su mayoría contornos finos), como sugiere la detección de Hg y trazas de Cl (Figura 11B). Como se encuentra comúnmente en los objetos *barniz brillante*, la detección de plata en todo el objeto se alinea con la presencia de una hoja de plata debajo de las láminas de resina.

Aunque agrupados para este estudio, los contemporáneos *Escritorio* y *Tablero de mesa* (LS2446 y LS2447, respectivamente), ambos realizados con *barniz mate*, tenían algunas diferencias compositivas clave. Ninguna de las áreas de color crema del *Escritorio* mostró la presencia de elementos cromóforos, lo que sugiere el uso exclusivo de colorantes orgánicos en combinación con la resina (Figura 11C, espectro azul). Sorprendentemente, las mediciones pXRF detectaron plomo (Pb) en todas las áreas blancas del *Tablero de mesa* (Figura 11C, espectro naranja). Este hallazgo infiere el uso de blanco de plomo en lugar de calomel en este objeto para obtener el color blanco. El segundo y más moderno *Escritorio* (LS2000), realizado con *barniz brillante*, muestra un uso extensivo de Pb (Figura 11D, espectro azul claro), probablemente en forma de blanco de plomo, en la mayoría de los colores, con áreas esporádicas donde se detectó Hg, supuestamente relacionado con el uso de calomel (Figura 11D, espectro negro). Hasta la fecha, este objeto de *barniz de Pasto* y la calabaza de la colección del HSML [22] han sido la única evidencia del uso simultáneo de blanco de plomo y calomel. En sus relatos, Alexander von Humboldt, quien describió los colorantes empleados en la fabricación del *barniz de Pasto* en 1801 [34], había identificado el blanco de plomo como la fuente del blanco. La identificación del calomel [20] plantea la posibilidad de que este pigmento inusual sea un marcador indígena anterior a la introducción del blanco de plomo.

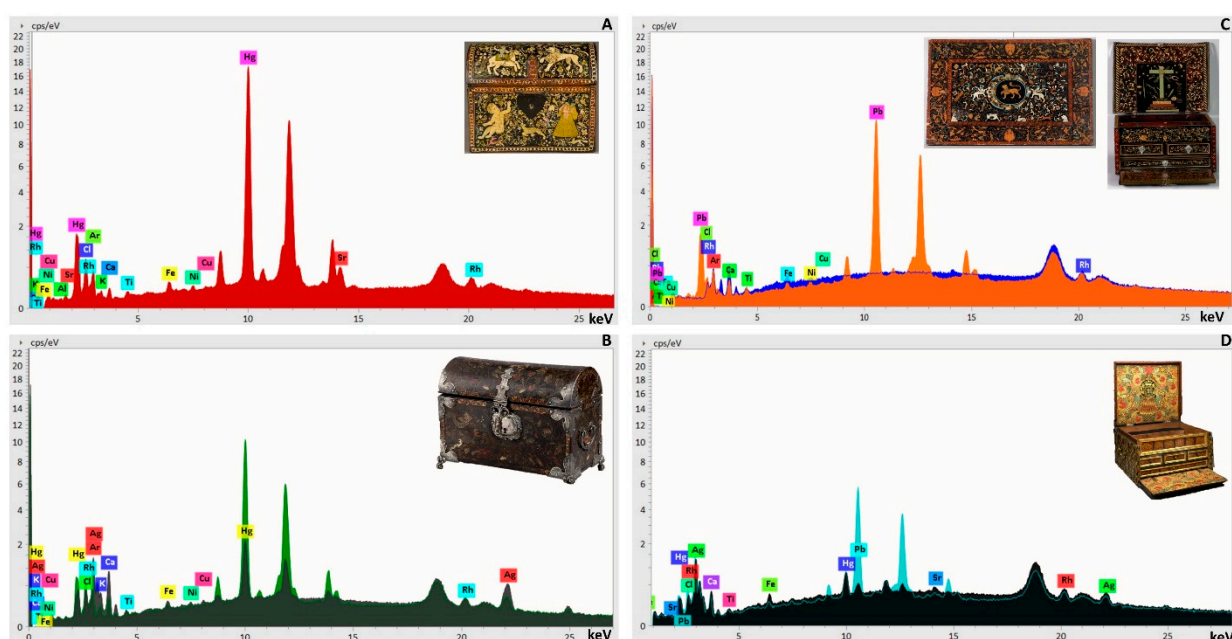

**Figura 11.** Espectros XRF representativos adquiridos de áreas de color crema y blanco en: (A) la *Arqueta* (LS2361) (espectro rojo recogido de un área de color crema); (B) el *Cofre* (LS2067) (los espectros verde y verde oscuro muestran diferentes contenidos de mercurio medidos en diferentes áreas); (C) el *Tablero de mesa* (LS2447) (espectro naranja) y el *Escritorio* (LS2446) (espectro azul); (D) el *Escritorio* (LS2000) (los espectros azul claro y negro muestran la presencia de blanco de plomo y posiblemente calomel en diferentes áreas, respectivamente).

### 3.2.2. Azul y negro

Como se anticipó, el índigo apareció en todas las resinas de color azul y negro. Los tintes ricos en indigotina pueden obtenerse de plantas como el glasto (*Isatis tinctoria*), que se encontraba principalmente en Europa y partes de Norteamérica, o *Indigofera tinctoria* e *Indigofera suffruticosa*, que se encuentran ampliamente en Centroamérica y Sudamérica. En el texto que sigue, el término índigo se utiliza para referirse a todos los compuestos a base de indigotina, sin identificación específica de la fuente. Dada la gran escala del *Tablero de mesa* (LS2447), la espectroscopía de reflectancia de este objeto se limitó a mediciones puntuales (Figura 12).

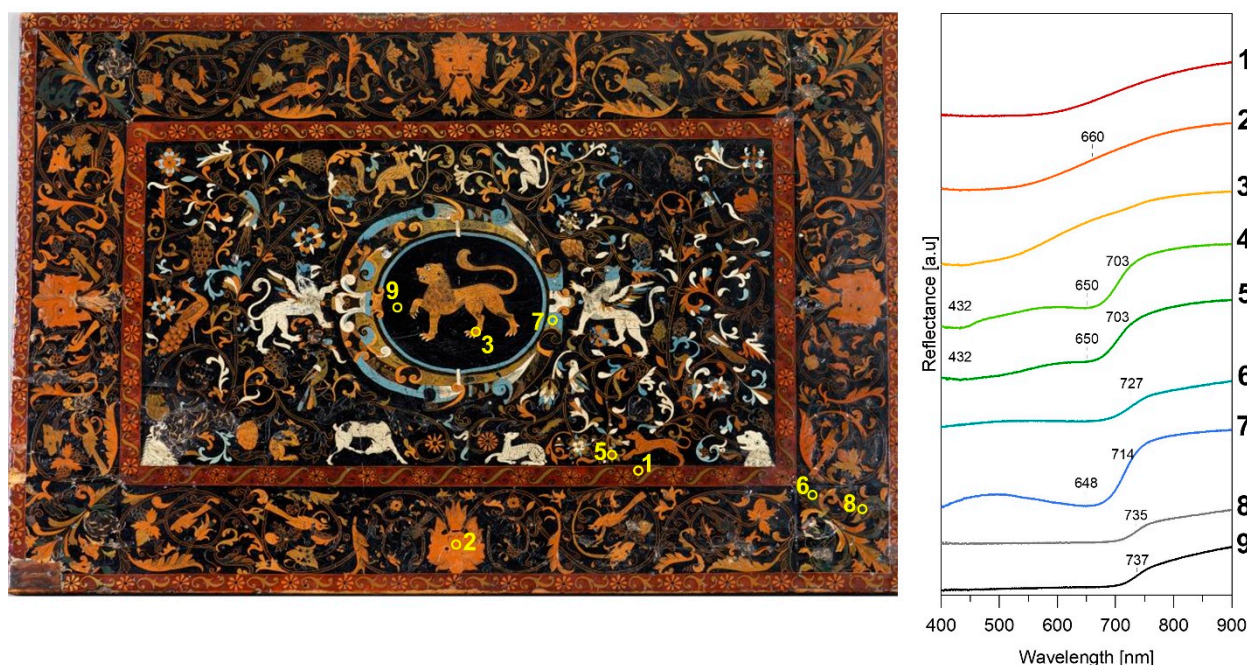

**Figura 12.** Izquierda. Áreas aproximadas de adquisición de FORS en el *Tablero de mesa* (LS2447) indicadas por círculos amarillos abiertos y enumerados. Derecha. Espectros de reflectancia FORS se muestran con los números de punto correspondientes a la derecha del gráfico.

El análisis FORS de una ilustración de color azul claro, similar a un arabesco, exhibe un máximo de absorbancia a 648 nm acompañado de un punto de inflexión a 714 nm que concuerda con la presencia de índigo (Figura 12, punto 7). El índigo también está presente en el medallón casi negro que rodea al león central (Figura 12, punto 9), que está asociado a un punto de inflexión significativamente desplazado al rojo a 737 nm, aunque el característico máximo de absorbancia aparente ya no es evidente. Las propiedades de reflectancia del índigo incluyen un máximo de absorbancia a aproximadamente 660 nm, un punto de inflexión entre 690-730 nm [35] y está significativamente modulado por el aglutinante, el entorno químico, la adición de otros colorantes y la concentración de índigo [36-37]. Como sugieren los relatos de Humboldt, el índigo se usaba tanto en resinas de color azul como negro, y la intensidad del color estaba modulada por la dilución del pigmento. El índigo se identificó previamente en resinas a base de *mopa mopa* negras y azules utilizadas para decorar una calabaza del siglo XVII [22], un cofre de madera del siglo XVII [19] y tazas qero pintadas peruanas que datan del período Inka colonial [31,38].

FORS, FTIR y análisis de imágenes de cuatro textiles peruanos datados en períodos anteriores revelan el uso de índigo en pigmentos azules y negros [39].

El análisis FTIR de la muestra S6 (Figura 13A), una resina visualmente negra recogida del *Tablero de mesa* (LS2447), muestra solo pequeñas diferencias en las firmas espectrales en comparación con la resina incolora. En la región de estiramiento del carbonilo, el pico a  $1726\text{ cm}^{-1}$  es más pronunciado (Figura 13B), lo que puede indicar la presencia de un aceite. De hecho, también se han identificado aceites en resinas de *mopa mopa* coloreadas y no coloreadas [7]. Otros autores han sugerido que pueden haberse utilizado lechadas de aceite para facilitar la incorporación de colorantes en la resina [40]. Rasgos débiles adicionales a 1627, 1614 y un hombro a aproximadamente  $1480\text{ cm}^{-1}$  pueden estar relacionadas con el uso de índigo, que se ha identificado previamente en resinas de color azul y negro en lacas colombianas [7,22]. El análisis Raman de la misma muestra confirma la identificación de un colorante a base de indigotina basado en la presencia de un desplazamiento Raman característico a  $1576\text{ cm}^{-1}$  (Figura 13C) [22,36,41].

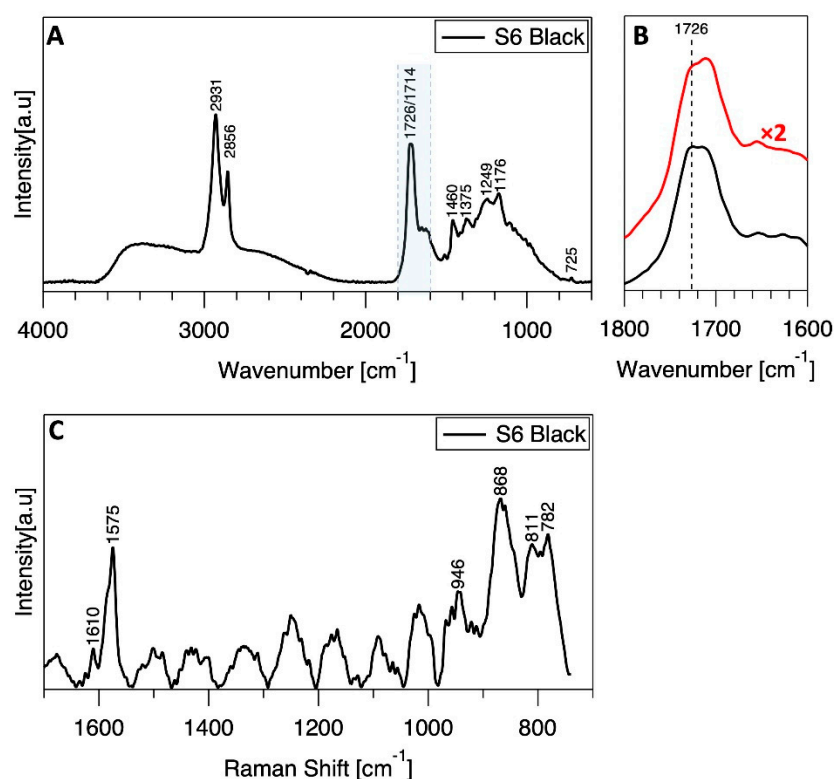

**Figura 13.** (A) Espectro FTIR corregido de línea de base de la muestra S6, eliminado de un área negra en la mesa, LS2447, con la región de estiramiento del carbonilo resaltada, y (B) ampliada de la misma región con la resina negra mostrada en negro y la resina incolora mostrada en rojo (desplazada y escalada por un factor de 2). La línea discontinua a  $1726\text{ cm}^{-1}$  puede ser indicativa de un aceite añadido. (C) Espectro Raman corregido de línea de base de la muestra S6 que contiene índigo (pico principal a  $1576\text{ cm}^{-1}$ ) como colorante principal.

Las características espectrales adicionales que aparecen a  $868/860\text{ cm}^{-1}$ ,  $811$  y  $783\text{ nm}$  están posiblemente relacionadas con la presencia de compuestos de oxalato no identificados. No se puede descartar que se añadiera un colorante negro adicional (es decir, negro a base de hueso o de carbono) para lograr las resinas casi negras utilizadas en el fondo del *Tablero de mesa* (LS2447). El análisis XRF de esta área no indica la presencia de fósforo, ni el análisis FTIR de esta muestra exhibe un pico característico a  $2012\text{ cm}^{-1}$ , que podría indicar la presencia de hueso o negro marfil. Además, los rasgos amplios centrados alrededor de  $1325$  y  $1580\text{ cm}^{-1}$  están ausentes del espectro Raman, lo que indica que tampoco se detecta negro a base de carbono. En el análisis de 150 qeros peruanos, se identificó negro de humo en casi todos los objetos [30]. Tentativamente, el color



visualmente negro de esta resina es atribuible únicamente al índigo, lo cual es consistente con la literatura histórica y científica que indica el uso de índigo calcinado o concentrado para obtener tonos negros en objetos de *barniz de Pasto* [5,19,22,33].

Aunque la alta curvatura de la tapa de la *Arqueta* (LS2361) impidió el análisis RIS, se pudo inspeccionar la cara relativamente plana y los lados cortos de la *Arqueta*. Cada lado de la *Arqueta* tiene un fondo visualmente negro que se asocia con una absorbancia uniforme entre 400 y 700 nm, un aumento en la reflectancia a aproximadamente 700 nm y un punto de inflexión a aproximadamente 750 nm que se identifica tentativamente como índigo (Figura 14).

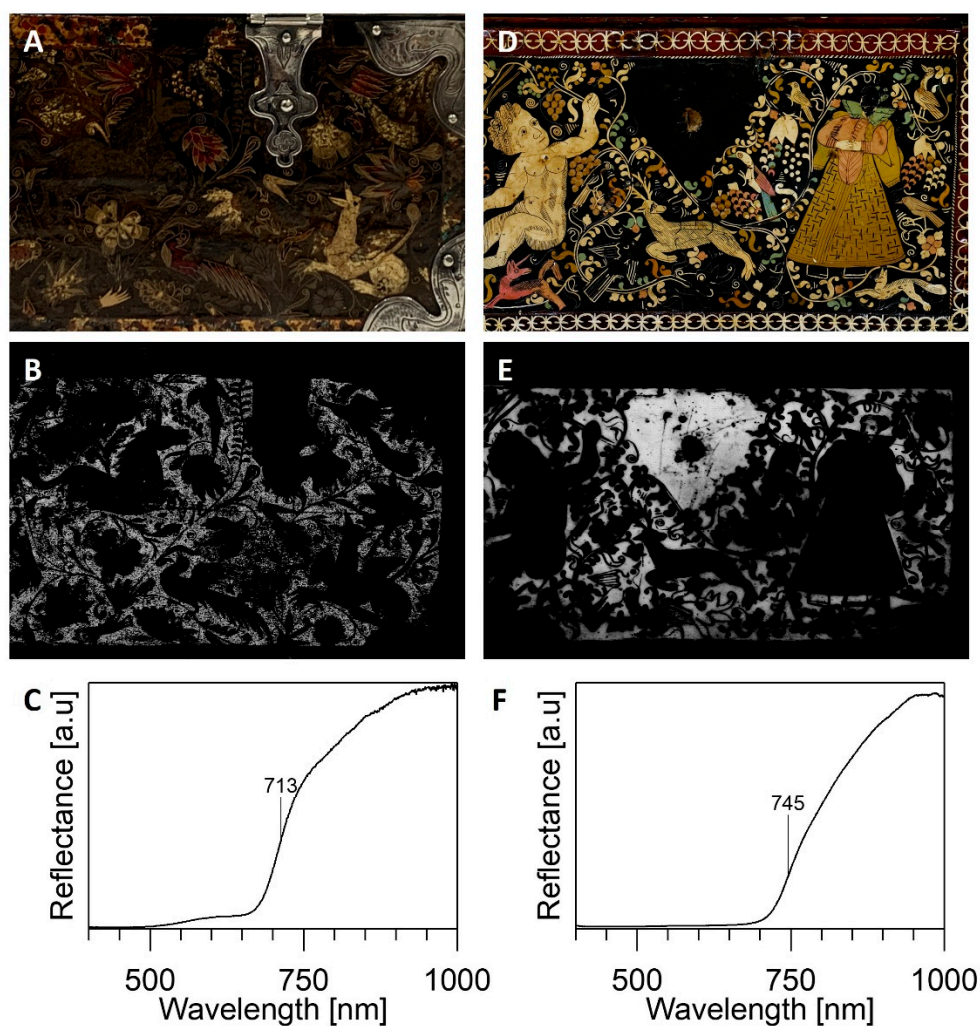

**Figure 14.** Área de (A) *Cofre* (LS2067) y (D) la cara frontal de la *Arqueta* (LS2361) analizada por RIS e imágenes de reglas de miembros finales (mapas de distribución) para (B) LS2067 y (E) LS2361 que muestran la distribución de un compuesto casi negro que contiene índigo. Espectros de reflectancia correspondientes a los miembros finales para (C) LS2067 y (F) LS2361 con las propiedades de reflectancia pertinentes indicadas.

Como han comentado otros autores, en zonas de índigo concentrado, el máximo de absorbancia que se observa típicamente a unos 660 nm está ausente [42]. Conclusiones similares son reportadas por Alvarez-White y sus coautores [5], quienes señalan que los fondos oscuros en una selección de objetos de *barniz de Pasto* están posiblemente asociados con índigo densamente saturado o calcinado. El análisis XRF del fondo negro que rodea la cerradura en la parte frontal de la *Arqueta* detectó solo señales muy débiles de Cl y Hg, lo que sugiere que no hay colorantes inorgánicos presentes en esta área. Sin embargo, su



presencia, aunque en trazas, podría deberse a la contaminación o a una capa más profunda que posiblemente contenga calomel.

La decoración de color gris azulado pálido, que incluye una de las aves centrales en LS2000, la cola azul más claro del pájaro en la parte delantera de la *Arqueta* (LS2361) y la liebre central en un lado de la misma caja son consistentes con la presencia de índigo, que presenta un máximo de absorbancia en torno a 640-650 nm y un punto de inflexión en unos 700 nm (Figura 15).

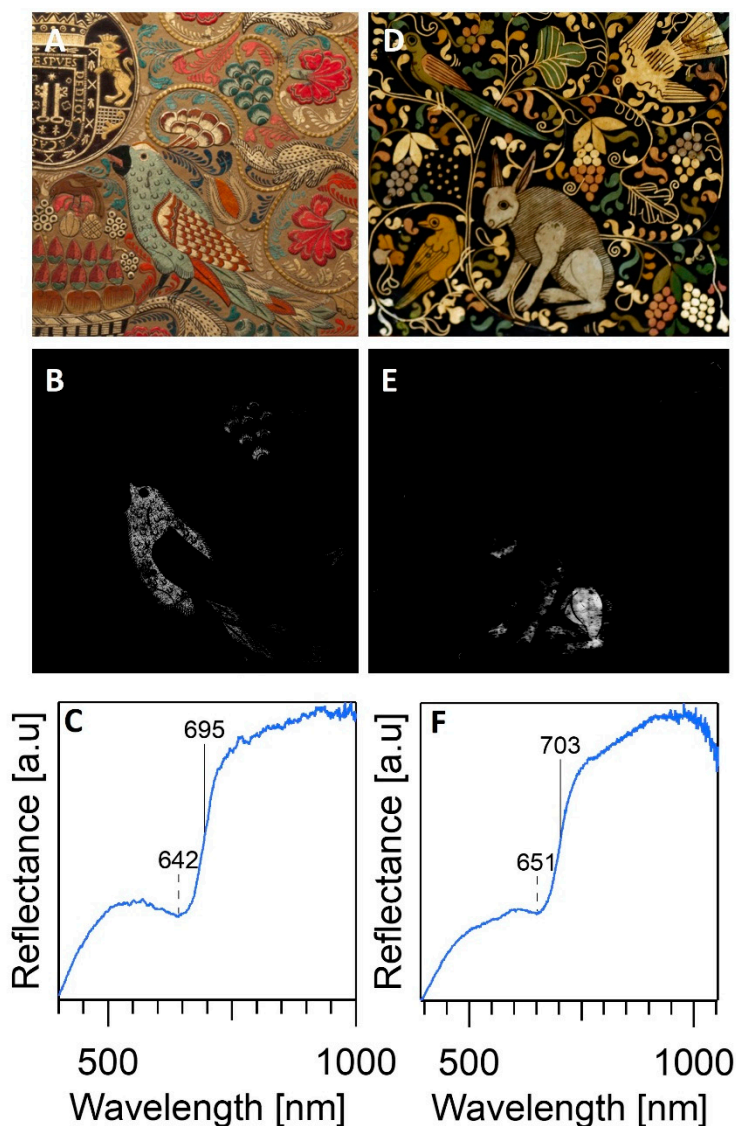

**Figure 15.** Área analizada por RIS para (A) *Escritorio* (LS2000) y (B) Mapa de distribución de miembros finales de RIS de la misma área que ilustra la distribución de una resina de color azul grisáceo pálido y (C) el espectro de miembros finales de correspondiente. En un segundo ejemplo, el área analizada por la RIS para el panel lateral (D) de la *Arqueta* (LS2361) con una ilustración de una liebre azul grisácea pálida, el mapa de distribución del miembro final de la RIS relacionado con (E) y (F) el espectro del miembro final de la RIS.

El análisis XRF de la cola azul claro del ave en la parte frontal del *Cofre* indica la presencia de mercurio, presumiblemente en forma de calomel, aunque no se identifican otros elementos relacionados con el colorante, mientras que los azules claros en el *Escritorio* (LS2000) muestran una fuerte señal de Pb, consistente con la presencia de blanco de plomo posiblemente utilizado en combinación con índigo. Las mezclas de calomel e índigo se observaron previamente en el análisis de un mueble de mesa comparable del siglo XVII en la colección del V&A [17]. Los tonos azules verdosos se encuentran en todos

---

los objetos, especialmente en la ilustración de los detalles florales y en forma de enredadera. Los espectros de los miembros finales de los análisis RIS correspondientes a estas áreas presentan puntos de inflexión a 700-710 nm y máximos de absorbancia a aprox. 645-650 nm. En conjunto, estas características espectrales sugieren el uso de una matriz a base de índigo. El análisis FORS de pigmentos verdes a base de índigo que incorporan colorantes amarillos a menudo conserva el máximo de absorbancia característico del índigo junto con un desplazamiento al rojo en el punto de inflexión a aproximadamente 715 nm [43].

Para evitar la redundancia, para los objetos restantes solo se informan y discuten los resultados de RIS. Un resumen completo de los análisis de espectroscopía de reflectancia para todos los objetos se proporciona en los Material Suplementario S1 adjuntos en las Tablas S2-7 y Figuras S1-11.

### 3.2.3. Rojo, rosa y morado

En la época prehispánica, los colorantes rojos más utilizados incluían colorantes de insectos, como la cochinilla (*Dactylopius coccus*), y colorantes vegetales derivados del *Galium* y del *Relbunium*, todos los cuales son tintes de antraquinona [42,44-46]. Los relatos de Humboldt, sin embargo, sugieren que el colorante utilizado en la producción de resinas de color rojo en los objetos *barniz de Pasto* era el achiote (*Bixa orellana*) [34], un colorante carotenoide derivado de la capa externa de la semilla dentro del fruto del arbusto [46].

A excepción del *Escritorio* (LS2446), que no lleva resinas de color rojo, y el *Tablero de mesa* (LS2447), aparecen áreas de resinas de color rojo y rosa en diferentes tonos en todos los objetos y el principal tinte rojo identificado es a base de insectos. Por ejemplo, los colorantes rojos a base de insectos también se utilizan en el *Escritorio* (LS2000) para producir diferentes tonos de rojo, rosa y marrón (Figura 16). Característicamente, estas resinas se asocian con características de absorción a aprox. 520 y 560 nm con puntos de inflexión de aprox. 590-595 nm. Los pigmentos derivados de las antraquinonas, como la cochinilla o la rubia, exhiben característicamente bandas estructuradas de doble absorción entre 500 y 580 nm; los pigmentos de laca roja a base de insectos generalmente se pueden distinguir de las fuentes vegetales en función de los cambios de posición de estas absorciones estructuradas, con máximos de absorbancia rojos de insectos que generalmente aparecen a aprox. 520-535 y 560-565 nm y colorantes de antraquinona derivados de plantas que presentan bandas de absorbancia a aprox. 500-515 y 535-545 nm [43,47,48]. Una resina de color melocotón, utilizada en la ilustración del babero de la figura central en la cara larga del *Cofre* pequeño y en algunas de las ilustraciones de frutas y animales en los lados, presenta dos bandas de absorbancia a 520 y 560 nm, probablemente indicando el uso de un rojo a base de insectos. Una resina brillante de color magenta utilizada en la decoración de la cabeza y las patas delanteras de un pequeño unicornio en la cara frontal de la pequeña *Arqueta* (LS2361) carece de la absorbancia característica de muchas resinas de insectos (Material Suplementario S1, Figuras S6 y S7). En su lugar, esta resina sólo presenta puntos de inflexión en aprox. 585 nm. Las patas traseras y posteriores, sin embargo, exhiben firmas espectrales clásicas, aunque débiles, de una resina a base de color rojo insecto con absorbancia máxima a 524 y 564 nm. Fonseca y sus coautores han demostrado que en aplicaciones suficientemente espesas de pinturas que contienen cochinilla, las características de absorbancia a 520 y 560 nm, típicamente utilizadas en la identificación de rojos a base de insectos, desaparecen [47].

En el *Cofre* (LS2067) aparece una resina de color rojo vibrante y en gran medida carece de rasgos de absorción correspondientes a un rojo de insecto. En su lugar, la resina roja se absorbe uniformemente por debajo de uno 580 nm antes de aumentar su reflectancia. Sin embargo, en algunas áreas rojas, hay bandas de absorción discernibles, aunque débiles, correspondientes a la cochinilla (Material Suplementario S1, Figura S1). Las mediciones XRF de los detalles que llevan esta resina de color rojo indicaron la presencia de mercurio, aunque posiblemente esté relacionado con el uso de calomelano, también identificado en otras partes de este objeto, en lugar de un rojo a base de mercurio como el bermellón. Vale

la pena señalar que, hasta la fecha, solo ha habido referencias limitadas al uso de bermellón en objetos que contienen resinas de *mopa mopa* [31,40,49,50]. Incluso con la información adicional que ofrece el análisis XRF, no es posible identificar de manera inequívoca la naturaleza de estas resinas de color rojo.

El índigo se utiliza en combinación con rojos a base de insectos para producir resinas de colores malva y violeta. Por ejemplo, el análisis FORS de un detalle floral en la tapa de la pequeña *Arqueta* (LS2361) arroja firmas de índigo, con un punto de inflexión a 700 nm, como de dos bandas de absorción características a 519 y 560 nm, correspondientes a un colorante rojo a base de insecto. Otros datos RIS de los paneles frontal y lateral de la *Arqueta* indican el uso de colorantes rojos a base de insectos en varios elementos ilustrativos. De manera similar a la influencia de los colorantes amarillos en las propiedades de reflectancia del índigo que se ha comentado anteriormente, las mezclas de colorantes rojos e índigo también conservan a menudo las propiedades individuales del índigo. Sin embargo, a diferencia del comportamiento de enmascaramiento del índigo en la identificación de colorantes amarillos, las propiedades de absorbancia del colorante rojo todavía son observables ocasionalmente [43,51]. Por ejemplo, una resina de color granate aparece en algunos detalles del *Escritorio* (LS2000) y presenta tres bandas de absorbancia a 520, 560 y 655 nm, así como dos puntos de inflexión a 580 y 700 nm (Figura 16, trazos rojos y amarillos). Estas características espectrales son posiblemente indicativas de la mezcla de índigo y un rojo a base de insectos en la resina.

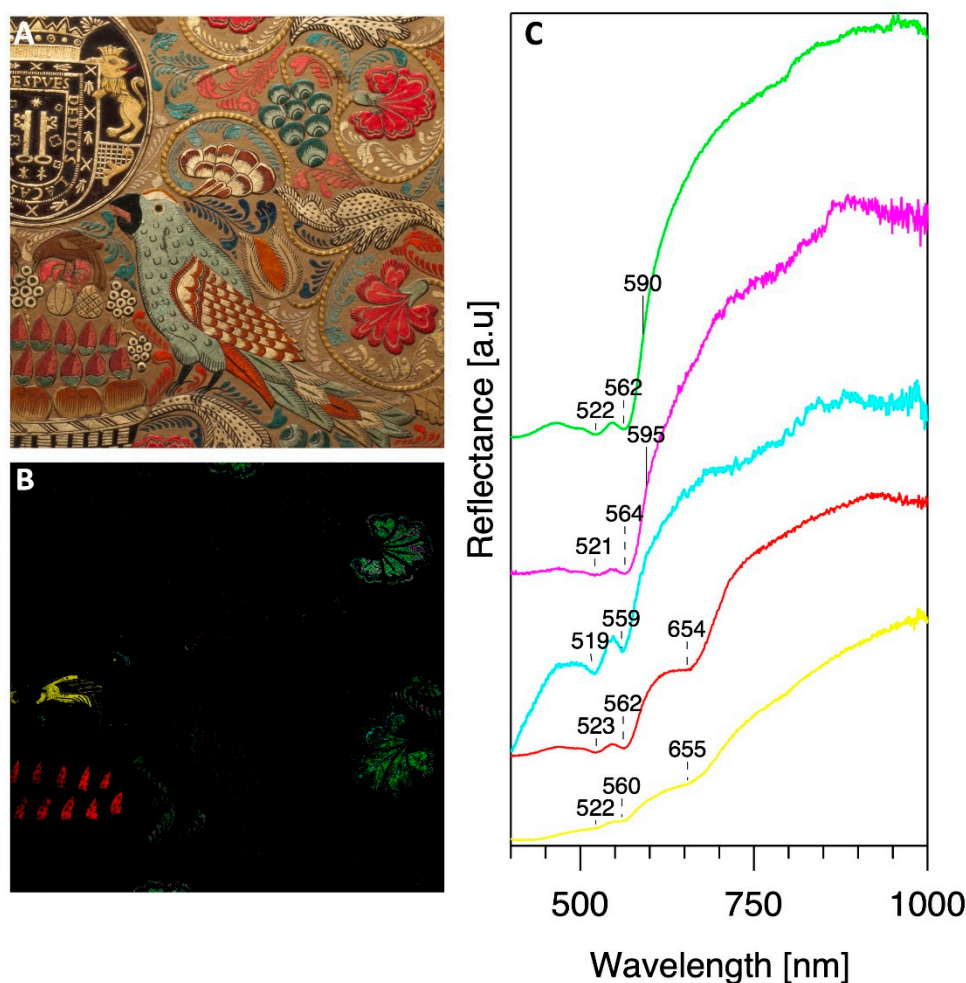

**Figura 16.** (A) Área analizada por RIS para *Escritorio* (LS2000). (B) Imagen compuesta para la misma área que ilustra la distribución de varias resinas de color rojo, rosa y marrón con cada miembro final mostrado en un color diferente, y (C) espectros correspondientes de los miembros finales mostrados en los mismos colores (es decir, las regiones de color rojo en (B) corresponden a la curva de color

---

rojo en (C)). Espectros desplazados para mayor claridad. Todos estos colorantes parecen preparados de manera similar con un colorante rojo de insecto, presumiblemente cochinilla.

#### 3.2.4. Amarillo y naranja

Los colorantes amarillos son notoriamente difíciles de analizar, y esos desafíos sólo se ven agravados aquí por la escasez de información escrita sobre los materiales utilizados en la Colombia precolonial. Humboldt informó que la raíz de la flor en polvo de *Escobedia scabrifolia* se utilizaba en la producción de resinas amarillas [34]. Sin embargo, el análisis previo de HPLC-DAD de una incrustación amarilla en una calabaza colombiana no fue consistente con *E. scabrifolia* [22]. Hasta la fecha, evidencia analítica de colorantes procedentes de *E. scabrifolia* no han sido reportados en lacas colombianas. Las referencias históricas también sugieren que el colorante se utilizó ampliamente como colorante alimentario [52]. Aunque no se menciona explícitamente en los relatos de Humboldt, la producción de resina naranja podría lograrse mediante la mezcla de colorantes rojos y amarillos. Sin embargo, como se mencionó anteriormente, aquí no hay evidencia de un rojo de origen animal, como se ha observado en los otros objetos. En cambio, los espectros FORS recopilados del grifo central y una de las figuras barbudas en la superficie del *Tablero de mesa* (LS2447) están asociados con amplios puntos de inflexión de aprox. 660 nm. De manera similar, las resinas de color naranja en el *Escritorio* (LS2000) y la *Arqueta* pequeña (LS2361) carecen de evidencia clara de un rojo de origen animal y a menudo presentan absorbancias similares a las resinas de color amarillo (Figuras S2-9 de Material Suplementario S1). El espectro FTIR de la muestra S2, una resina de color naranja recogida de la superficie del *Tablero* (LS2447), está dominada en gran medida por firmas espectrales correspondientes a la resina incolora (Figura 17A). Sin embargo, son evidentes nuevos rasgos espectrales, no presentes en la resina incolora, que se asignan tentativamente a una resina de color amarillo. Los picos en 3405, 1660, 1610, 1521, 1320, 1260, 1198, 1014, 840 y 825  $\text{cm}^{-1}$  y el aumento de intensidad de las bandas en 1170 y 1454  $\text{cm}^{-1}$  son consistentes con la quercitrina [53,54] o un colorante similar al quercitrón, un colorante amarillo derivado de la corteza interna de los robles negros norteamericanos (Material Suplementario S1, Figura S13) [55-57]. La corteza de quercitrón, sin embargo, se introdujo y patentó como colorante natural en 1775 y se exportó por primera vez desde Norteamérica a finales del siglo XVIII [56,58], aunque existen usos documentados anteriores del mismo roble por parte de grupos Indígenas norteamericanos como los pueblos Ojibwe, por ejemplo [59]. Aunque la corteza de quercitrón derivada del roble negro norteamericano (*Quercus velutina*) es poco probable dada su distribución geográfica conocida, hay un roble endémico de Colombia, el roble colombiano (*Quercus humboldtii*), que puede tener o no propiedades colorantes similares. Los estudios de materiales vegetales derivados de especies de *Quercus* a menudo presentan perfiles de composición similares, incluidos los flavonoles quercetina, isorhamnetina y kaempferol y, como tales [60], es posible que los colorantes preparados a partir de estas especies también tengan una composición similar. Sin embargo, los cromóforos responsables del color amarillo del colorante quercitrón, la quercetina y la quercitrina [61], son los cromóforos más comúnmente identificados en los colorantes tipo flavonol [62] y, como tal, el número de colorantes amarillos posiblemente utilizados sigue siendo extenso.

El análisis Raman de la resina de color naranja (muestra S2) presentó picos en 1633(sh), 1606, 1590(sh), 1549, 1440, 1329, 1179, 1114, 943, 785, 640, 605, 579 y 522  $\text{cm}^{-1}$  (Figura 17B). Se observan características espectrales similares en los análisis Raman de quercitrina [53] y quercetina [63-65]. El análisis posterior de la resina de color naranja por LC/MS en modo negativo reveló cantidades detectables de 1-O-cafeoilglicerol (7,2 min), quercetina (12,2 min), kaempferol (14,3 min) y un derivado de quercetina O-metilado, isorhamnetina (14,9 min), ninguno de los cuales se observó en la resina incolora (S5) (Figura 17C). El índigo también se identifica aquí, basándose en la presencia de indigotina (19 min), pero se considera que esté relacionado con la resina azul adyacente a la resina de color naranja. También se observó un compuesto rojo desconocido con un tiempo de retención de 17,5 min que presenta varios máximos de absorbancia a 195, 229, 283 y 462



nm. Como se analiza en otro estudio de Newman y sus coautores, la quercetina y el kaempferol también pueden estar presentes en *E. utilis* y, en menor medida, en *E. pastoensis* [7].

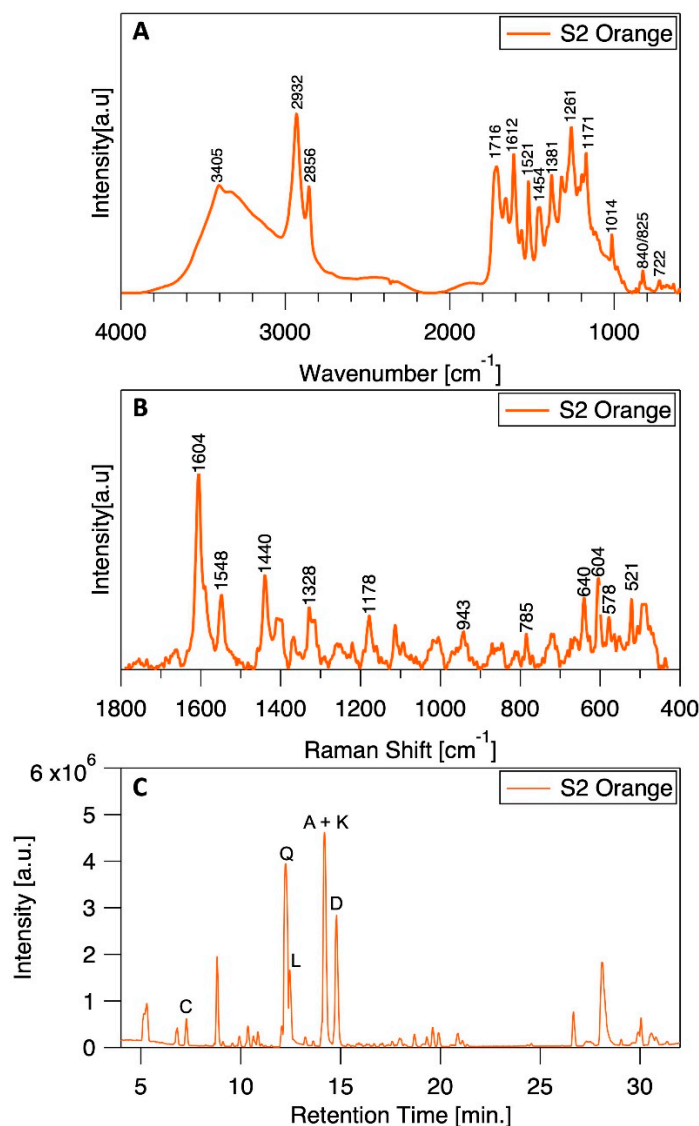

**Figura 17.** (A) Espectro FTIR corregido por la línea de base de la muestra S2, eliminado de un área naranja en la mesa, LS2447. (B) Espectro Raman corregido de línea de base de la muestra S2 (véase el texto para la discusión). (C) Cromatograma de pico base LC/MS (modo de ionización negativa) del extracto de la muestra S2, que contiene 1-O-cafeoilglycerol (C), quercetina (Q), luteolina (L), apigenina (A), kaempferol (K) y diosmetina (D).

Por lo tanto, distinguir entre compuestos relacionados con colorantes, particularmente en el caso de los colorantes amarillos, puede resultar todo un desafío. Sin embargo, aquí, los picos atribuidos a la quercetina y al kaempferol son significativamente más intensos que en la resina incolora, lo que sugiere que estos compuestos están asociados con el tinte amarillo o son indicativos del uso de *E. utilis* en lugar de *E. pastoensis*. Newman y Derrick han identificado quercetina y kaempferol en el componente amarillo de las resinas verdes, aunque la evidencia analítica para esta identificación permanece pendiente de publicación [5]. Los análisis del *Estandarte de Armas* de Francisco Pizarro, utilizado en la conquista del imperio Inca en 1532, también han identificado quercetina-O-rutinósido en colorantes amarillos, naranjas y verdes [66]. Estos resultados ejemplifican cuán ampliamente se producen colorantes compositivamente similares tanto a nivel

---

global como temporal, apareciendo tanto en contextos prehispánicos como en la época colonial, lo que complica nuestra comprensión de la evolución de esta práctica artística. Aunque los análisis FTIR, Raman y LC/MS no permiten la identificación exacta de la fuente del colorante amarillo, es posible inferir que el colorante amarillo puede clasificarse como un flavonoide y, más específicamente, como un flavonol. Además, es posible excluir algunos colorantes como la gualda, la *E. scabrifolia*, la corteza de quercitrón y la caléndula, todos los cuales presentan respuestas espectrales y cromatográficas significativamente diferentes a las de la muestra recolectada del *Tablero*. No se detectó bixina, lo que sugiere que en este caso no se utilizó achiote. Asimismo, la ausencia de quercitrina elimina la posibilidad de que el colorante amarillo derive de la corteza de quercitrón. La dificultad para identificar el posible colorante amarillo, además del aislamiento del tinte de la resina, es un desafío común y solo se ve agravado por la escasez de análisis de materiales similares y de documentación histórica sobre esta práctica cultural. A modo de comparación, también se llevó a cabo un análisis LC/MS de una muestra de referencia de raíz molida de *E. scabrifolia*. Uno de los retos encontrados aquí durante el análisis LC/MS de los componentes del colorante amarillo durante la extracción con  $\text{BF}_3$  fue la degradación de algunos de los compuestos carotenoides relacionados con el colorante. Los carotenoides como la azafrina, que es el principal componente relacionado con el color de *E. scabrifolia* [67], tienden a degradarse con el calor, la luz o las condiciones ácidas. Como tal, es posible que el calentamiento de una resina que contiene este pigmento durante el proceso de fabricación o los efectos combinados de la exposición al  $\text{BF}_3$ , un ácido de Lewis, y la duración prolongada del procedimiento de extracción puedan comprometer o degradar la azafrina [63] e impedir la identificación de este importante compuesto relacionado con el colorante en nuestra muestra. Se realizó una extracción adicional de raíces de *E. scabrifolia* agregando 40  $\mu\text{L}$  de metanol y sonicando durante 5 min a temperatura ambiente. Se detectaron azafrina y aeginetina, marcadores de *E. scabrifolia*, y los resultados de ambos métodos de extracción se compararon con muestras del *Tablero de mesa* (LS2447) (Material Suplementario S1, Tabla S9). Se detectaron compuestos relacionados con flavonoides, antocianinas, carotenoides y otros desconocidos en las referencias de *E. scabrifolia*, pero sólo el ácido ferúlico, un ácido hidrocinámico ubicuo, también estuvo presente en las muestras naranja y verde. Estos resultados confirman que *E. scabrifolia* no era el colorante amarillo utilizado en este objeto.

### 3.2.5. Verde

Aunque se especula que las resinas verdes en la forma artística del *barniz de Pasto* son una mezcla de índigo y *E. scabrifolia* [33], tampoco hay evidencia de que *E. scabrifolia* se haya utilizado aquí. El análisis FORS de una ilustración de una silla de montar de color verde oliva en la tapa redondeada de la *Arqueta* pequeña (LS2361) mostró un máximo de absorbancia a 432 nm posiblemente relacionado con la presencia de un compuesto orgánico amarillo (Figura 18A-B). El análisis XRF en la misma zona sugiere también el uso de colorantes orgánicos, ya que no se pudieron detectar elementos relacionados con pigmentos inorgánicos. El análisis RIS de un colorante similar utilizado en la ilustración de una mujer en la cara frontal de la *Arqueta* (LS2361) ayuda a visualizar la distribución de este colorante en todo el objeto (Figura 18C-E). El espectro de reflectancia de una ilustración en forma de pétalo de color verde más claro, que se cree que se encuentra en un área de restauración, reveló un punto de reflexión a 500 nm con máximos de absorbancia aparente a 648, 730 y 783 nm, que apuntan hacia una mezcla que contiene índigo (Material Suplementario S1, Figura S12).

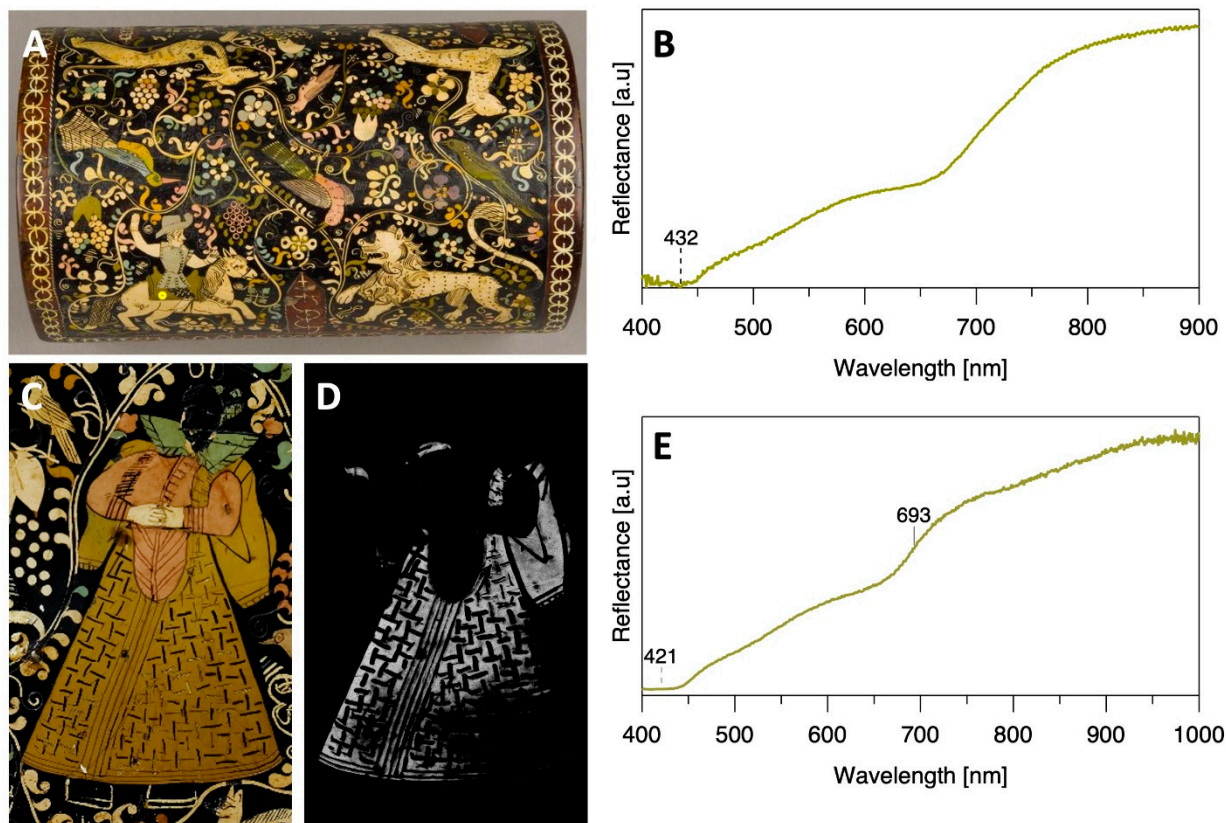

**Figura 18.** (A) Tapa superior de la *Arqueta* (LS2361) con punto de adquisición FORS en la montura verde oliva indicado por un círculo abierto amarillo y (B) espectro de reflectancia correspondiente. (C) Subconjunto del área de análisis de RIS en la cara larga y frontal de la *Arqueta* que centra una figura en un textil verde oliva de color similar, con (D) distribución de miembros finales del RIS de este color verde oliva y (E) espectro de miembros finales correspondiente.

El análisis XRF de la resina verde del *Tablero de mesa* (LS2447) recogidas de un elemento floral central de color verde oliva sugirió la presencia de un colorante orgánico, ya que no se identificó cobre ni hierro. El análisis FTIR posterior de esta resina (S3) fue en gran medida consistente con la resina naranja recogida del mismo objeto, lo que sugiere que se usa un colorante similar, presumiblemente amarillo, en ambas áreas (Figura 19A). El análisis Raman de las resinas verdes sufrió fuertemente de fluorescencia de fondo y en gran medida careció de características, aparte de características espectrales débiles a ca. 1605, 1440 y 600  $\text{cm}^{-1}$  que corresponden a los picos más intensos identificados en la resina naranja comentada anteriormente (Figura 19B). Informes anteriores han indicado que los colorantes verdes encontrados en objetos que contienen resinas de *mopa mopa* eran ocasionalmente inorgánicos, incluido el resinato de cobre, otros verdes a base de cobre o el azul de Prusia [31,69]. Sin embargo, los análisis de otros objetos producidos en la forma de arte *barniz de Pasto* han informado que una mezcla de un azul a base de indigotina y un colorante orgánico amarillo no identificado para producir resinas verdes [5,22]. El análisis LC/MS de la resina verde confirmó la presencia de indigotina, según su perfil UV-Vis característico, y un componente amarillo con una composición similar al amarillo utilizado para producir la resina naranja (S2) mencionada anteriormente. Específicamente, el análisis LC/MS de la muestra verde indicó la presencia de 1-O-cafeoilglicerol, quercetina, kaempferol e isorhamnetina en el componente del colorante amarillo (Figura 19C). Un compuesto adicional eluido a los 19 minutos fue consistente con la indigotina, lo que respalda los resultados de los análisis FORS, Raman y FTIR.

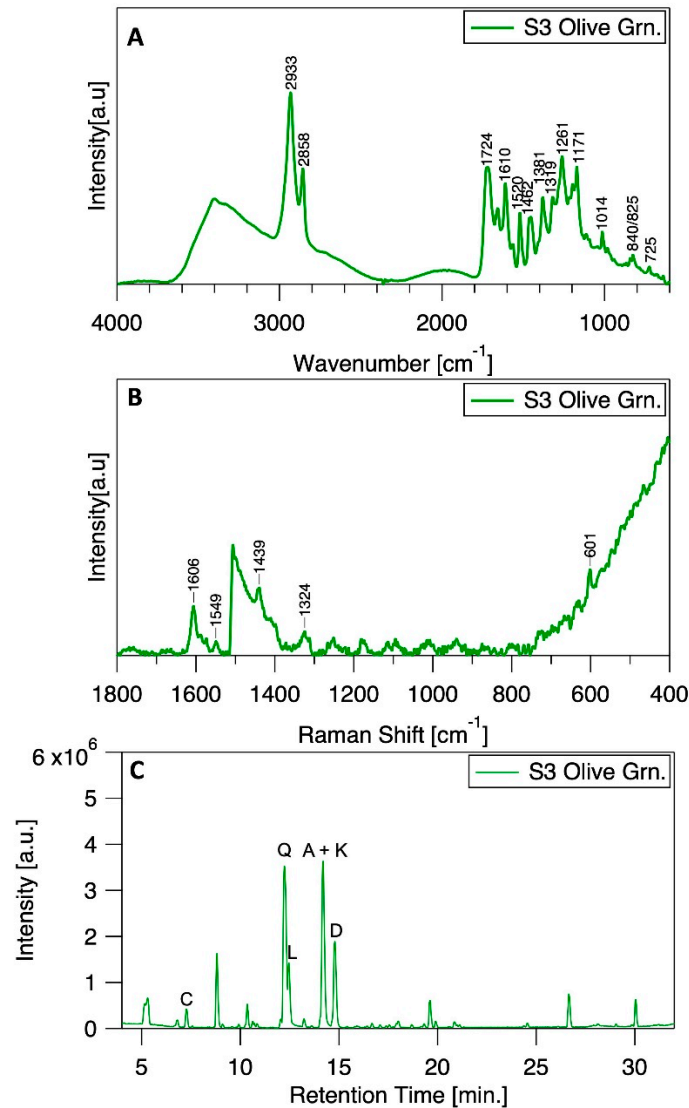

**Figura 19.** (A) Espectro FTIR corregido por la línea de base de la muestra S3, eliminado de un área verde en la mesa, LS2447. (B) Espectro Raman corregido desde la línea de base de la muestra S3 (véase el texto para la discusión). (C) Cromatograma de pico base LC/MS (modo de ionización negativa) del extracto de la muestra S3, que contiene 1-O-cafeoilglicerol (C), quercetina (Q), luteolina (L), apigenina (A), kaempferol (K) y diosmetina (D).

### 3.3. Estratigrafía de la decoración

Como ya han demostrado estudios anteriores sobre objetos con *barniz de Pasto* [5,22], las técnicas de fabricación no pueden desentrañarse sin investigar la estratigrafía decorativa. Por lo tanto, se tomaron dos secciones transversales de un objeto con *barniz mate* (LS2447) y un objeto con *barniz brillante* (LS2000) y se examinaron mediante microscopía óptica y electrónica. Bajo luz polarizada, la muestra del objeto de *barniz mate* (muestra S1, Figura 20A), extraída de la flor azul claro del *Tablero de mesa* junto al pavo real en el área izquierda, reveló una estratigrafía compuesta de tres capas: (1) una fina capa de color rojo oscuro - marrón, posiblemente una capa de preparación; (2) una gruesa capa de resina negra (aproximadamente 250  $\mu\text{m}$ ), correspondiente al fondo de toda la mesa, sobre la cual se encuentra (3) una fina capa de resina de color azul claro (de unos 40  $\mu\text{m}$ ) caracterizada por la presencia de partículas blancas dispersas de tamaño variable, no superiores a 25  $\mu\text{m}$  (Figura 20A).



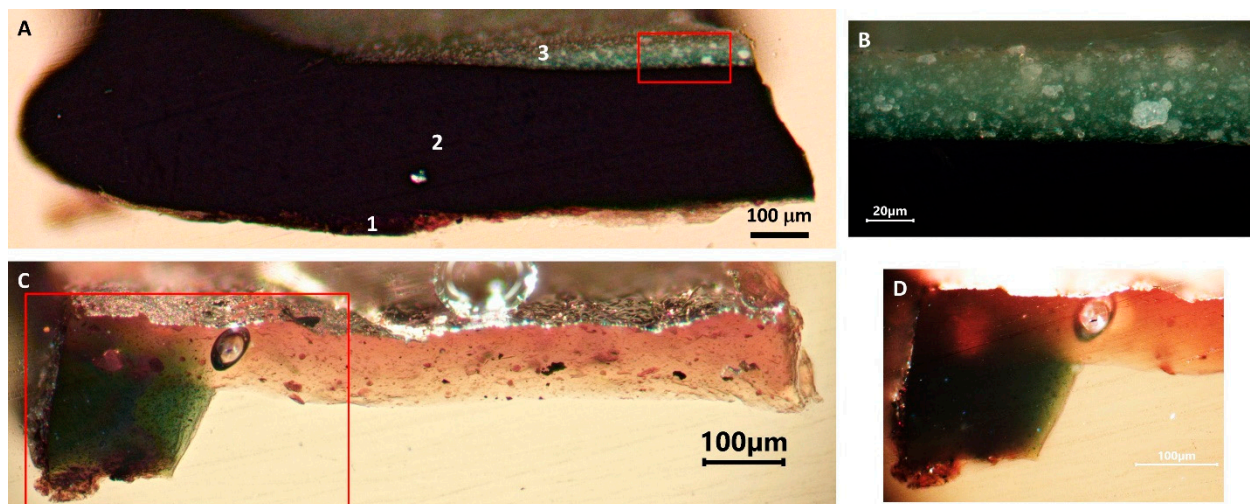

**Figura 20.** (A) Sección transversal S1 extraída de una flor azul claro del *Tablero de mesa* (LS2447) con (B) detalle de la capa azul claro. Los números en (A) se refieren a las capas, ver texto para discusión. (C) Sección transversal S1 extraído de una flor amarilla del *Escritorio* (LS2000) con (D) detalle de toda la secuencia estratigráfica.

El análisis microquímico realizado por MEB-EDX, específicamente en las capas 1 y 3, fue crucial para comprender la naturaleza de los materiales utilizados en estas dos capas. De abajo hacia arriba, las imágenes de BSE revelaron la presencia de dos subcapas de preparación, formando la capa 1 (1a y 1b, Figura 21), compuestas principalmente por partículas minerales. Se diferencian en composición y tamaño de grano, siendo la capa 1a compuesta principalmente por una matriz de grano fino hecha de sulfato de calcio, probablemente yeso, posiblemente mezclado con una arcilla, como se infiere por la detección de silicio (Si), aluminio (Al), magnesio (Mg), sodio (Na), potasio (K) y hierro (Fe). En esta capa también se identificaron pequeñas partículas de cuarzo, óxidos/hidróxidos de hierro, feldespatos (posiblemente plagioclasa), filosilicatos y carbonato de calcio (probablemente calcita), lo que respalda aún más el uso de arcilla natural. En la capa 1a se detectaron frecuentes partículas de barita, un sulfato de bario típicamente asociado a fuentes de yeso. La capa 1b muestra abundantes partículas minerales, que varían entre 10 y 30  $\mu\text{m}$  de tamaño, caracterizadas por una estructura en laminas, típica de los minerales filosilicatos. Su composición muestra la presencia de Si y Mg, lo que concuerda con el talco (Figura 21). Las capas de preparación no se han documentado antes en objetos de *barniz de Pasto*: normalmente, la película de resina transparente o coloreada se aplica directamente sobre el sustrato de madera [5,22]. La gruesa capa de resina negra (capa 2) aplicada sobre las capas de preparación tiene un espesor de aproximadamente 210-220  $\mu\text{m}$  y no muestra ningún elemento cromóforo, lo que sugiere el uso de un colorante orgánico. Finalmente, la capa opaca de color azul claro (capa 3, Material Suplementario S1, Figura S14B) que completa la estratigrafía de esta muestra reveló la presencia de partículas bastante abundantes de un compuesto que contiene plomo, probablemente blanco de plomo, cuya distribución se midió mediante mapeo EDX (Material Suplementario S1, Figura S14C). La práctica de agregar blanco de plomo en polvo (*albayalde*) a resinas teñidas para aclarar tonos y obtener un efecto mate ha sido probada en objetos de *barniz de Pasto* del período colonial [5,18-19].

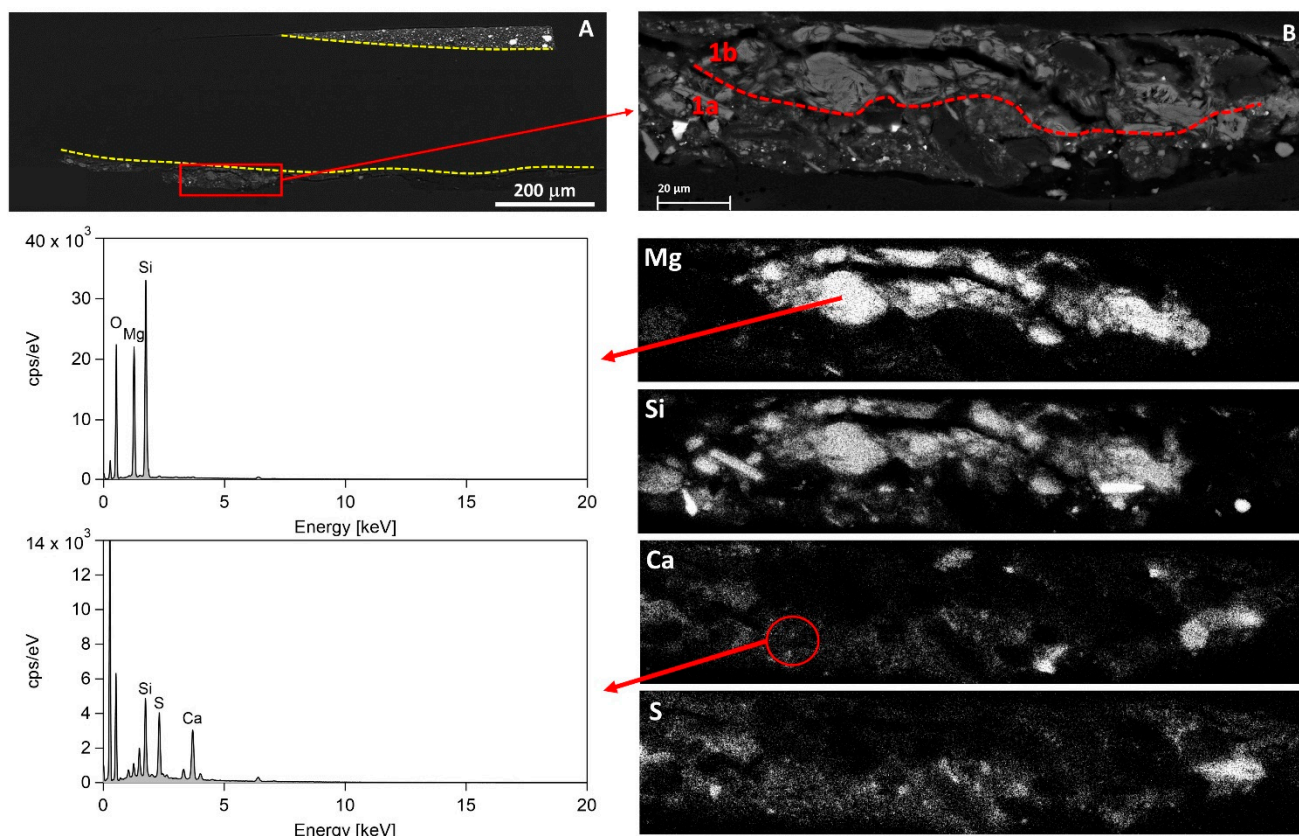

**Figura 21.** (A) Imagen BSE de la sección transversal S1 desde el *Tablero de mesa* (LS2447). El rectángulo rojo indica la capa de fondo; (B) Imagen BSE ampliada de la capa de fondo, con dos capas separadas de diferentes composiciones y tamaños de grano claramente visibles. Las distribuciones elementales de magnesio, silicio, calcio y azufre se informan a continuación, así como los análisis EDX de una partícula de silicato de magnesio, probablemente talco, y de un área rica en calcio y silicio, posiblemente debido a una mezcla de sulfato de calcio (probablemente yeso) y una arcilla de grano muy fino.

La sección transversal S2 fue eliminada del lado izquierdo de LS2000, el *Escritorio* fechado en 1684, junto a una pérdida en la flor amarilla y plateada. La estratigrafía examinada bajo el microscopio óptico cuenta con cuatro capas: (1) una capa marrón, (2) una lámina de resina verde de 200  $\mu\text{m}$  de espesor, (3) una lámina de resina naranja de 100  $\mu\text{m}$  de espesor y (4) una hoja de plata de 2  $\mu\text{m}$  de espesor en la parte superior (Figura 20C-D). Se empleó MEB-EDX para investigar la naturaleza de la capa 1 y la composición de la hoja de plata; la capa 1 aparece como un agregado de partículas, principalmente compuestas de cuarzo, óxidos/hidróxidos de hierro, feldespatos (posiblemente plagioclasa), filosilicatos y carbonato de calcio (probablemente calcita). En general, la composición de esta capa es muy similar a la capa 1a a base de arcilla y yeso descrita para la muestra S1. La hoja de plata (capa 4) está compuesta por plata casi pura que contiene trazas de mercurio y baja cantidad de cloro, cuya presencia podría estar relacionada con los cloruros de plata desarrollados como productos de degradación. Exámenes anteriores de este objeto [7-8] describieron una estratigrafía ligeramente diferente, que comprendía tres capas, incluida una capa transparente e incolora que se adhería al sustrato de madera, una hoja de plata encima y una capa de acabado generalmente hecha de un material teñido, resina transparente. Sin embargo, nunca se analizaron secciones transversales para este objeto previamente.

#### 4. Conclusiones

El estudio de estos cinco objetos de *barniz de Pasto* en la colección del HSML arrojó algunos resultados inesperados que merecen una investigación más profunda. Basándose

---

en trabajos previos de estos y otros investigadores, la expectativa era encontrar calomelanos utilizados en la mayoría de los motivos de color crema de estos objetos, todos los cuales datan del siglo XVII. Se suponía que el calomelano era un pigmento indígena, ya que rara vez se ha encontrado en las obras de arte europeas. Se creía que el blanco de plomo, el uso predominante de pigmento blanco en las obras europeas había sido introducido por los españoles y, por lo tanto, aparecería en objetos posteriores o en aquellos hechos específicamente para mecenas españoles. En cambio, los resultados muestran un uso inconsistente tanto del calomelano como del blanco de plomo. En algunos objetos sólo se utiliza calomelano, por ejemplo, en la *Arqueta* (LS2361) y el *Cofre* (LS2067); se encontró blanco de plomo solo en el *Tablero de mesa* (LS2447); en el *Escritorio* (LS2000) se utilizó tanto blanco de plomo como calomelano. Únicamente hasta el momento el *Escritorio* (LS2446) sólo contiene pigmentos orgánicos. A pesar de los diferentes pigmentos blancos utilizados, parece que la paleta de colorantes orgánicos se mantuvo en gran medida constante. Los análisis FTIR, Raman y LC/MS de las resinas verdes y naranjas recolectadas del *Tablero* (LS2447) presentaron respuestas espectrales similares, lo que sugiere el uso del mismo colorante en ambos casos, probablemente un colorante flavonoide amarillo. Aunque la identificación específica de estos tintes amarillos sigue siendo una cuestión abierta, la LC/MS permite la exclusión de algunos colorantes, como la caléndula, *E. scabrifolia* o el palo fustete, por ejemplo, lo que representa un paso importante hacia la identificación de los colorantes amarillos utilizados en objetos de *barniz de Pasto*. Además, el componente rojo de la resina de color naranja sigue siendo desconocido, no es consistente con la cochinilla por LC/MS, lo que respalda la evidencia de FORS que indica contra el uso de este colorante en áreas de color rojo del *Tablero de mesa* (LS2447). Los análisis FORS y RIS sugirieron que todas las resinas de color negro, azul y verde estudiadas aquí contienen índigo, lo que fue confirmado posteriormente por FTIR, Raman y LC/MS. RIS y FORS también fueron útiles para la indicación de pigmentos lacustres producidos a partir de tintes de antraquinona, muy probablemente el tinte de insecto cochinilla en la mayoría de las resinas de color rojo. Sin embargo, en algunos objetos, las firmas de este colorante rojo fueron débiles o están ausentes, lo que posiblemente indique una receta diferente o el uso de un colorante completamente diferente. Este trabajo representa un conjunto de datos importante en la exploración de la evolución de las prácticas artísticas en torno al uso de resinas coloreadas de *mopa mopa* y, como se analizó anteriormente, desafía el uso de algunos pigmentos específicos como marcadores temporales. El uso de calomelano en estos objetos no parece respaldar la hipótesis de que su uso fuera un marcador cronológico en el siglo XVII, pero esto también puede reflejar las características específicas del grupo de objetos estudiados. Sin embargo, junto con investigaciones anteriores, los resultados también confirman que el uso del blanco de mercurio tampoco se limitaba a un taller o técnica específica. A medida que la literatura relacionada con el *barniz de Pasto* continúe creciendo, será posible investigar y comprender si las influencias indígenas y coloniales se encuentran y se superponen y dónde.

**Materiales complementarios:** La siguiente información de respaldo se puede descargar en: [www.mdpi.com/xxx/s1](http://www.mdpi.com/xxx/s1). Se proporciona la siguiente información de respaldo: Material Suplementario S1: tablas e imágenes no incluidas en el texto principal, con su traducción al español; Material Suplementario S2: Traducción al español de este artículo.

**Contribuciones por autor:** Conceptualización, M.K., E.B., and A.C.M.; metodología, E.B. and F.P.; recopilación de datos, E.B., F.P., R.R., A.C.M. y M.G.M.A.; investigación, M.K., E.B., A.C.M., M.G.M.A., F.P., and R.R.; redacción: preparación del borrador original, M.K., E.B. y A.C.M.; redacción: revisión y edición, todos los autores. Traducción al español: E.B. y M.G.M.A. Todos los autores han leído y aceptado la versión publicada del manuscrito.

**Financiación:** Esta investigación fue posible gracias a Scientific Research Partnerships, un programa del Museo Metropolitano de Arte. El apoyo a este programa fue proporcionado por subvenciones de la Fundación Mellon (G-2108-11314) y la Fundación Alfred P. Sloan (G-2021-16948).

**Declaración de disponibilidad de datos:** Todos los datos generados durante este estudio se incluyen en este artículo publicado.

**Agradecimientos:** Los autores agradecen enormemente a Hélène Fontoira Marzin, HSML, por su continuo apoyo y a Mitchell A. Coddington por compartir sus conocimientos.

**Conflictos de intereses:** Los autores declaran no tener ningún conflicto de intereses.

## Referencias

1. Fernández de Piedrahita, L. *Historia General de las Conquistas del Nuevo Reyno de Granada*; J.B. Verdussen: Antwerp, Belgium, 1688; p. 360.
2. Juan, J.; de Ulloa, A. *Relación Histórica del Viaje a la América Meridional*; Antonio Marín: Madrid, Spain, 1748; Volume 2, p. 470.
3. Coddington, M.A. The Lacquer Arts of Latin America. In *Made in the Americas: The New World Discovers Asia*; Carr, D., Ed.; MFA Publications: Boston, MA, USA, 2015.
4. Álvarez-White, M.C. El barniz de Pasto: Reflejo de la naturaleza. In *Naturaleza y Paisaje, Proceedings of the IX Encuentro Internacional sobre Barroco, Buenos Aires, Argentina, 14–17 November 2017*; Avegno, M.C., Maurizio, P., Eds.; Fundación Visión Cultural: La Paz, Bolivia, 2019; pp. 339–346.
5. Álvarez-White, M.C.; Cohen, D.; Fernández, M.O. The Splendour of Glitter: Silver Leaf in barniz de Pasto Objects. *Heritage* **2023**, *6*, 6581–6595.
6. Newman, R.; Kaplan, E.; Derrick, M. Mopa mopa: Scientific analysis and history of an unusual South American resin used by the Inka and artisans in Pasto, Colombia. *J. Am. Inst. Conserv.* **2015**, *54*, 123–148.
7. Newman, R.; Kaplan, E.; Álvarez-White, M.C. The Story of Elaeagia Resin (Mopa-Mopa), So Far. *Heritage* **2023**, *6*, 4320–4344.
8. Derrick, M.; Kaplan, E.; Newman, R. Mopa-mopa: Una extraordinaria resina aglutinante andina. In *Materia Americana*, 1st ed.; Siracusano, G., Rodríguez Romero, A., Eds.; EDUNTREF: Buenos Aires, Argentina, 2020; pp. 71–89.
9. Kawamura, Y. The Art of Barniz de Pasto and Its Appropriation of Other Cultures. *Heritage* **2023**, *6*, 3292–3306.
10. Zabía de la Mata, A. New Contributions Regarding the Barniz de Pasto Collection at the Museo de América, Madrid. *Heritage* **2024**, *7*, 667–682.
11. López Pérez, M.d.P. Reflections on the Forms and Arrangements of Surface Images in the Art of Barniz de Pasto, from the 16th to the 19th Century. *Heritage* **2023**, *6*, 5424–5441.
12. Zabía de la Mata, A. El arte del barniz de Pasto en la colección del Museo de América de Madrid. *An. Mus. Am.* **2020**, *28*, 81–98.
13. Kawamura, Y. El barniz de Pasto y las lacas de Japón: Contexto histórico de sus Encuentros. *An. Mus. Am.* **2020**, *28*, 99–108.
14. López Pérez, M. Imágenes y tradición a través de los objetos recubiertos con barniz de Pasto. Una aproximación a su interpretación. *An. Mus. Am.* **2020**, *28*, 127–146.
15. Kawamura, Y. Encuentro multicultural en el arte de barniz de Pasto o la laca del Virreinato del Perú. *Hist. Soc.* **2018**, *35*, 87–112.
16. Creixell Cabeza, R.M. Entre el viejo y el nuevo mundo: El escritorio de barniz de Pasto de la colección de artes decorativas de The Hispanic Society of America. *Res. Mobilis* **2014**, *3*, 119–131.
17. Burgio, L.; Melchar, D.; Strekopytov, S.; Peggie, D.A.; Melchiorre Di Crescenzo, M.; Keneghan, B.; Najorka, J.; Goral, T.; Gorbout, A.; Clark, B. Identification, characterisation and mapping of calomel as a previously undocumented pigment from South America, and its use of a barniz de Pasto cabinet at the Victoria and Albert Museum. *Microchem. J.* **2018**, *143*, 220–227.
18. Romero, R.; Illán, A.; Bondía, C. Consideraciones preliminares sobre la técnica y restauración de objetos de barniz de Pasto o mopa-mopa. *An. Mus. Am.* **2020**, *28*, 157–169.
19. Sanchez Ledesma, A. Análisis de los materiales de una arqueta decorada con barniz de Pasto, perteneciente a la colección del Museo de América de Madrid. *An. Mus. Am.* **2020**, *28*, 170–179.
20. Crippa, M.; Legnaioli, S.; Kimbriel, C.; Ricciardi, P. New evidence for the intentional use of calomel as a white pigment. *J. Raman Spectrosc.* **2020**, *51*, 15–22.
21. Gliozzo, E. Pigments—Mercury-Based Red (Cinnabar-Vermilion) and White (Calomel) and Their Degradation Products. *Archaeol. Anthropol. Sci.* **2021**, *13*, 210.
22. Pozzi, F.; Basso, E.; Katz, M. In search of Humboldt's colors: Material and techniques of a seventeenth century lacquered gourd from Colombia. *Herit. Sci.* **2020**, *8*, 101.
23. Humphrey, N.; Burgio, L.; Melchar, D. One small corner of the Viceroyalty in South Kensington: Barniz de Pasto at the Victoria and Albert Museum, London. *An. Mus. Am.* **2020**, *28*, 147–156.
24. Coddington, M.A., former HSML, New York, NY, USA, Personal communication, 2023.
25. Insuasty, B.; Argoti, J.C.; Altarejos, J.; Cuenca, G.; Chamorro, E. Caracterización fisicoquímica preliminar de la resina del mopa-mopa (*Elaeagia pastoensis* Mora), barniz de Pasto. *Sci. Tech. Año XIII* **2007**, *33*, 365–368.
26. Wenig, P.; Odermatt, J. OpenChrom: A cross-platform open source software for the mass spectrometric analysis of chromatographic data. *BMC Bioinform.* **2010**, *11*, 405.
27. Wallace, W. Mass Spectra. In *NIST Chemistry WebBook, NIST Standard Reference Database Number 69*; Linstrom, P.J., Mallard, W.G., Eds.; National Institute of Standards and Technology. Available online: <https://webbook.nist.gov/chemistry/> (accessed on 21 February 2024).
28. Radpour, R.; Gates, G.A.; Kakoulli, I.; Delaney, J.K. Identification and mapping of ancient pigments in a Roman Egyptian funerary portrait by application of reflectance and luminescence imaging spectroscopy. *Herit. Sci.* **2022**, *10*, 8.



- 
29. Cui, R.; Yu, H.; Xu, T.; Xing, X.; Cao, X.; Yan, K.; Chen, J. Deep learning in medical hyperspectral images: A review. *Sensors* **2022**, *22*, 9790.
30. Schneider, C.A.; Rasband, W.S.; Eliceiri, K.W. NIH Image to ImageJ: 25 years of image analysis. *Nat. Methods* **2012**, *9*, 671–675.
31. Newman, R.; Derrick, M. Painted Qero cups from the Inka and colonial periods in Peru: An analytical study of pigments and media. *MRS Proc.* **2002**, *712*, 291–302.
32. Gallois, N.; Templier, J.; Derenne, S. Limitations in interpreting TMAH thermochemolysis of natural organic matter via consideration of glycine and alanine derivatives. *Org. Geochem.* **2010**, *41*, 1338–1340.
33. Melchar, D.; Burgio, L.; Fernandez, V.; Keneghan, B.; Newman, R. A collaborative, multidisciplinary and multi-analytical approach to the characterisation of barniz de Pasto objects from the V&A collections. In *Transcending Boundaries: Integrated Approaches to Conservation, Proceedings of the ICOM-CC 19th Triennial Conference Preprints, Beijing, China, 17–21 May 2021*; ICOM-CC: Paris, France, 2021.
34. von Humboldt, A. Sobre el barniz de Pasto. In *Alexander von Humboldt en Colombia: Extractos de sus Diarios*; Publicismo y Ediciones: Bogotá, Colombia, 1982.
35. De Ferri, L.; Tripodi, R.; Martignon, A.; Ferrari, E.S.; Lagrutta-Diaz, A.C.; Vallotto, D.; Pojana, G. Non-invasive study of natural dyes on historical textiles from the collection of Michelangelo Guggenheim. *Spectrochim. Acta A* **2018**, *204*, 548–567.
36. Leona, M.; Casadio, F.; Bacci, M.; Picollo, M. Identification of the pre-Columbian pigment Maya blue on works of art by noninvasive UV-vis and Raman spectroscopic techniques. *J. Am. Inst. Conserv.* **2004**, *43*, 39–54.
37. Monahan, A.R.; Kuder, J.E. Spectroscopic differences between crystalline and amorphous phases of indigo. *J. Org. Chem.* **1972**, *37*, 4182–4184.
38. Curley, A.N.; Thibodeau, A.M.; Kaplan, E.; Howe, E.; Pearlstein, E.; Levinson, J. Isotopic composition of lead white pigments on qeros: Implications for the chronology and production of Andean ritual drinking vessels during the colonial era. *Herit. Sci.* **2020**, *8*, 72.
39. Summerour, R.; Giaccai, J.; Webb, K.; Mori, C.; Little, N. Technical Analysis of Four Archaeological Andean Painted Textiles. *Nuevo Mundo Mundos Nuevos*. Available online: <http://journals.openedition.org/nuevomundo/69257> (accessed on 21 February 2024).
40. Pearlstein, E.; Kaplan, E.; Howe, E.; Levinson, J. Technical analyses of painted Inka and Colonial qeros. *Objects Spec. Group Postprints* **1999**, *6*, 94–111.
41. Ricci, M.; Lofrumento, C.; Becucci, M.; Castellucci, E.M. The Raman and SERS spectra of indigo and indigo-Ag<sub>2</sub> complex: DFT calculation and comparison with experiment. *Spectrochim. Acta A* **2018**, *188*, 141–148.
42. Niemeyer, H.M.; Agüero, C. Dyes used in pre-Hispanic textiles from the Middle and Late Intermediate periods of San Pedro de Atacama (northern Chile): New insights into patterns of exchange and mobility. *J. Archaeol. Sci.* **2015**, *57*, 14–23.
43. Aceto, M.; Agostino, A.; Fenoglio, G.; Idone, A.; Gulmini, M.; Picollo, M.; Ricciardi, P.; Delaney, J.K. Characterisation of colourants on illuminated manuscripts by portable fibre optic UV-visible-NIR reflectance spectrophotometry. *Anal. Methods* **2014**, *6*, 1488–1500.
44. Pearlstein, E.; MacKenzie, M.; Kaplan, E.; Howe, E.; Levinson, J. Tradition and Innovation: Cochineal and Andean Keros. In *A Red like No Other: How Cochineal Colored the World: An Epic Story of Art, Culture, Science, and Trade*; Padilla, C., Anderson, B.C., Eds.; Skira Rizzoli: New York, NY, USA, 2015; pp. 44–51.
45. Pearlstein, E. Cochineal and Andean Qeros: Technology and Style. In *Materia Americana: The Body of Spanish American Images: 16th to Mid-19th Centuries*; Siracusano, G., Rodríguez Romero, A., Eds.; Universidad Nacional de Tres de Febrero: Sáenz Peña, Argentina, 2020; pp. 59–70.
46. De Rosso, V.V.; Zerlotti Mercadante, A. Dyes in South America. In *Handbook of Natural Colorants*; Bechtold, T, Mussak, R., Eds; John Wiley & Sons, Ltd: Chichester, UK, 2009; pp. 53–64.
47. Fonseca, B.; Schmidt Patterson, C.; Ganio, M.; MacLennan, D.; Trentelman, K. Seeing red: Towards an improved protocol for the identification of madder- and cochineal-based pigments by fiber optics reflectance spectroscopy (FORS). *Herit. Sci.* **2019**, *7*, 92.
48. Saltzman, M. The Identification of Dyes in Archaeological and Ethnographic Textiles. In *Archaeological Chemistry II, Advances in Chemistry Series*; Carter, G.F, Ed.; ACS Publications: Washington, DC, USA, 1978; Volume 171, pp. 172–185.
49. Howe, E.; Kaplan, E.; Newman, R.; Frantz, J.H.; Pearlstein, E.; Levinson, J.; Madden, O. The occurrence of a titanium dioxide/silica white pigment on wooden Andean qeros: A cultural and chronological marker. *Herit. Sci.* **2018**, *6*, 41.
50. Young, M.E.; Kaplan, E. Cinnabar traditions across the ancient Central Andes: Insights from the National Museum of the American Indian collections. *Archaeol. Anthropol. Sci.* **2023**, *15*, 182.
51. Maynez-Rojas, M.A.; Casanova-González, E.; Ruvalcaba-Sil, J.L. Identification of natural red and purple dyes on textiles by fiber-optics reflectance spectroscopy. *Spectrochim. Acta Part A Mol. Biomol. Spectrosc.* **2017**, *178*, 239–250.
52. Williams, L.O. A yellow food dye—*Escobedia*. *Econ. Bot.* **1970**, *24*, 459.
53. Govindammal, M.; Kannan, S.; Srinivasan, P.; Prasath, M. Quantum chemical calculations, spectroscopic studies and molecular docking investigations of the anti-cancer drug quercitrin with B-RAF inhibitor. *Heliyon* **2022**, *8*, e09539.
54. Kokalj Ladan, M.; Straus, J.; Tavčar Benković, E.; Kreft, S. FT-IR-based method for rutin, quercetin and quercitrin quantification in different buckwheat (*Fagopyrum*) species. *Sci. Rep.* **2017**, *7*, 7226.
55. Ponting, K.G. Important natural dyes of History. *Ind. Archaeol. Rev.* **1978**, *2*, 154–159.
56. Cardon, D. *Natural Dyes*; Sources, Tradition, Technology and Science, Archetype Publications, Ltd.: London, UK, 2007; pp. 199–202.

- 
57. Joshi, S.; Rao, S.G.; Chandrakar, R.; Madan Mohan, S. Use of plant dyes in textiles industries. *Indian J. Life Sci.* **2015**, *5*, 111–114.
  58. Colombini, M.P.; Andreotti, A.; Baraldi, C.; Degano, I.; Łucejko, J.J. Colour fading in textiles: A model study on the decomposition of natural dyes. *Microchem. J.* **2007**, *85*, 174–182.
  59. Smith, H.H. Ethnobotany of the Ojibwe Indians. *Bull. Public Mus. Milwaukee* **1932**, *4*, 327–525.
  60. Şöhretoğlu, D.; Renda, G. The polyphenolic profile of Oak (*Quercus*) species: A phytochemical and pharmacological overview. *Phytochem. Rev.* **2020**, *19*, 1379–1426.
  61. Ferreira, E.S.B.; Hulme, A.N.; McNab, H.; Quye, A. The natural constituents of historical textile dyes. *Chem. Soc. Rev.* **2004**, *33*, 329–336.
  62. Zhang, X.; Boytner, R.; Cabrera, J.L.; Laursen, R. Identification of yellow dye types in pre-Columbian Andean textiles. *Anal. Chem.* **2007**, *79*, 1575–1582.
  63. Cornard, J.P.; Merlin, J.C.; Boudet, A.C.; Vrielynck, L. Structural study of quercetin by vibrational and electronic spectroscopies combined with semiempirical calculations. *Biospectroscopy* **1997**, *3*, 183–193.
  64. García-Bucio, M.A.; Casanova-González, E.; Mitrani, A.; Ruvalcaba-Sil, J.L.; Maynez-Rojas, M.Á.; Rangel-Chávez, I. Non-destructive and non-invasive methodology for the in situ identification of Mexican yellow lake pigments. *Microchem. J.* **2022**, *183*, 107948.
  65. Jurasekova, Z.; Torreggiani, A.; Tamba, M.; Sanchez-Cortes, S.; Garcia-Ramos, J.V. Raman and surface-enhanced Raman scattering (SERS) investigation of the quercetin interaction with metals: Evidence of structural changing processes in aqueous solution and on metal nanoparticles. *J. Mol. Struct.* **2009**, *918*, 129–137.
  66. Badillo-Sanchez, D.A.; Barrocas Dias, C.; Manhita, A.; Schiavon, N. The National Museum of Colombia’s “Francisco Pizarro’s Banner of Arms”: A multianalytical approach to help uncovering its history. *Eur. Phys. J. Plus* **2019**, *134*, 224.
  67. Weedon, B.C.L. Some recent studies on carotenoids and related compounds. *Pure Appl. Chem.* **1973**, *35*, 113–130.
  68. Saini, R.K.; Keum, Y.-S. Carotenoid extraction methods: A review of recent developments. *Food Chem.* **2018**, *240*, 90–103.
  69. Portell, J.D. Colored glazes on silver-gilded surfaces. *Stud. Conserv.* **1992**, *37*, 116–118.

**Disclaimer/Publisher’s Note:** The statements, opinions and data contained in all publications are solely those of the individual author(s) and contributor(s) and not of MDPI and/or the editor(s). MDPI and/or the editor(s) disclaim responsibility for any injury to people or property resulting from any ideas, methods, instructions or products referred to in the content.
