# Supplementary material
Source: MDPI journal article supplement (https://www.mdpi.com/2571-9408/7/5/125)
Supplement: s1 [file s1]

# Supplementary Material S1

## **Seventeenth century *Barniz de Pasto* objects from the collection of the Hispanic Society Museum & Library: materiality and technology**

Elena Basso <sup>1,\*</sup>, Alicia McGeachy <sup>1</sup>, Maria Goretti Mieites Alonso <sup>1</sup>, Federica Pozzi <sup>2</sup>, Roxanne Radpour <sup>3</sup> and Monica Katz <sup>4</sup>

1. Department of Scientific Research, The Metropolitan Museum of Art, 1000 Fifth Avenue, New York, NY 10028, USA; alicia.mcgeachy@metmuseum.org (A.M.); maria.mieitesalonso@metmuseum.org (M.G.M.A.)

2. Centro per la Conservazione ed il Restauro dei Beni Culturali “La Venaria Reale”, Via XX Settembre 18, Venaria Reale, 10078 Turin, Italy; federica.pozzi@ccrvenaria.it

3. Department of Art Conservation, University of Delaware, 303 Old College, Newark, DE 19716, USA; radpour@udel.edu

4. Conservator Emerita, Hispanic Society Museum & Library, 613 W 155th Street, New York, NY 10032, USA; monicakatz@mac.com

\* Correspondence: elena.basso@metmuseum.org

**Table S1.** Summary of *barniz de Pasto* objects studied in this research.

| Objects <sup>†</sup>                                                               | Name                                      | Accession No. | Date     | Medium                                                                                | Dimensions (H cm × W cm × D cm) |
|------------------------------------------------------------------------------------|-------------------------------------------|---------------|----------|---------------------------------------------------------------------------------------|---------------------------------|
|    | <i>Casket</i>                             | LS2361        | 1625-50  | <i>Barniz de Pasto</i>                                                                | 15 × 18 × 8.6                   |
|    | <i>Coffer</i>                             | LS2067        | ca. 1650 | <i>Barniz de Pasto</i> on wood with silver and gold leaf and silver mounts            | 19.2 × 26 × 12.3                |
|    | <i>Tabletop</i>                           | LS2447        | ca. 1643 | <i>Barniz de Pasto</i> lacquer on Spanish cedar ( <i>Cedrela odorata</i> )            | 43.7 × 66 × 1.8                 |
|   | <i>Writing desk (Escritorio)</i>          | LS2446        | ca. 1643 | <i>Barniz de Pasto</i> on Spanish cedar ( <i>Cedrela odorata</i> ) with silver mounts | 20.2 × 39.4 × 35 (Closed)       |
|  | <i>Portable writing desk (Escritorio)</i> | LS2000        | ca. 1684 | <i>Barniz de Pasto</i> lacquer on wood with silver leaf, modern yellow metal hardware | 19 × 36 × 30.5                  |

<sup>†</sup> Images courtesy of the Hispanic Society of America.

**Table S2.** Summary of py-GC/MS analysis of sample S5 collected from uncolored resin of LS2447.

| RT<br>[min] | [M+] | ID                                             | Match | RI   | Related References                |
|-------------|------|------------------------------------------------|-------|------|-----------------------------------|
| 2.32        | 90   | Carbonic acid, dimethyl ester                  | 891   | 620  |                                   |
| 2.50        | 120  | Dimethoxydimethylsilane                        | 922   | 645  |                                   |
| 2.85        | 102  | Methyl isobutyrate?                            | 758   | 684  |                                   |
| 3.9         | 152  | Tetramethyl silicate                           | 878   | 668  |                                   |
| 4.5         | 222  | Cyclotrisiloxane, hexamethyl-                  | 860   | 851  |                                   |
| 4.74        | 117  | Glycine, N,N-dimethyl-, methyl ester           | 937   | 911  |                                   |
| 5.54        |      | N,N-dimethylalanine methyl ester?              |       |      | Gallois et al. Org. Geochem. 2010 |
| 6.48        | 142  | Isobutyl methacrylate?                         | 898   | 960  |                                   |
| 6.60        |      | Unknown (m/z @ 86)                             |       |      |                                   |
| 6.64        |      | Unknown (m/z @ 70, 129, 114, 55)               |       |      |                                   |
| 7.14        | 296  | Cyclotetrasiloxane, octamethyl-                | 920   | 994  |                                   |
| 9.22        |      | Unknown (m/z @ 58)                             |       |      |                                   |
| 9.83        | 161  | Sarcosine, N-methoxycarbonyl-, methyl ester    | 847   | 1150 |                                   |
| 10.45       | 175  | Unknown (m/z @ 58)                             |       |      |                                   |
| 10.63       | 175  | Unknown (m/z @ 116)                            |       |      |                                   |
| 10.69       | 189  | Unknown (m/z @ 58)                             |       |      |                                   |
| 10.89       | 189  | L-aspartic acid, N,N-dimethyl-, dimethyl ester | 840   | 1234 |                                   |
| 11.15       | 189  | Unknown (m/z @ 72)                             |       |      |                                   |
| 11.3        |      | Unknown (m/z @ 72)                             |       |      |                                   |
| 13.05       |      | Unknown (m/z @ 88, 87, 122, 169)               |       |      |                                   |
| 13.29       |      |                                                |       |      |                                   |
| 13.82       | 216  | Unknown (m/z @ 185, 157)                       |       |      |                                   |
| 14.04       | 194  | Dimethyl phthalate                             | 793   | 1454 |                                   |
| 14.12       |      | Unknown (m/z @ 128)                            |       |      |                                   |
| 14.94       | 214  | Lauric acid, methyl ester                      | 688   | 1526 |                                   |
| 17.26       | 242  | Myristic acid, methyl ester                    | 648   | 1725 |                                   |
| 18.02       |      |                                                |       |      |                                   |
| 18.73       |      |                                                |       |      |                                   |
| 19.37       | 270  | Palmitic acid, methyl ester                    | 872   | 1926 |                                   |
| 19.69       | 278  | Dibutyl phthalate?                             | 798   | 1965 |                                   |
| 21.29       | 284  | Stearic acid, methyl ester                     | 864   | 2128 |                                   |
| 22.9        |      |                                                |       |      |                                   |
| 23.67       | 464  | Tetracosane                                    | 723   | 2400 |                                   |
| 24.47       | 352  | Pentacosane                                    | 849   | 2500 |                                   |
| 25.25       | 366  | Hexacosane                                     | 818   | 2600 |                                   |
| 25.89       | 380  | Heptacosane                                    | 775   | 2700 |                                   |
| 26.2        | 382  | Tetracosanoic acid, methyl ester               | 484   | 2730 |                                   |
| 26.71       | 394  | Octacosane                                     | 732   | 2800 |                                   |
| 27.4        | 408  | Nonacosane                                     | 737   | 2900 |                                   |
| 28.07       | 422  | Triacontane                                    | 662   | 3000 |                                   |
| 28.72       | 436  | Hentriacontane                                 | 602   | 3100 |                                   |
| 29.35       | 450  | Dotriacontane                                  | 573   | 3200 |                                   |
| 30.81       | 464  | Trtriacontane                                  | 425   | 3300 |                                   |
| 31.71       | 478  | Tetratriacontane?                              |       | 3400 |                                   |

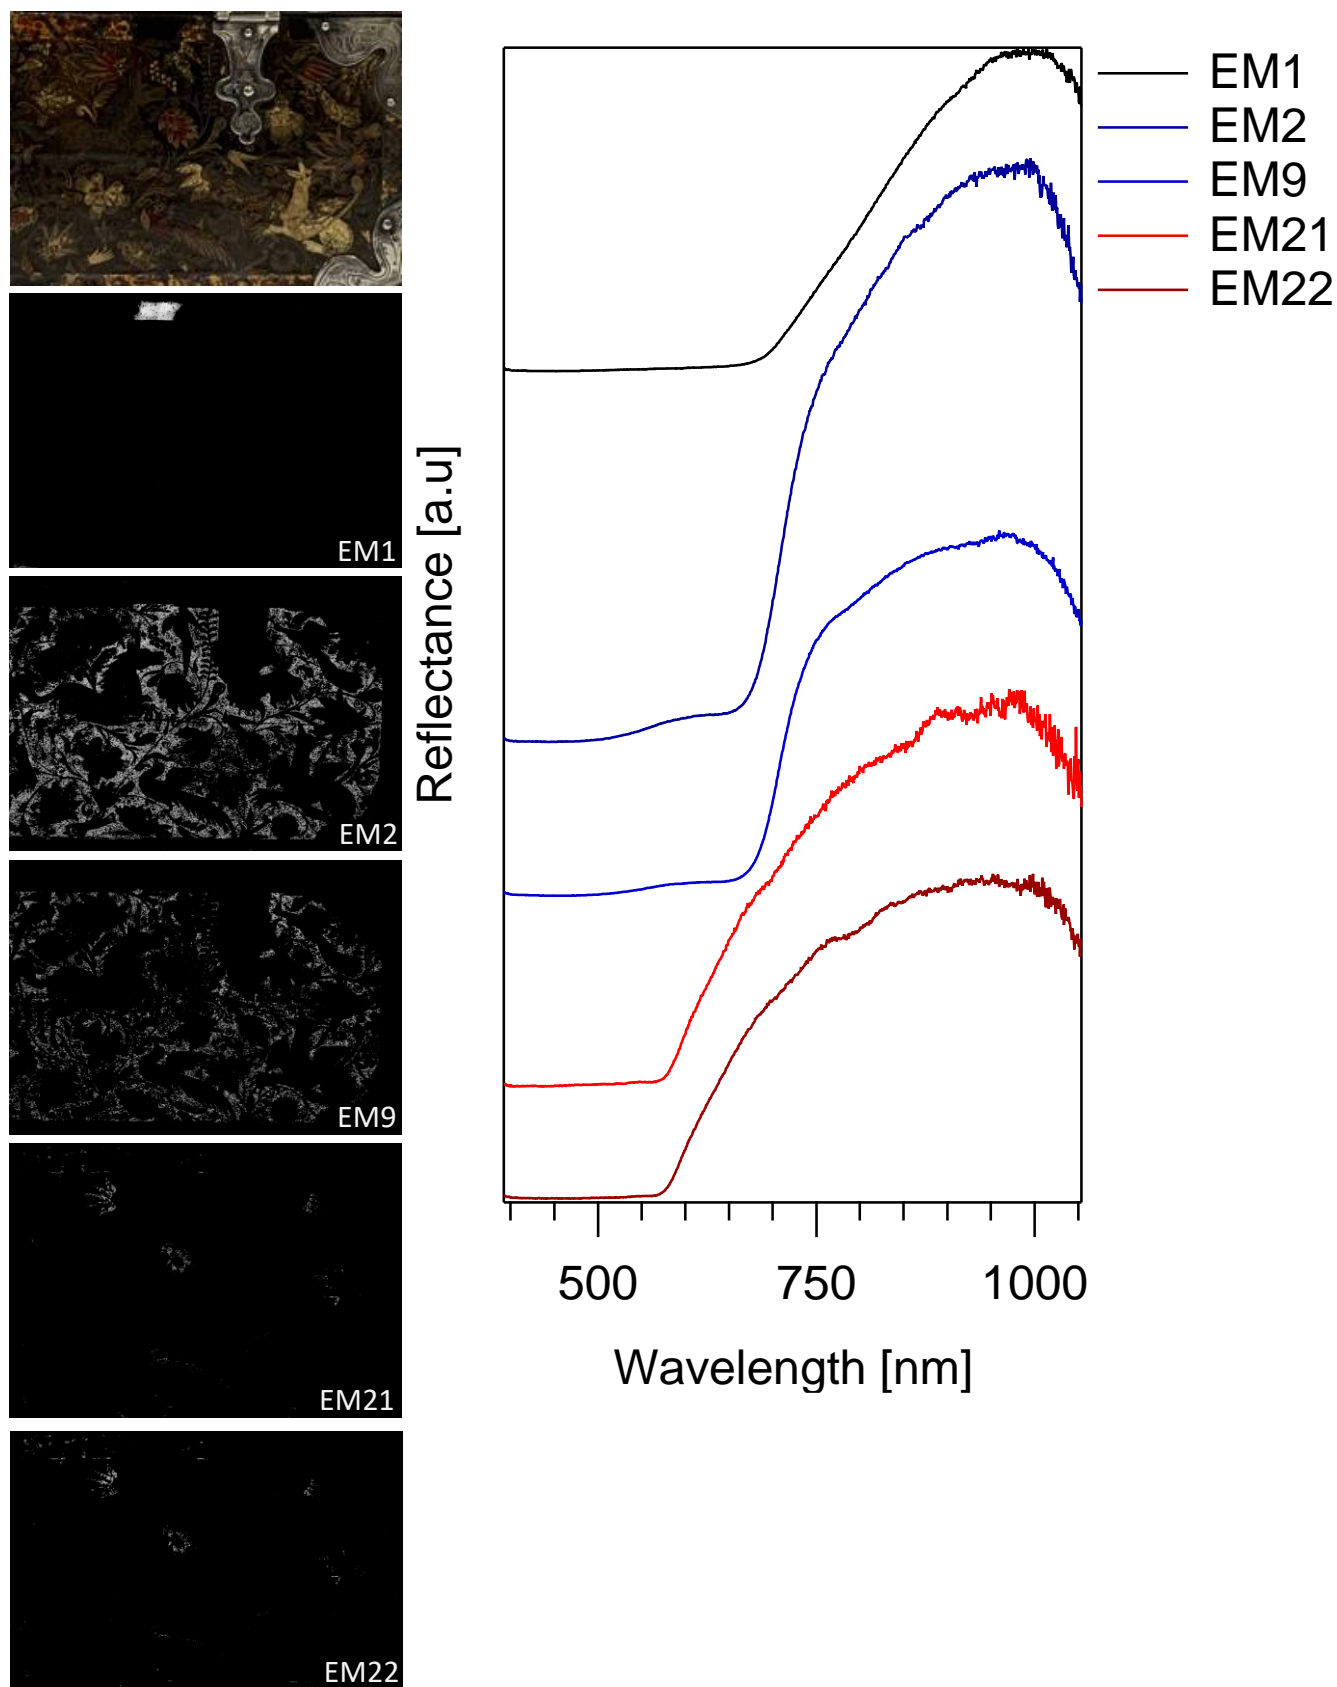

**Figure S1. (Left, top to bottom)** Visible area surveyed by RIS imaging (top left) and a subset of corresponding endmember (EM) rule images (distribution maps) . **(Right)** Subset of RIS endmember spectra for *Casket* LS2067 back panel. Offset for clarity.

**Table S3.** Subset of reflectance imaging data for *Casket* LS2067 front panel.<sup>†</sup>

| EM | Absorption<br>Features [nm] | Inflection Point(s)<br>[nm] | Assignment       | Apparent<br>Color |
|----|-----------------------------|-----------------------------|------------------|-------------------|
| 1  |                             |                             | Indigo?          | Black             |
| 2  | 452                         | 713                         | Indigo + Yellow? | Black?            |
| 9  | 460                         | 712                         | Indigo + Yellow? | Black?            |
| 21 |                             | 615                         |                  | Red               |
| 22 |                             | 610                         |                  | Red               |

<sup>†</sup>Only the most informative endmember are presented here. Endmembers corresponding to noise, edges, or other artifacts are discarded.

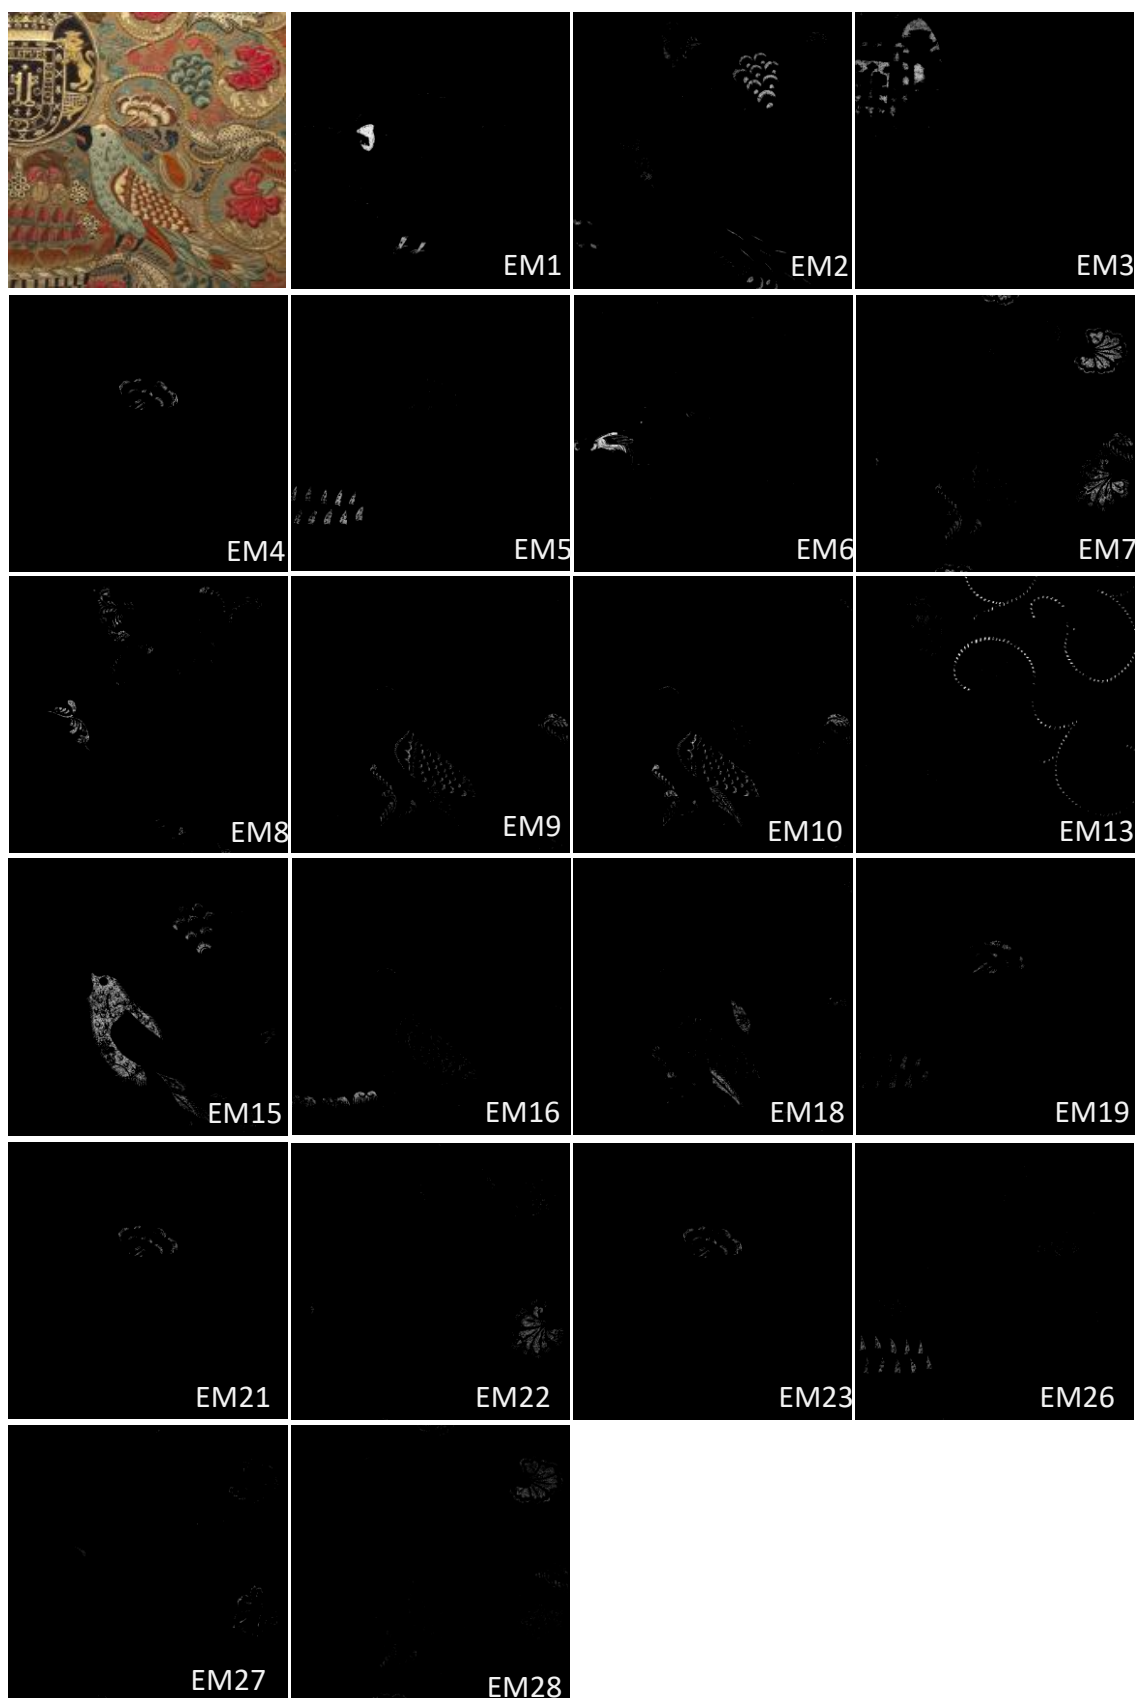

**Figure S2.** Subset of endmember (EM) rule images (distribution maps) for interior lid of *Escritorio LS2000*.

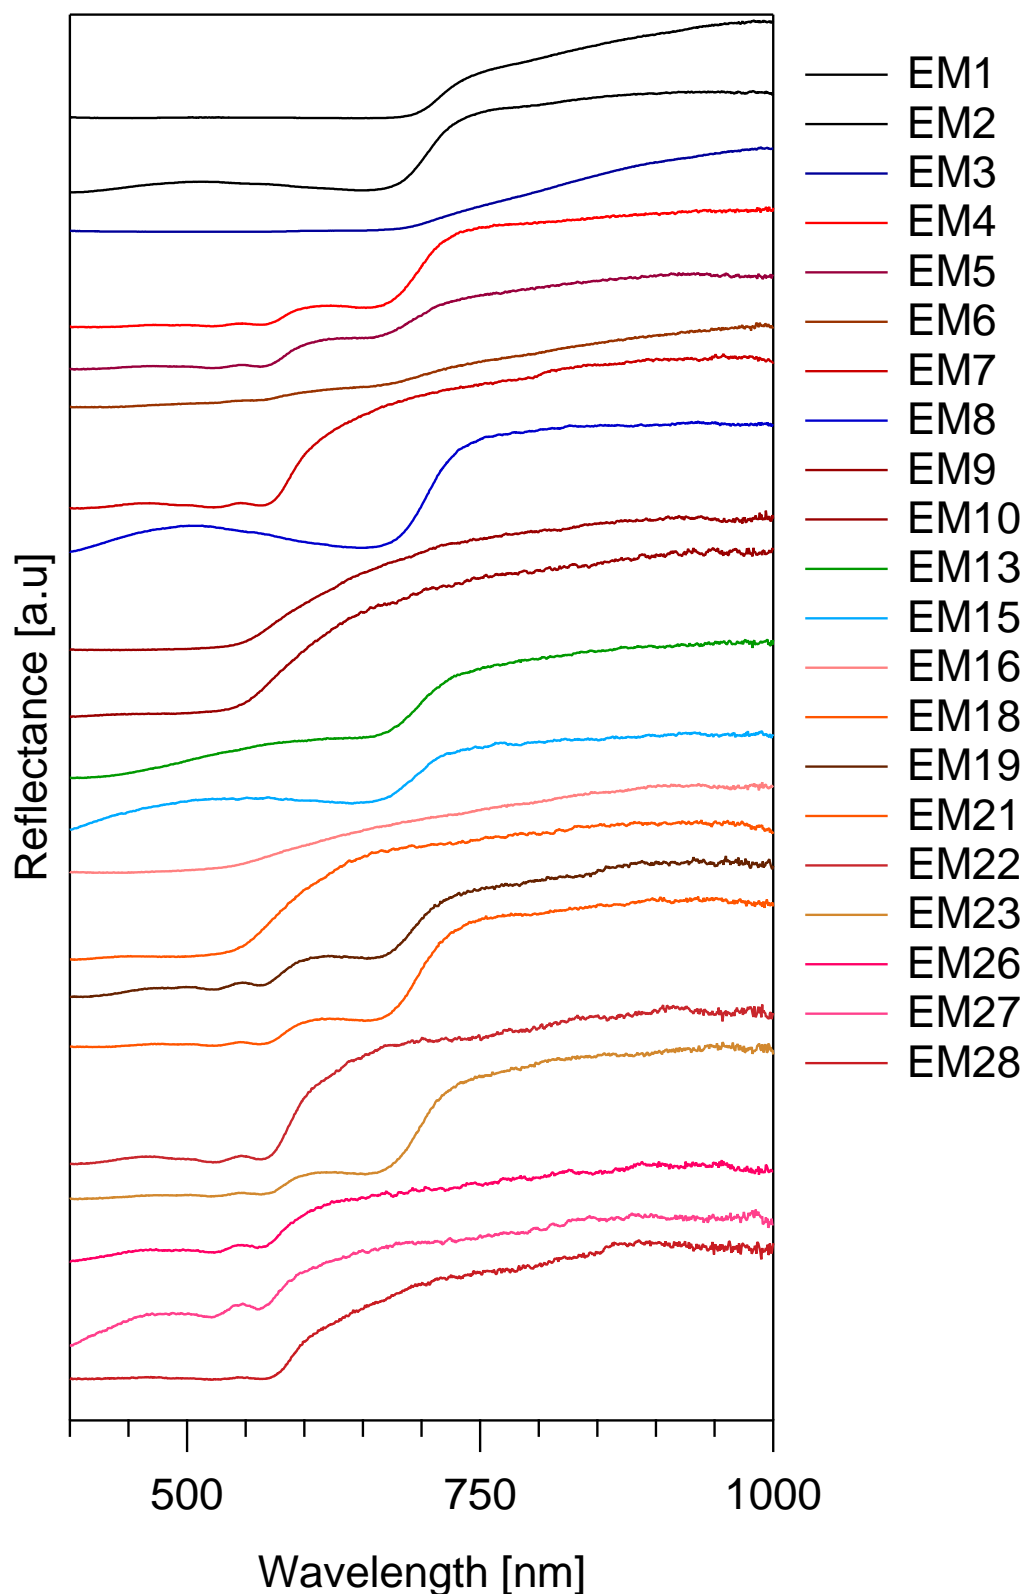

**Figure S3.** Subset of RIS endmember spectra for interior lid of *Escritorio* LS2000. Offset for clarity.

**Table S4.** Subset of reflectance imaging data for interior lid of *Escritorio* LS2000.<sup>†</sup>

| EM | Absorption<br>Features [nm] | Inflection<br>Point(s) [nm] | Assignment              | Apparent<br>Color |
|----|-----------------------------|-----------------------------|-------------------------|-------------------|
| 1  |                             | 719                         | Indigo                  | Black             |
| 2  | 649                         | 706                         | Indigo                  | Dark Blue         |
| 3  |                             | 709                         | Indigo                  | Black             |
| 4  | 521, 560, 655               | 583, 698                    | Indigo + Cochineal?     | Maroon            |
| 5  | 523, 562, 654               | 586                         | Indigo + Cochineal      | Pink              |
| 6  | 522, 560                    |                             | Cochineal + ?           | Brown             |
| 7  | 522, 562                    | 590                         | Cochineal               | Red               |
| 8  | 648                         | 706                         | Indigo                  | Blue              |
| 9  |                             | 590                         |                         | Red               |
| 10 |                             | 588                         |                         | Red               |
| 13 | 408                         | 699                         | Indigo + Yellow         | Green             |
| 15 | 642                         | 695                         |                         | Light Blue        |
| 16 | 436                         |                             |                         | Orange            |
| 18 | 401                         | 575                         | Unknown red +<br>yellow | Orange            |
| 19 | 523, 560, 656               |                             | Indigo + Cochineal      |                   |
| 21 | 519, 561, 651               | 699                         | Indigo + Cochineal      | Maroon            |
| 22 | 522, 564                    | 589                         |                         | Red               |
| 23 | 520, 564, 652               | 699                         |                         | Maroon            |
| 26 | 523, 560                    |                             | Cochineal               | Dark Pink         |
| 27 | 519, 559                    |                             | Cochineal               | Light Pink        |
| 28 | 521, 564                    | 595                         | Cochineal               | Red               |

<sup>†</sup>Only the most informative endmember are presented here. Endmembers corresponding to noise, edges, or other artifacts are discarded.



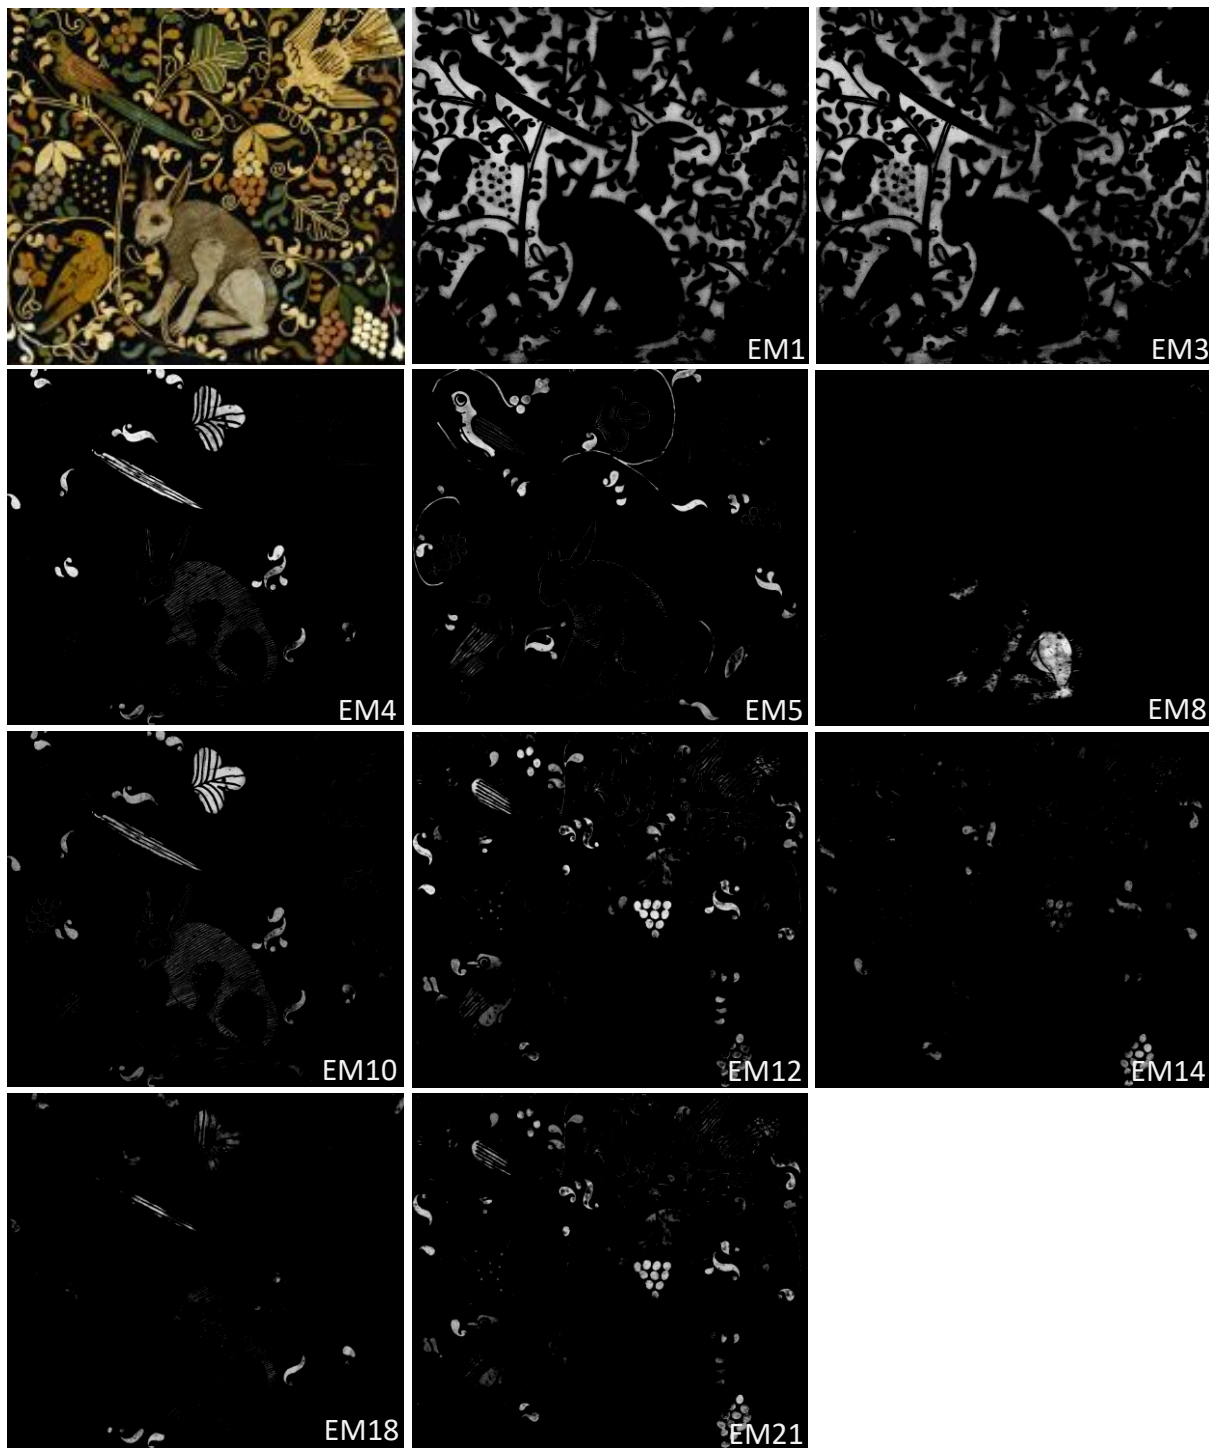

**Figure S4.** Visible area surveyed by RIS imaging (top left) and a subset of corresponding RIS endmember (EM) rule images (distribution maps) for side panel of *Casket* LS2361 with hare illustration.

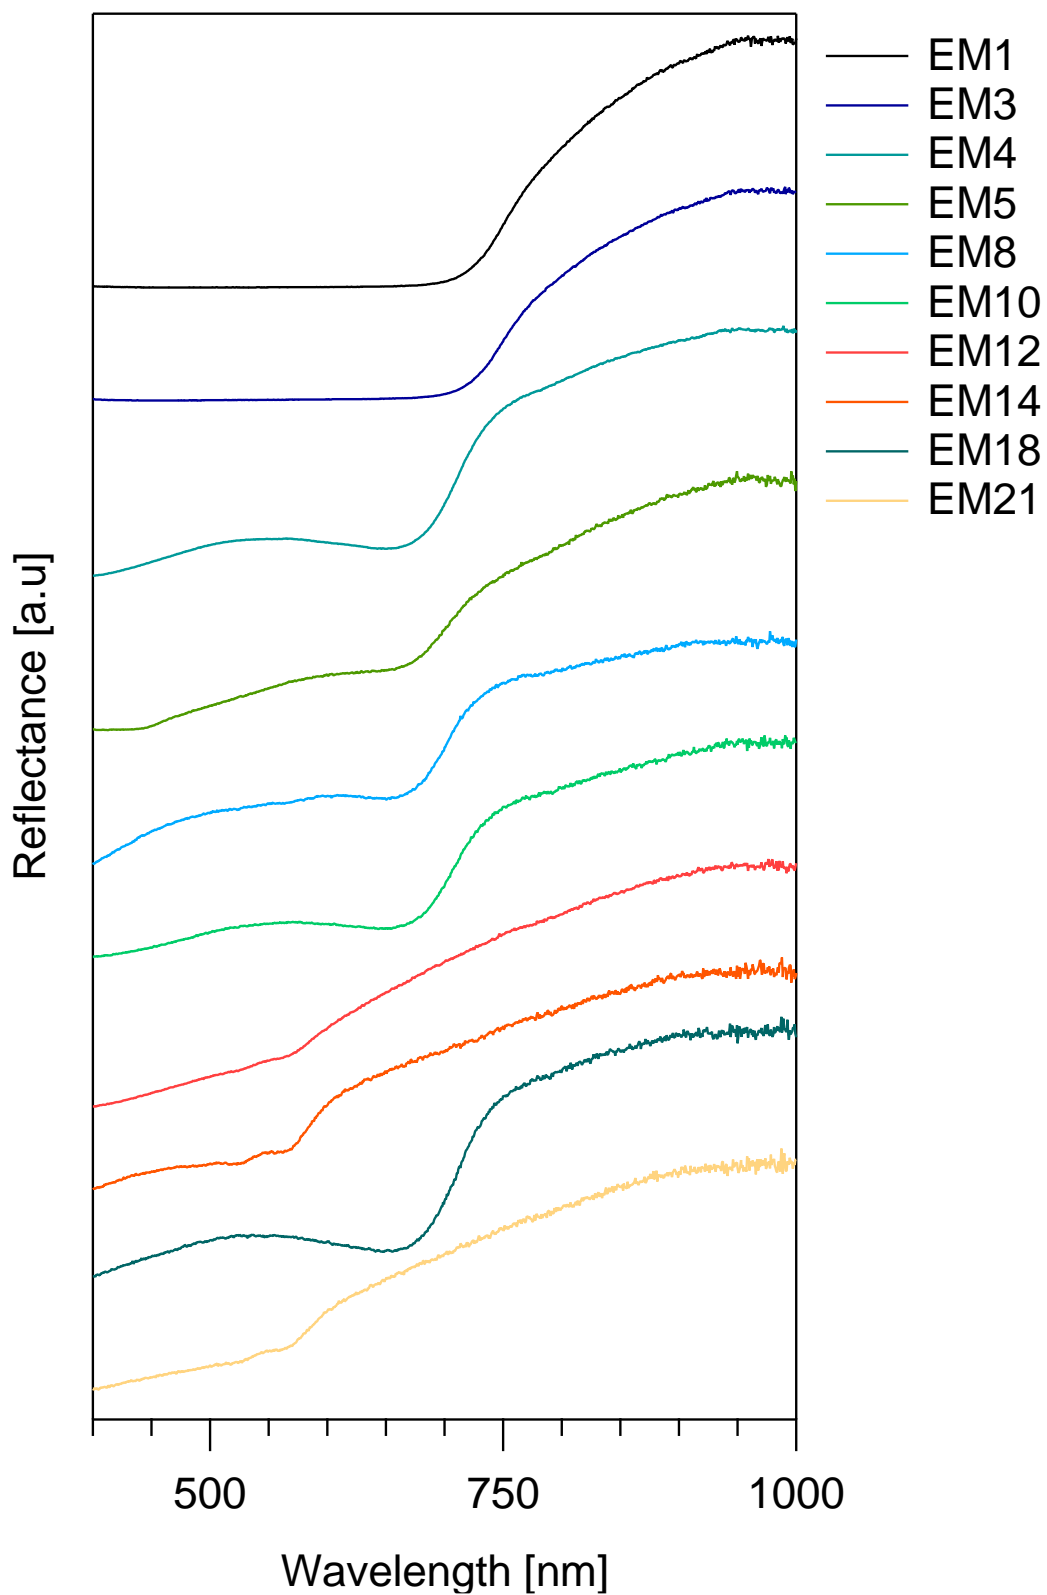

**Figure S5.** Subset of RIS endmember spectra for *Casket* LS2361 side panel with hare. Offset for clarity.

**Table S5.** Subset of reflectance imaging data for the *Casket* LS2361 side panel with hare.<sup>†</sup>

| EM | Absorption<br>Features [nm] | Inflection Point(s)<br>[nm] | Assignment       | Apparent<br>Color       |
|----|-----------------------------|-----------------------------|------------------|-------------------------|
| 1  |                             | 759                         | Indigo           | Black                   |
| 3  |                             | 757                         | Indigo           | Black                   |
| 4  | 649                         | 713                         | Indigo?          | Blue green<br>Dk. Olive |
| 5  | 412, 645                    | 704                         | Indigo + Yellow? | Green                   |
| 8  | 651                         | 703                         | Indigo           | Powder Blue             |
| 10 | 652                         | 709                         | Indigo + Yellow? | Blue green              |
| 12 | 524, 560                    |                             | Cochineal        | Peachy pink             |
| 14 | 523, 555                    | 586                         | Cochineal        | Peachy Pink             |
| 18 |                             | 712                         | Indigo + Yellow? | Blue Green              |
| 21 | 524, 552                    |                             | Cochineal        | Peachy Pink             |

<sup>†</sup>Only the most informative endmember are presented here. Endmembers corresponding to noise, edges, or other artifacts are discarded.

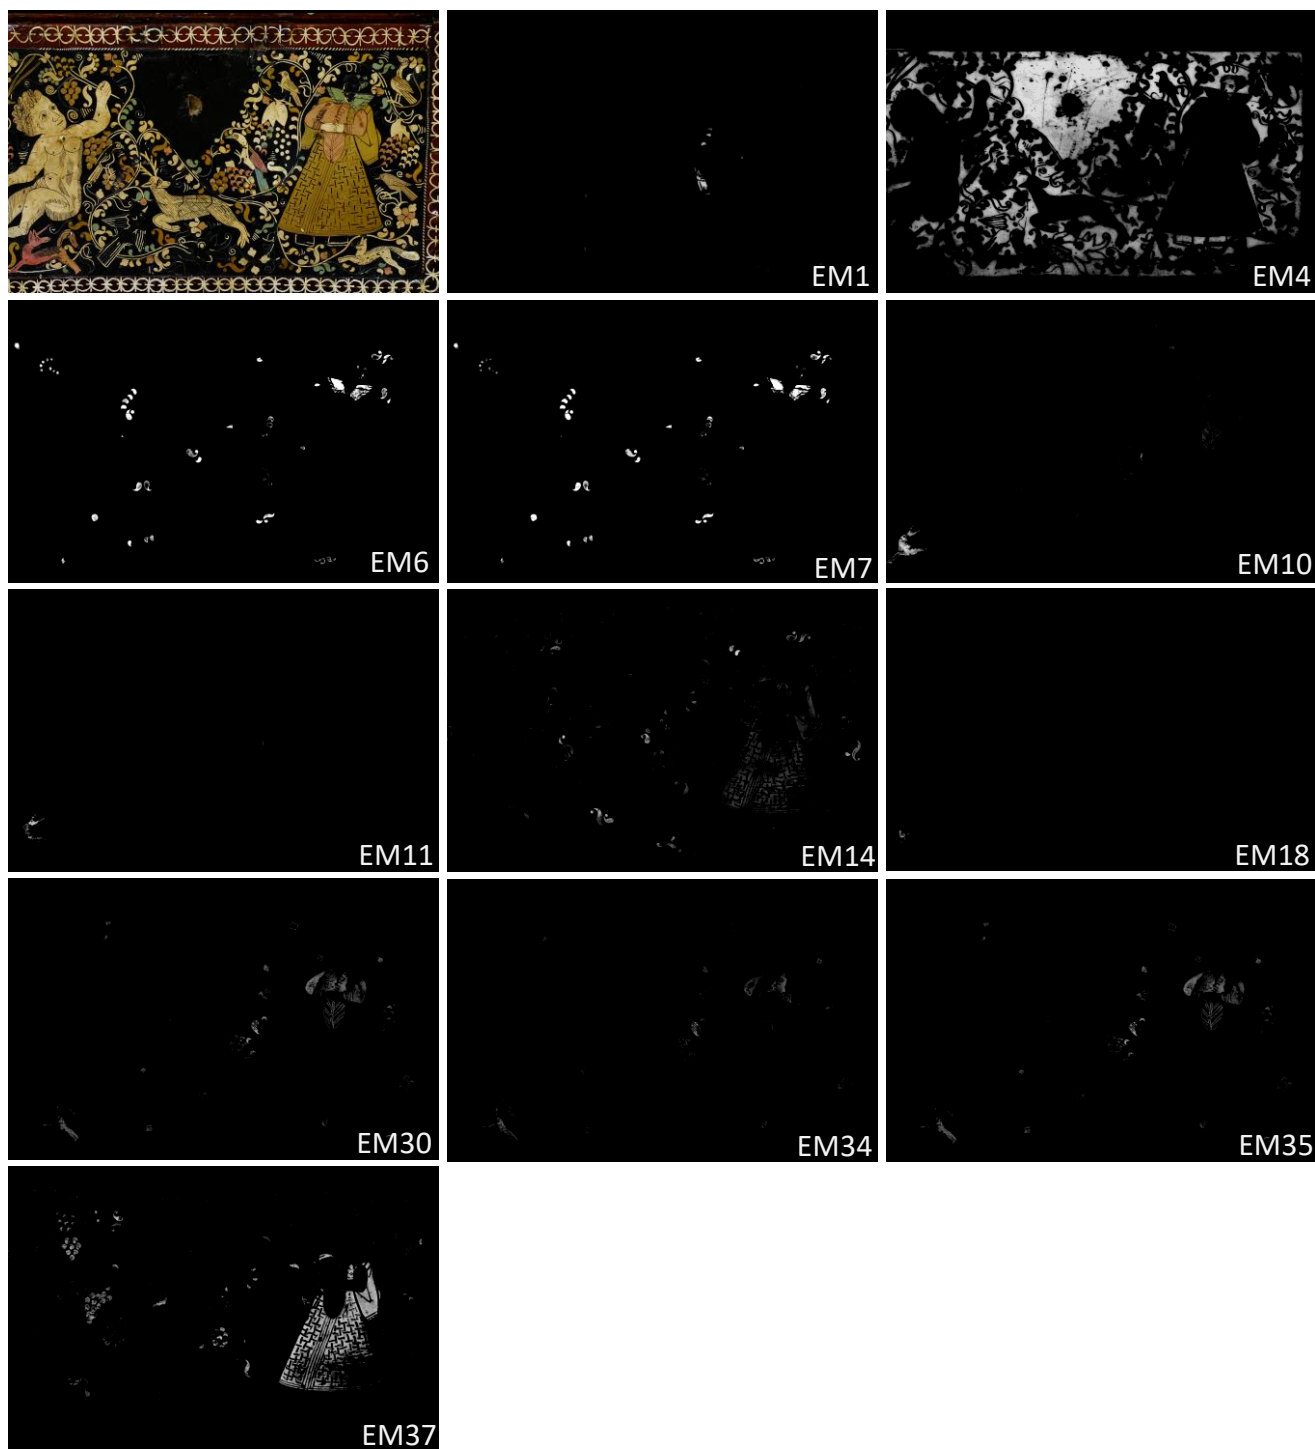

**Figure S6.** Visible area surveyed by RIS imaging (top left) and a subset of corresponding endmember (EM) rule images (distribution maps) for front panel of *Casket* LS2361.

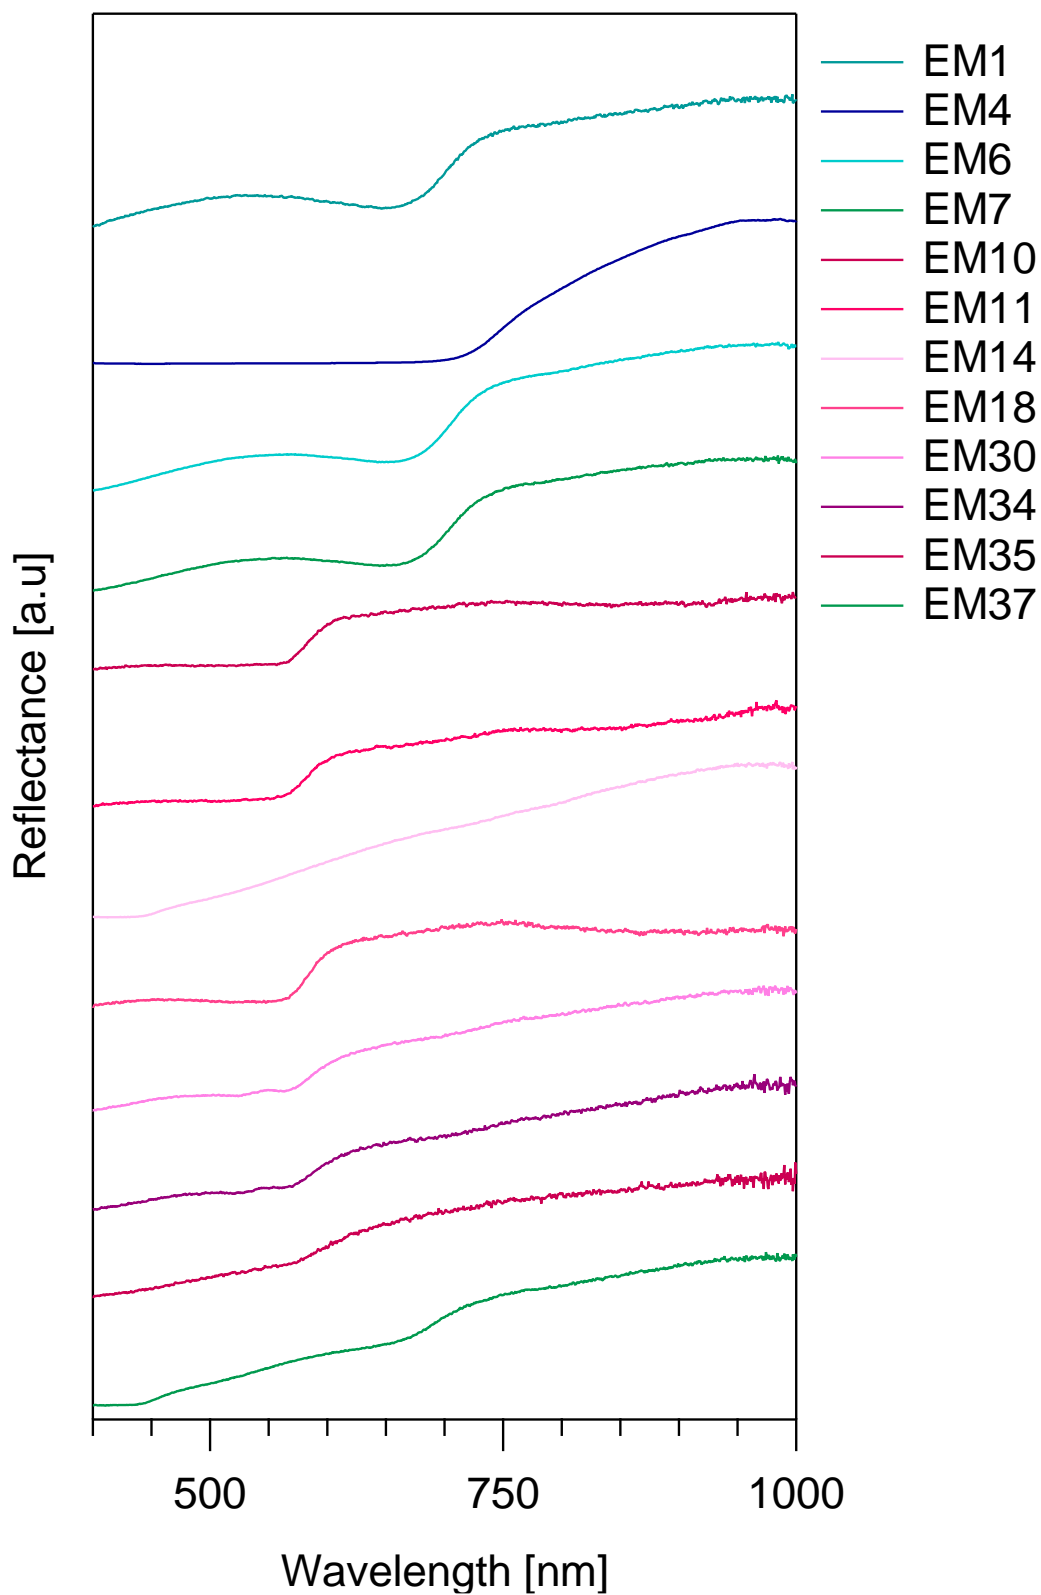

**Figure S7.** Subset of RIS endmember spectra for front panel of *Casket* LS2361. Offset for clarity.

**Table S6.** Subset of reflectance imaging data for the *Casket* LS2361 front panel.<sup>†</sup>

| EM | Absorption<br>Features [nm] | Inflection Point(s)<br>[nm] | Assignment       | Apparent<br>Color |
|----|-----------------------------|-----------------------------|------------------|-------------------|
| 1  | 647                         | 704                         | Indigo + Yellow? | Blue              |
| 4  |                             | 745                         | Indigo           | Black             |
| 6  | 649                         | 705                         | Indigo + Yellow? | Blue green        |
| 7  | 645                         | 707                         | Indigo + Yellow? | Blue green        |
| 10 |                             | 585                         |                  | Hot Pink          |
| 11 |                             | 583                         |                  | Hot Pink          |
| 14 | 427                         |                             |                  |                   |
| 15 | 653                         | 707                         |                  |                   |
| 18 |                             | 585                         |                  | Hot Pink          |
| 30 | 524, 564                    |                             | Cochineal?       | Peachy Pink       |
| 34 | 520, 562                    |                             | Cochineal        | Peachy Pink       |
| 35 |                             |                             |                  | Peachy Pink       |
| 37 | 421                         | 693                         |                  | Olive Green       |

<sup>†</sup>Only the most informative endmember are presented here. Endmembers corresponding to noise, edges, or other artifacts are discarded.

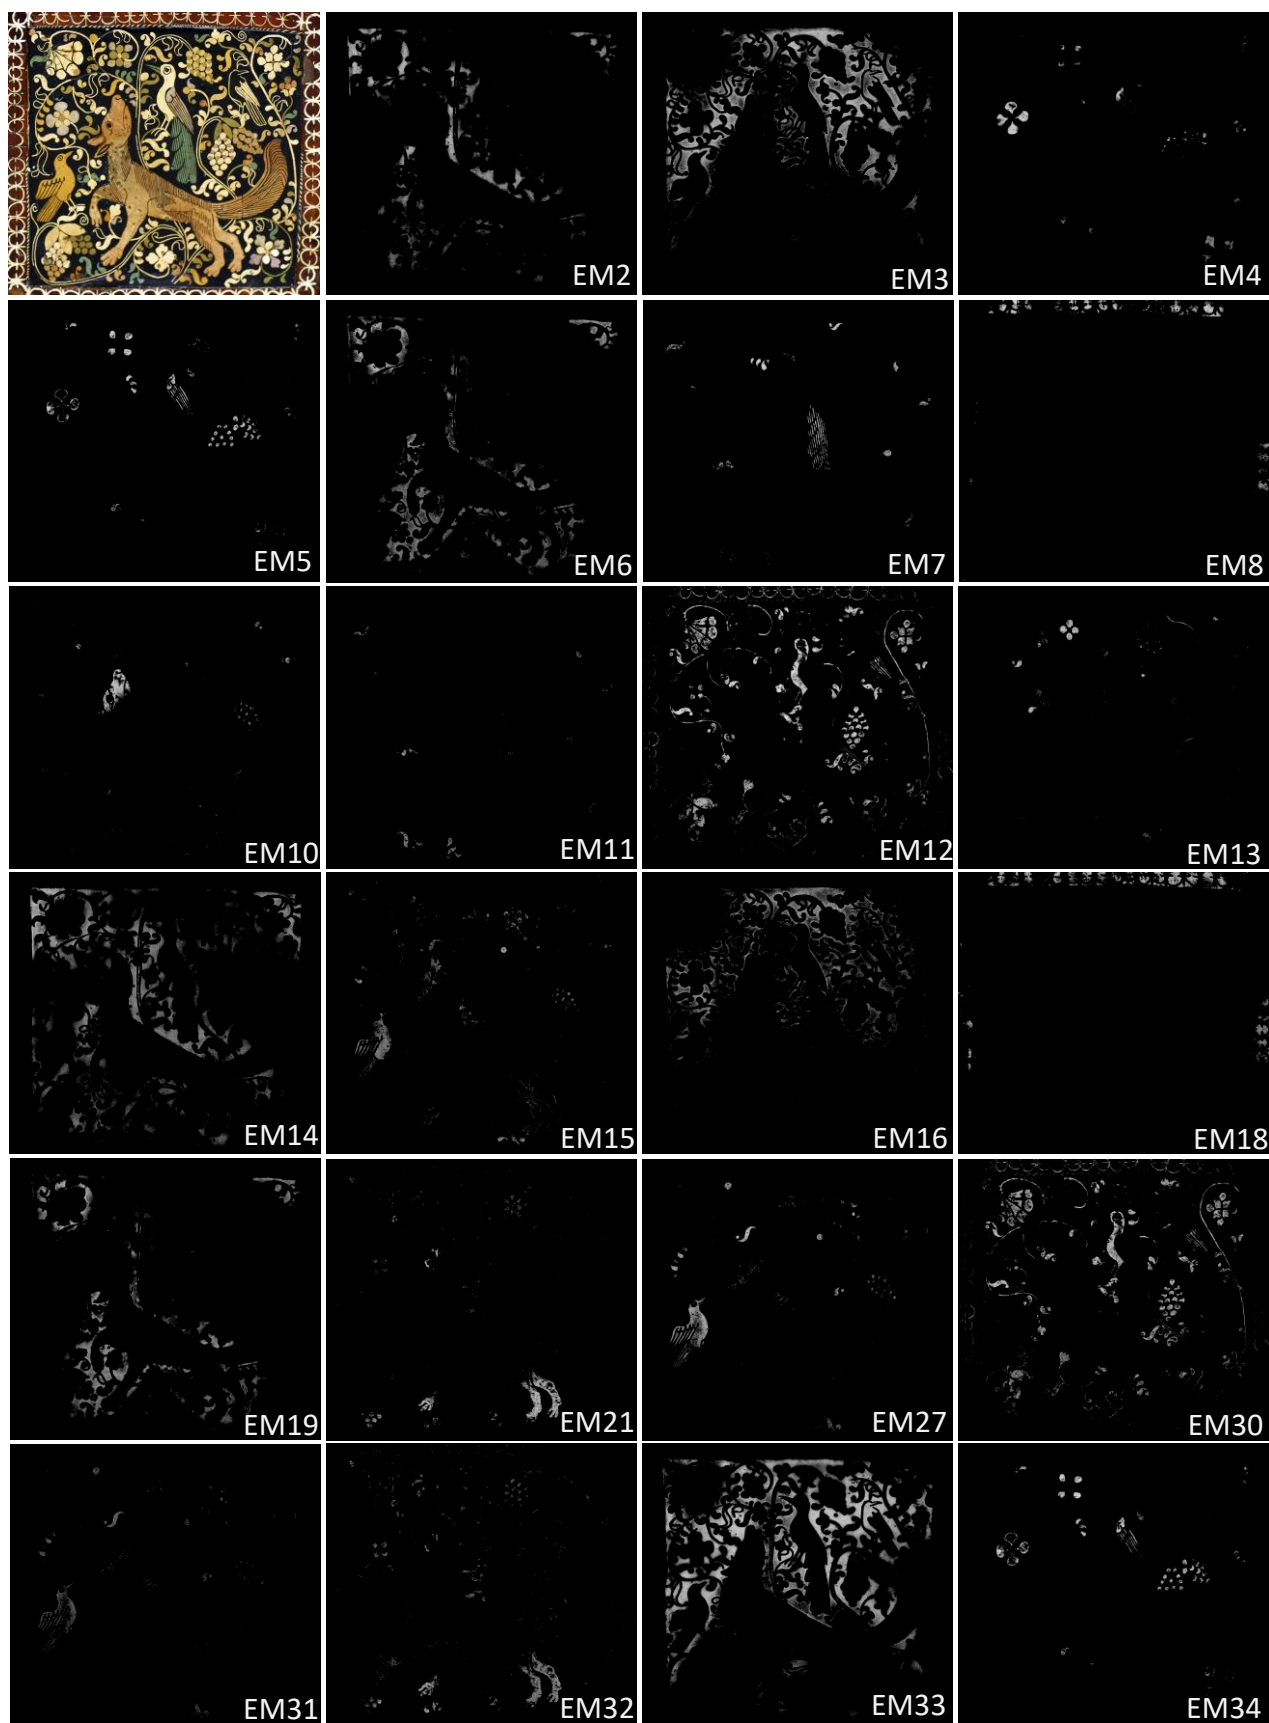

**Figure S8.** Visible image of area surveyed by RIS imaging (top left) and a subset of corresponding endmember (EM) rule images (distribution maps) for side panel of *Casket* LS2361 with illustration of the wolf.

**Table S7.** Subset of reflectance imaging data for the *Casket* LS2361 side panel with wolf.<sup>†</sup>

| EM | Absorption<br>Features [nm] | Inflection Point(s)<br>[nm] | Assignment          | Apparent<br>Color |
|----|-----------------------------|-----------------------------|---------------------|-------------------|
| 2  |                             | 747                         | Indigo              | Black             |
| 3  |                             | 753                         | Indigo              | Black             |
| 4  | 561, 645                    | 705                         | Indigo + Cochineal? | Purple Blue       |
| 5  | 518, 560, 644               | 706                         | Indigo + Cochineal  | Purple Blue       |
| 6  |                             | 749                         | Indigo              | Black             |
| 7  | 400, 653                    | 713                         | Indigo + Yellow     | Blue Green        |
| 8  | 470                         |                             |                     | Red               |
| 9  | 560                         |                             | Cochineal?          | Peach Pink        |
| 11 | 398, 653                    | 711                         | Indigo + Yellow     | Blue Green        |
| 12 | 395                         |                             |                     | Off-White         |
| 13 | 413, 643                    | 695                         | Indigo + Yellow     | Green             |
| 14 |                             | 751                         | Indigo              | Black             |
| 15 | 416                         |                             | Yellow?             | Orange            |
| 16 |                             | 747                         | Indigo              | Black             |
| 18 | 483                         |                             |                     | Red               |
| 19 |                             | 748                         | Indigo              | Black             |
| 21 | 564?                        |                             | Yellow + Cochineal? | Peach Pink        |
| 27 | 416                         |                             |                     | Orange            |
| 30 |                             |                             |                     | Off White         |
| 31 | 415                         |                             |                     | Orange            |
| 32 | 393, 566                    |                             | Yellow + Cochineal? | Peach Pink        |
| 33 |                             | 745                         | Indigo              | Black             |
| 34 | 521, 562, 640               | 706                         | Indigo + Cochineal  | Purple Blue       |

<sup>†</sup>Only the most informative endmember are presented here. Endmembers corresponding to noise, edges, or other artifacts are discarded.



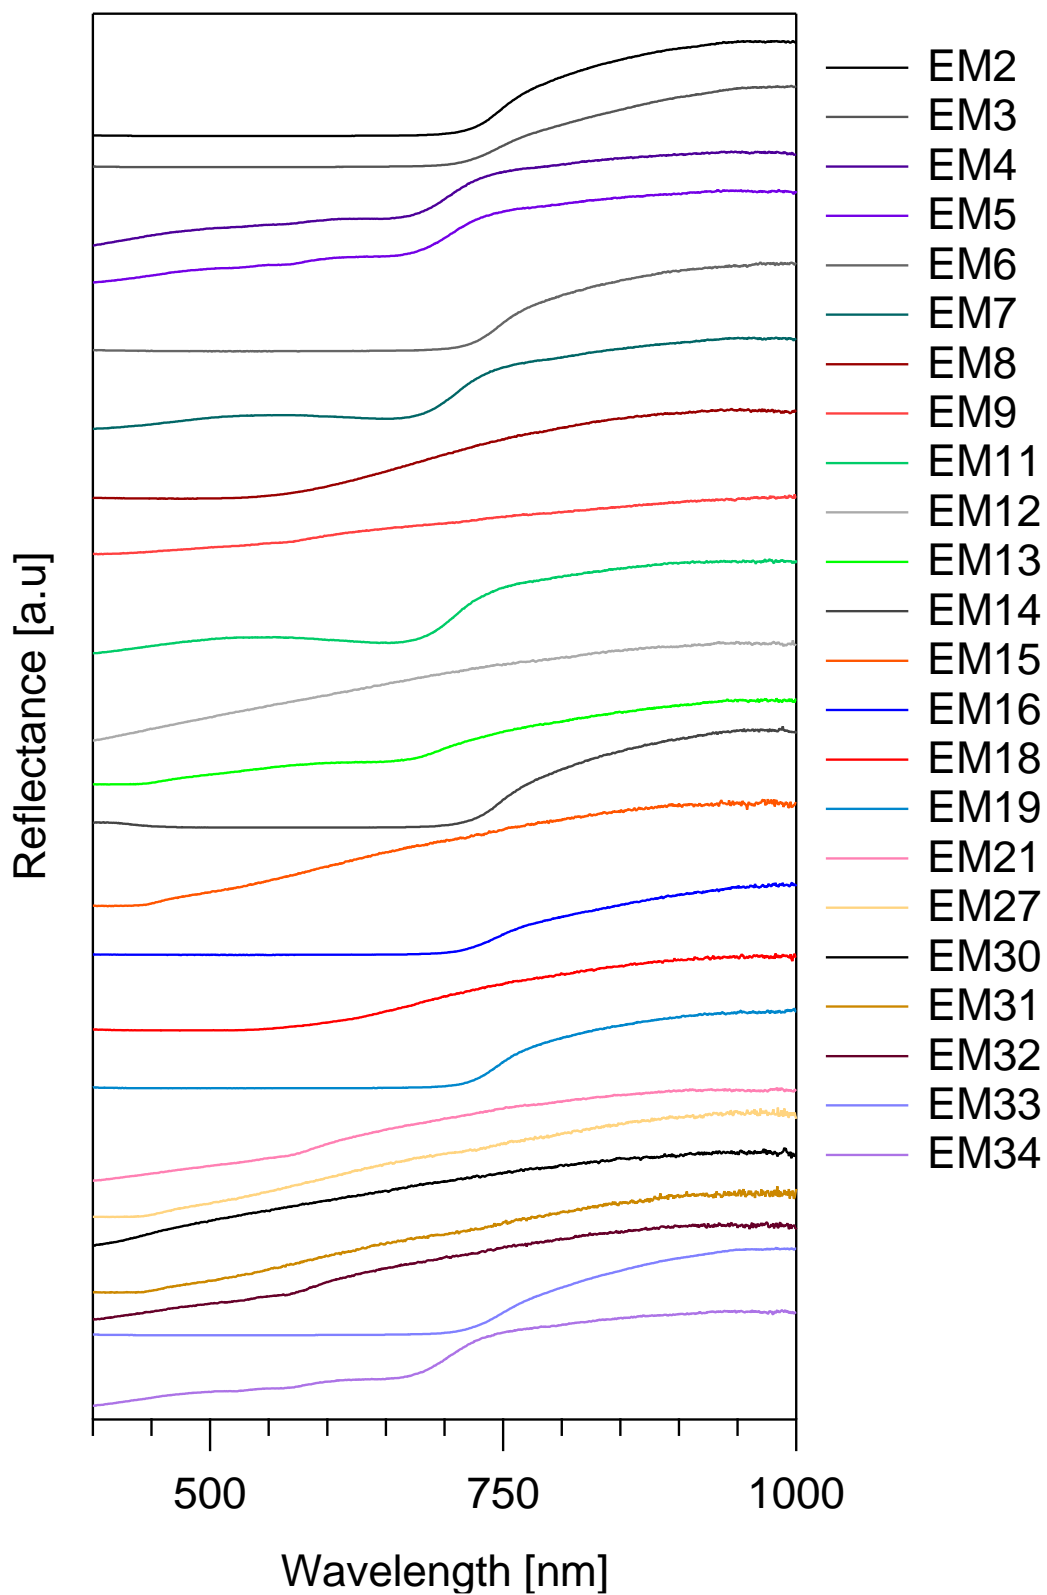

**Figure S9.** Subset of RIS endmember spectra for *Escritorio* LS2446 side panel with wolf. Offset for clarity.

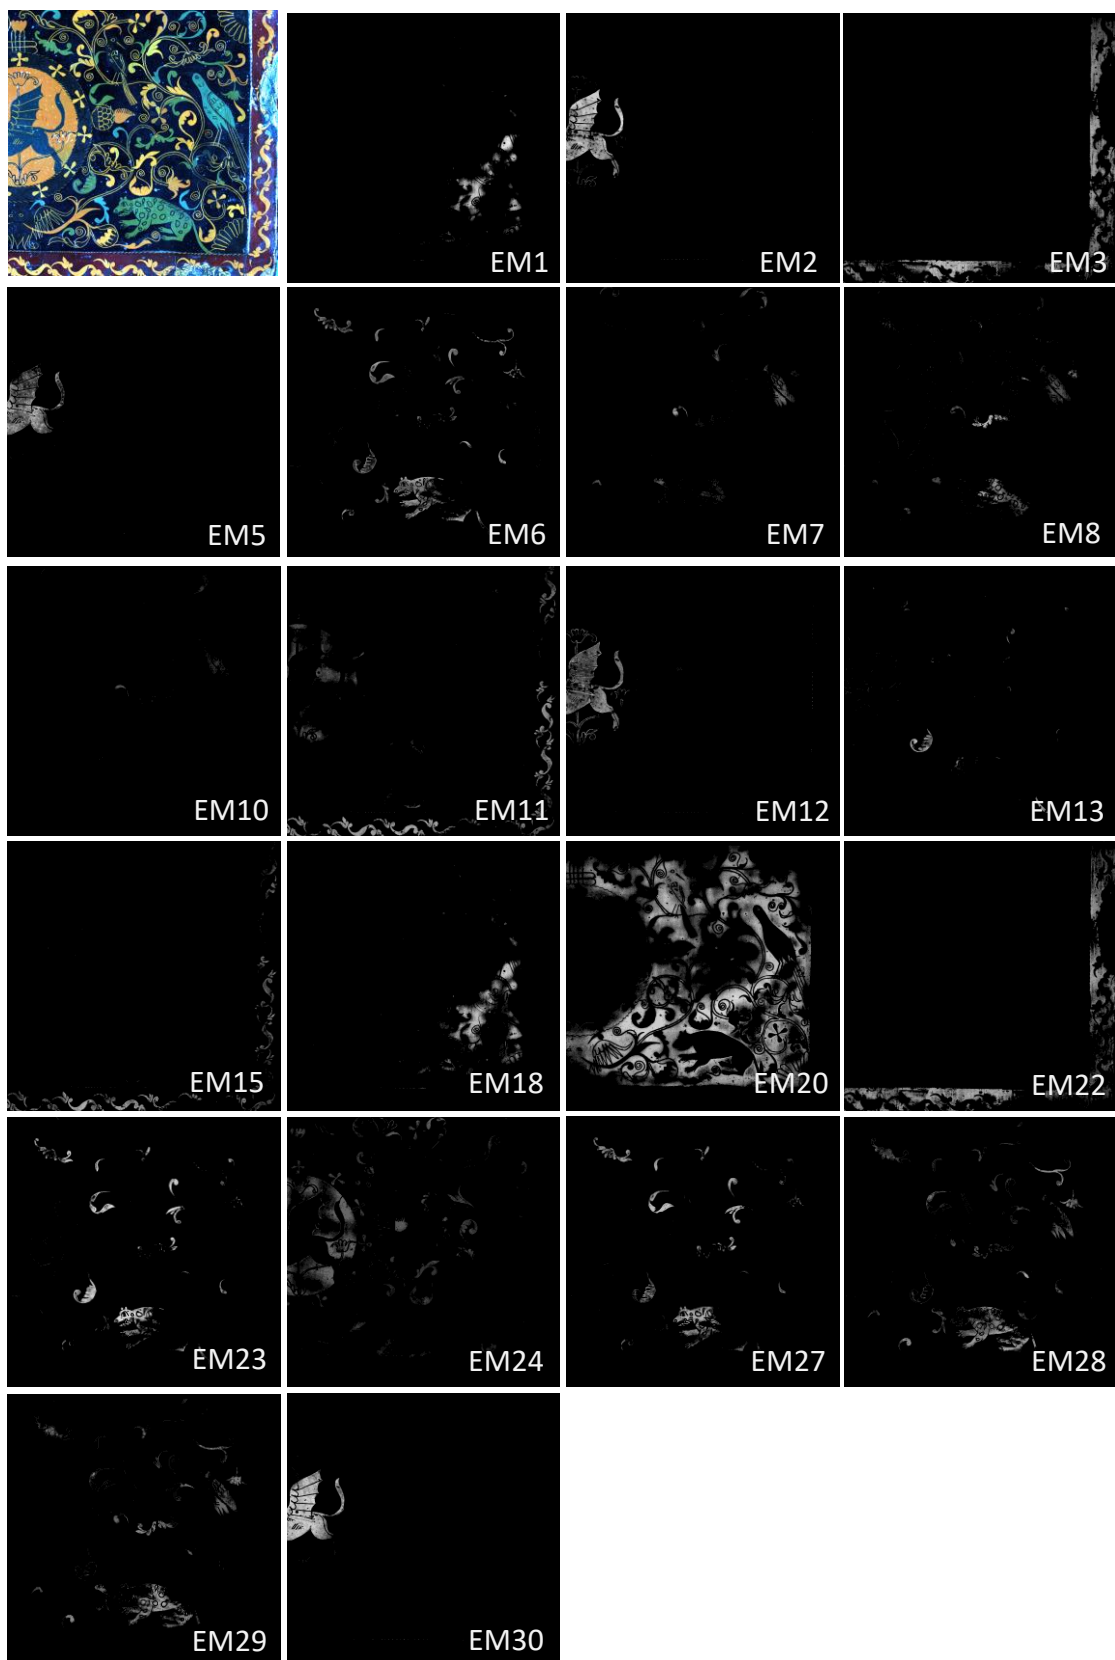

**Figure S10.** True-color composite image of area surveyed by RIS imaging (top left) and a subset of corresponding RIS endmember (EM) rule images (distribution maps) for exterior side panel of *Escritorio* LS2446 with illustration of griffin.

**Table S8.** Subset of reflectance imaging data for side panel of *Escritorio* LS2446 side panel.<sup>†</sup>

| EM | Absorption<br>Features [nm] | Inflection<br>Point(s) [nm] | Assignment      | Apparent<br>Color |
|----|-----------------------------|-----------------------------|-----------------|-------------------|
| 1  |                             | 755                         | Indigo?         | Black             |
| 2  | 644                         | 734                         | Indigo          | Dark Blue         |
| 3  | 517                         |                             |                 | Red               |
| 5  | 635                         | 725                         | Indigo          | Dark Blue         |
| 6  | 412, 635                    | 714                         | Indigo + Yellow | Blue Green        |
| 7  | 397                         | 719                         | Indigo + Yellow | Blue Green        |
| 8  | 414, 652                    |                             | Indigo + Yellow | Blue Green        |
| 10 | 406, 653                    | 719                         | Indigo + Yellow | Blue Green        |
| 11 | 409                         |                             |                 | Yellow/Orange     |
| 12 |                             | 736                         | Indigo          | Dark Blue         |
| 13 | 421, 653                    | 718                         | Indigo + Yellow | Blue Green        |
| 15 | 411                         |                             |                 | Yellow            |
| 18 |                             | 752                         |                 | Black             |
| 21 |                             | 746                         | Indigo          | Black             |
| 22 |                             |                             |                 | Red               |
| 23 | 407                         | 714                         | Indigo + Yellow | Blue Green        |
| 24 | 425                         |                             |                 | Yellow/Orange     |
| 27 | 411, 645                    | 712                         | Indigo + Yellow | Blue Green        |
| 28 | 406, 645                    | 712                         | Indigo + Yellow | Blue Green        |
| 29 | 412, 642                    | 711                         | Indigo + Yellow | Blue Green        |
| 30 | 631                         | 729                         | Indigo          | Dark Blue         |

<sup>†</sup>Only the most informative endmember are presented here. Endmembers corresponding to noise, edges, or other artifacts are discarded.

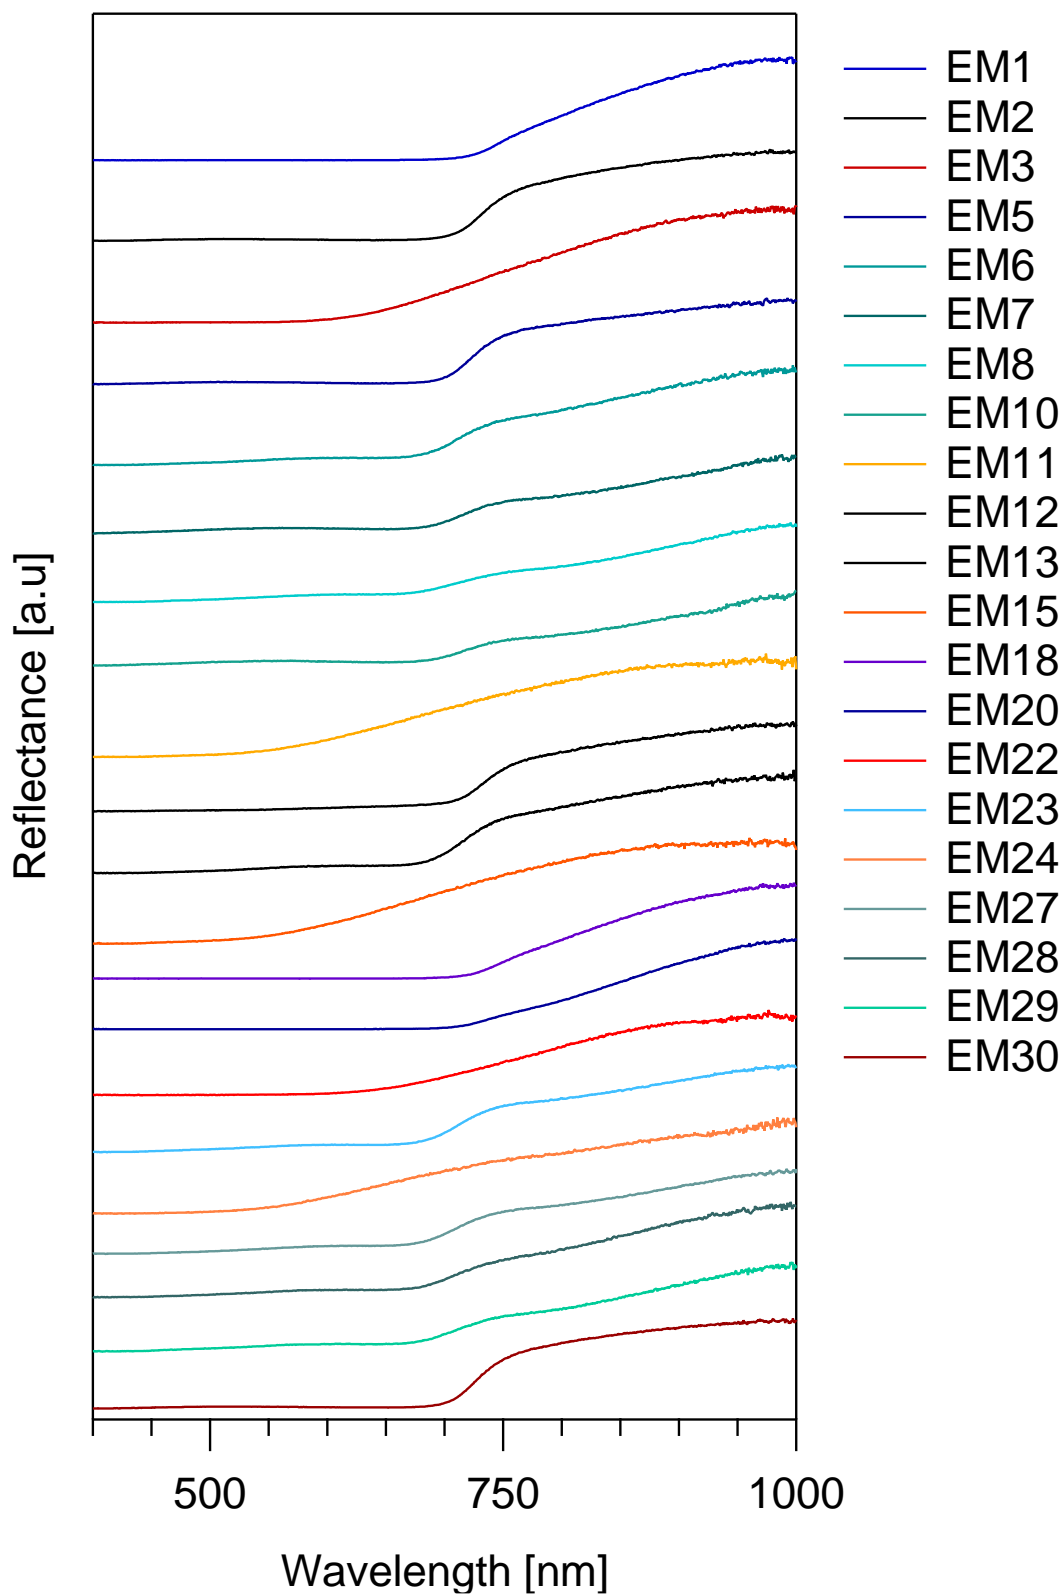

**Figure S11.** Subset of RIS endmember spectra for side panel of *Escritorio* LS2446. Offset for clarity.

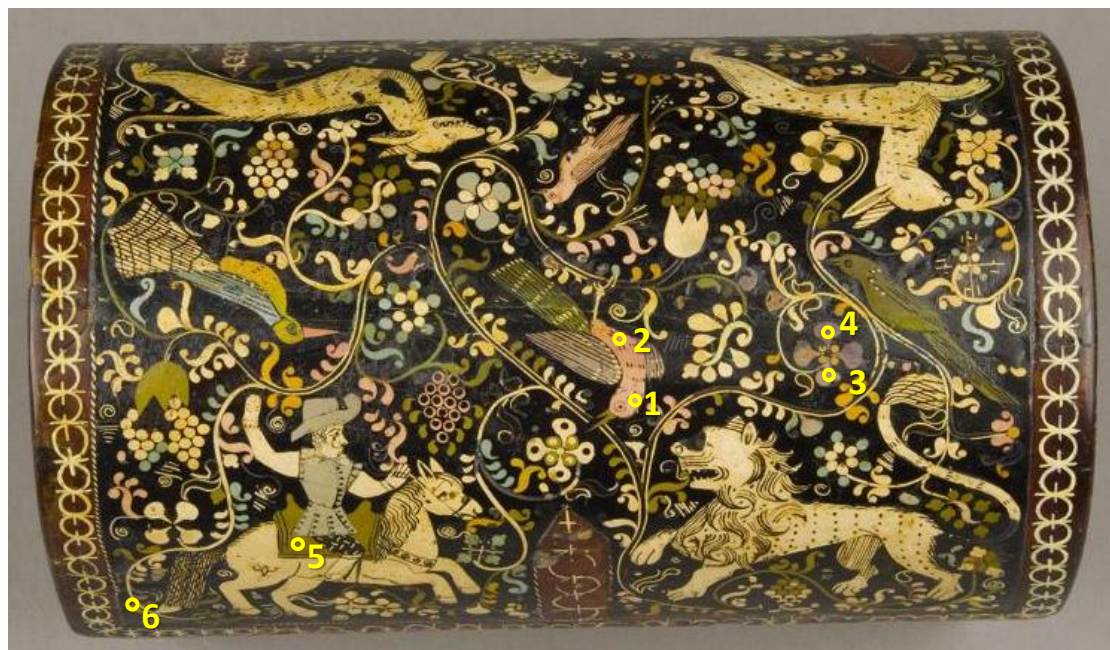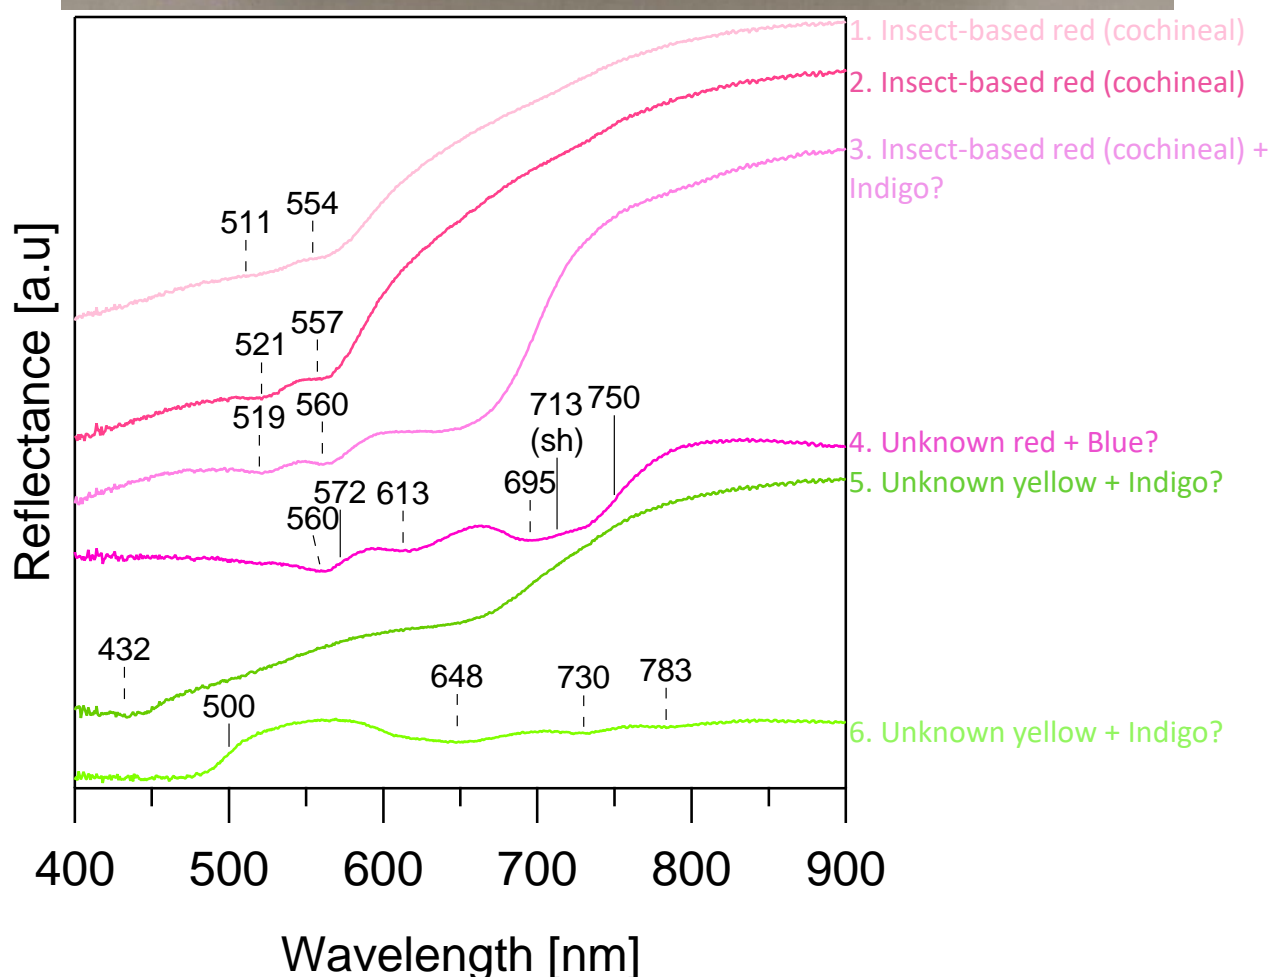

**Figure S12. (Top)** Top-down view of lid of *Casket* LS2361 with approximate locations of FORS analyses indicated by open circles and annotated with position number. **(Bottom)** FORS spectra collected from lid of *Casket* LS2361 with corresponding location number and identification provided at right of plot. Inflection point are indicated by solid lines while apparent absorption features are indicated by dashed lines. Spectra are offset for clarity.

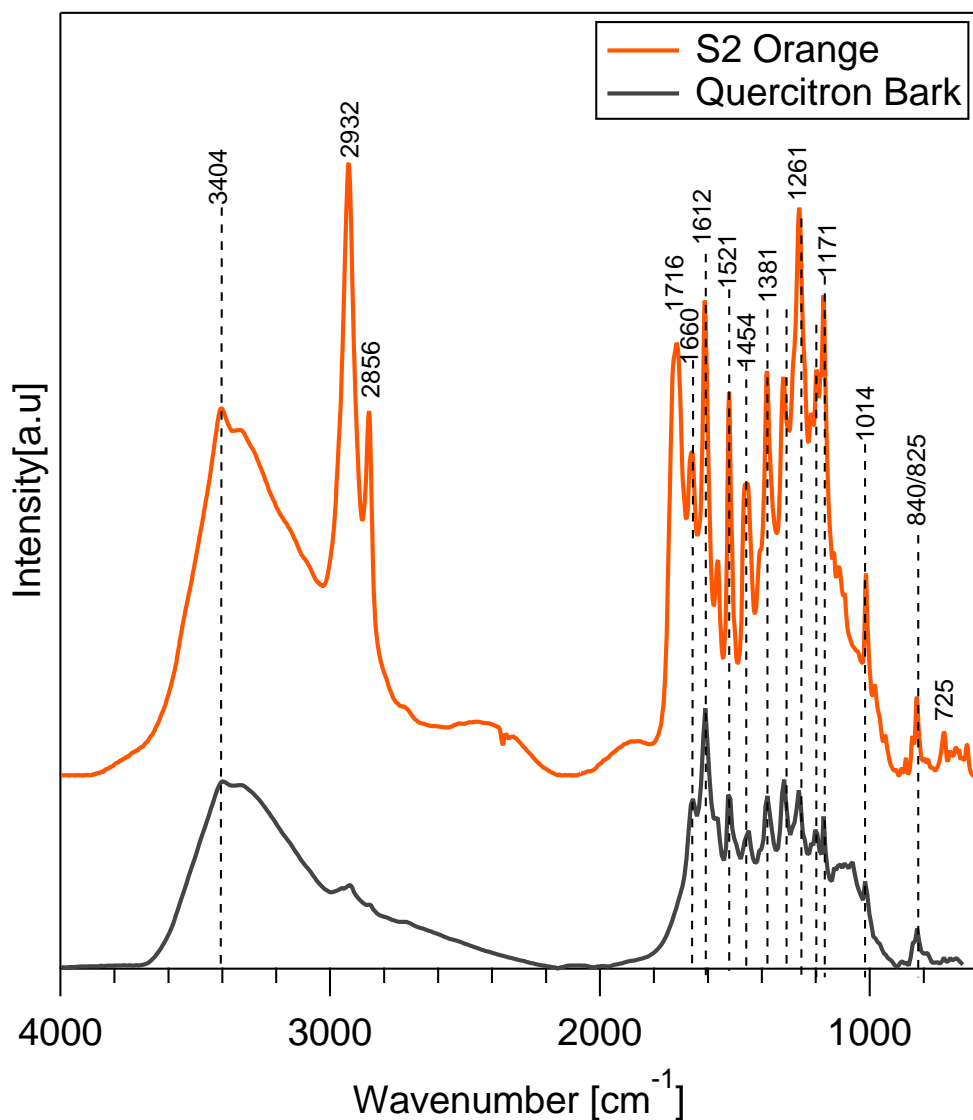

**Figure S13.** Comparison of FTIR spectra of sample S2 collected from an orange area on *Tabletop* LS2447 (orange spectrum, baseline-corrected) and library reference for quercitron bark (gray spectrum).

**Table S9.** Summary of compounds identified in LC/MS analysis of *E. scabrifolia* and comparison of compounds identified in *E. scabrifolia* root and samples collected from *Tabletop* LS2447.

| Compounds detected by LC-MS analysis of Escobedia Scabrifolia roots |                      |                         |                                                        |                                 | Presence in other samples         |                                               |                        |                        |                        |
|---------------------------------------------------------------------|----------------------|-------------------------|--------------------------------------------------------|---------------------------------|-----------------------------------|-----------------------------------------------|------------------------|------------------------|------------------------|
| m/z <sup>a</sup>                                                    | Retention Time [min] | UV-Vis Signals [nm]     | Molecular Formula <sup>b</sup>                         | Detected compound               | E.Scabrifolia MeOH <sup>c,d</sup> | E. Scabrifolia BF <sub>3</sub> <sup>c,e</sup> | LS2447 S2 <sup>e</sup> | LS2447_S3 <sup>d</sup> | LS2447_S5 <sup>d</sup> |
| 401.2682 (+)                                                        | 25.6                 | 195, 218, 416           | C <sub>25</sub> H37O4 (1.0)                            | Aeginetin                       | Yes                               | No                                            | No                     | No                     | No                     |
| 399.2541 (-)                                                        | 25.6                 | 195, 218, 416           | C <sub>25</sub> H <sub>35</sub> O4 (0.0)               | Aeginetin                       | Yes                               | No                                            | No                     | No                     | No                     |
| 425.2689 (-)                                                        | 26.6                 | 242, 417                | C <sub>27</sub> H37O4 (0.0)                            | Azafrin                         | Yes                               | No                                            | No                     | No                     | No                     |
| 427.2844 (+)                                                        | 26.5                 | 242, 417                | C <sub>27</sub> H <sub>39</sub> O4 (0.8)               | Azafrin                         | Yes                               | No                                            | No                     | No                     | No                     |
| 449.1098 (+)                                                        | 8.1                  | 191, 211                | C <sub>21</sub> H <sub>21</sub> O <sub>11</sub> (-4.5) | Unknown                         | No                                | Yes                                           | No                     | No                     | No                     |
| 447.0957 (-)                                                        | 8.0                  | 190, 207, 310           | C <sub>21</sub> H <sub>19</sub> O <sub>11</sub> (-4.8) | Flavonoid                       | No                                | Yes                                           | No                     | No                     | No                     |
| 449.2037 (-)                                                        | 7.0                  | 232                     | C <sub>20</sub> H <sub>33</sub> O <sub>11</sub> (-0.3) | Unknown                         | Yes                               | Yes                                           | No                     | No                     | No                     |
| 809.4158 (+)                                                        | 7.1                  | 232                     | C <sub>38</sub> H <sub>65</sub> O <sub>18</sub> (0.9)  | Unknown                         | Yes                               | Yes                                           | No                     | No                     | No                     |
| 611.2559 (-)                                                        | 8.2                  | N/A                     | C <sub>28</sub> H <sub>44</sub> O <sub>16</sub> (0.0)  | Unknown                         | Yes                               | Yes                                           | No                     | No                     | No                     |
| 387.2168(-)                                                         | 10.8                 | 190, 198, 238, 305, 425 | C <sub>19</sub> H <sub>33</sub> O <sub>8</sub> (0.2)   | Polyphenol                      | No                                | Yes                                           | No                     | No                     | No                     |
| 491.2498 (-)                                                        | 10.0                 | 190, 198, 238, 305, 425 | C <sub>23</sub> H <sub>39</sub> O <sub>11</sub> (0.1)  | Anthocyanin                     | Yes                               | Yes                                           | No                     | No                     | No                     |
| 381.2425 (+)                                                        | 17                   | 193, 216                | C <sub>25</sub> H <sub>33</sub> O <sub>3</sub> (-0.2)  | Carotenoid                      | No                                | Yes                                           | No                     | No                     | No                     |
| 613.3232 (-)                                                        | 18.0                 | 195, 264, 558           | C <sub>31</sub> H <sub>49</sub> O <sub>12</sub> (-0.4) | Hydroxycinnamic acid derivative | No                                | Yes                                           | No                     | No                     | No                     |

<sup>a</sup>Mass-to-charge ratio with positive (+) or negative (-) ionization modes indicated parenthetically. <sup>b</sup>Molecular formulas with error, in ppm, noted parenthetically. <sup>c</sup>Ground root of *Escobedia scabrifolia* reference. <sup>d</sup>Extracted with methanol at room temperature. <sup>e</sup>Extracted with BF<sub>3</sub> see main text for full method.



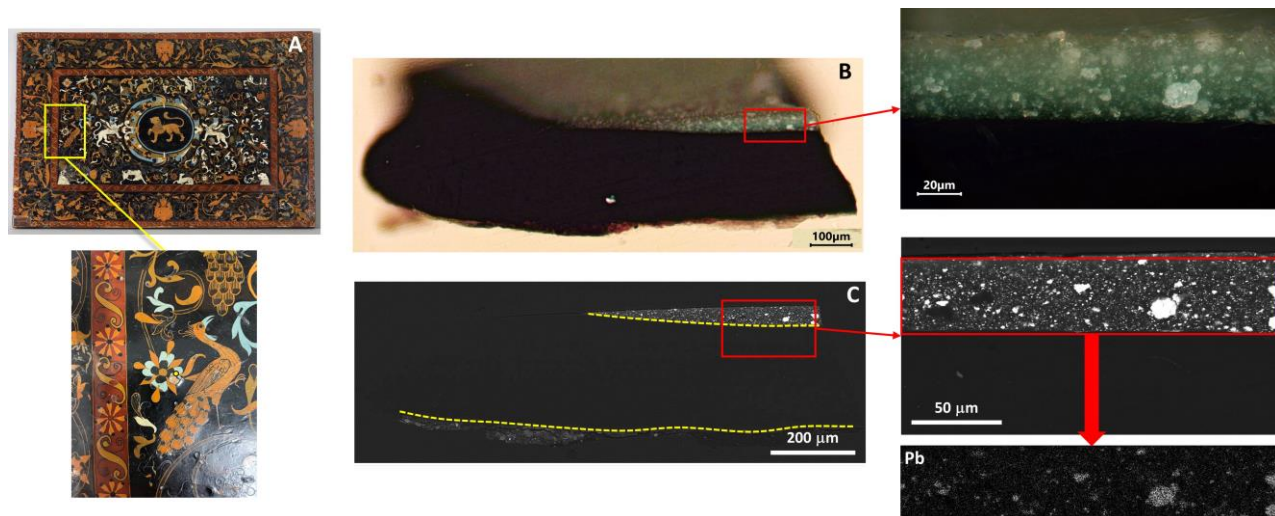

**Figure S14.** Cross section S1 removed from a light blue flower of the *Tabletop* LS2447. **A.** sampling location indicated by a filled yellow circle in the blown-up image; **B.** Micrograph of the cross section under polarizing light, with detail of the top light blue layer; **C.** BSE image of the cross section, with detail of the top layer and elemental map illustrating the distribution of lead in the layer.



# Material Suplementario S1

## **Objetos de *barniz de Pasto* del siglo XVII de la colección de la Hispanic Society Museum and Library: materialidad y tecnología**

Basso, E.\*,<sup>1</sup>, McGeachy, A.C.<sup>1</sup>, Mieites Alonso, M.G.<sup>1</sup>, Pozzi, F.<sup>2</sup>, Radpour, R.<sup>3</sup>, Katz, M.<sup>4</sup>

1. Department of Scientific Research, The Metropolitan Museum of Art, 1000 Fifth Avenue, New York, NY 10028, USA

2. Centro per la Conservazione ed il Restauro dei Beni Culturali “La Venaria Reale”, via XX Settembre 18, 10078 Venaria Reale (Turin), Italy

3. Department of Art Conservation, University of Delaware, 303 Old College, Newark, DE 19716, USA

4. Conservator Emerita, Hispanic Society Museum & Library, 613 W 155th Street, New York NY 10032, USA

\* Correspondencia: elena.basso@metmuseum.org

**Tabla S1.** Resumen de los objetos de *barniz de Pasto* estudiados en esta investigación.

| Objetos <sup>†</sup>                                                               | Nombre                 | Número de acceso | Fecha    | Técnica                                                                                          | Dimensiones (H cm × W cm × D cm) |
|------------------------------------------------------------------------------------|------------------------|------------------|----------|--------------------------------------------------------------------------------------------------|----------------------------------|
|    | <i>Arqueta</i>         | LS2361           | 1625-50  | <i>barniz de Pasto</i>                                                                           | 15 × 18 × 8.6                    |
|    | <i>Cofre</i>           | LS2067           | ca. 1650 | <i>barniz de Pasto</i> sobre madera con pan de plata y oro y monturas de plata                   | 19.2 × 26 × 12.3                 |
|    | <i>Tablero de mesa</i> | LS2447           | ca. 1643 | <i>barniz de Pasto</i> laca sobre cedro español ( <i>Cedrela odorata</i> )                       | 43.7 × 66 × 1.8                  |
|   | <i>Escritorio</i>      | LS2446           | ca. 1643 | <i>barniz de Pasto</i> laca sobre cedro español ( <i>Cedrela odorata</i> ) con monturas de plata | 20.2 × 39.4 × 35 (Serrado)       |
|  | <i>Escritorio</i>      | LS2000           | ca. 1684 | <i>barniz de Pasto</i> Laca sobre madera con pan de plata, herrajes modernos de metal amarillo   | 19 × 36 × 30.5                   |

<sup>†</sup> Imágenes cortesía de la Hispanic Society of America.

**Tabla S2.** Resumen del análisis py-GC/MS de la muestra S5 recogida a partir de resina incolora de LS2447.

| RT<br>[min] | [M+] | ID                                             | Match | RI   | Referencias relacionadas |
|-------------|------|------------------------------------------------|-------|------|--------------------------|
| 2.32        | 90   | Carbonic acid, dimethyl ester                  | 891   | 620  |                          |
| 2.50        | 120  | Dimethoxydimethylsilane                        | 922   | 645  |                          |
| 2.85        | 102  | Methyl isobutyrate?                            | 758   | 684  |                          |
| 3.9         | 152  | Tetramethyl silicate                           | 878   | 668  |                          |
| 4.5         | 222  | Cyclotrisiloxane, hexamethyl-                  | 860   | 851  |                          |
| 4.74        | 117  | Glycine, N,N-dimethyl-, methyl ester           | 937   | 911  |                          |
| 5.54        |      | N,N-dimethylalanine methyl ester?              |       |      | [32]                     |
| 6.48        | 142  | Isobutyl methacrylate?                         | 898   | 960  |                          |
| 6.60        |      | Unknown (m/z @ 86)                             |       |      |                          |
| 6.64        |      | Unknown (m/z @ 70, 129, 114, 55)               |       |      |                          |
| 7.14        | 296  | Cyclotetrasiloxane, octamethyl-                | 920   | 994  |                          |
| 9.22        |      | Unknown (m/z @ 58)                             |       |      |                          |
| 9.83        | 161  | Sarcosine, N-methoxycarbonyl-, methyl ester    | 847   | 1150 |                          |
| 10.45       | 175  | Unknown (m/z @ 58)                             |       |      |                          |
| 10.63       | 175  | Unknown (m/z @ 116)                            |       |      |                          |
| 10.69       | 189  | Unknown (m/z @ 58)                             |       |      |                          |
| 10.89       | 189  | L-aspartic acid, N,N-dimethyl-, dimethyl ester | 840   | 1234 |                          |
| 11.15       | 189  | Unknown (m/z @ 72)                             |       |      |                          |
| 11.3        |      | Unknown (m/z @ 72)                             |       |      |                          |
| 13.05       |      | Unknown (m/z @ 88, 87, 122, 169)               |       |      |                          |
| 13.29       |      |                                                |       |      |                          |
| 13.82       | 216  | Unknown (m/z @ 185, 157)                       |       |      |                          |
| 14.04       | 194  | Dimethyl phthalate                             | 793   | 1454 |                          |
| 14.12       |      | Unknown (m/z @ 128)                            |       |      |                          |
| 14.94       | 214  | Lauric acid, methyl ester                      | 688   | 1526 |                          |
| 17.26       | 242  | Myristic acid, methyl ester                    | 648   | 1725 |                          |
| 18.02       |      |                                                |       |      |                          |
| 18.73       |      |                                                |       |      |                          |
| 19.37       | 270  | Palmitic acid, methyl ester                    | 872   | 1926 |                          |
| 19.69       | 278  | Dibutyl phthalate?                             | 798   | 1965 |                          |
| 21.29       | 284  | Stearic acid, methyl ester                     | 864   | 2128 |                          |
| 22.9        |      |                                                |       |      |                          |
| 23.67       | 464  | Tetracosane                                    | 723   | 2400 |                          |
| 24.47       | 352  | Pentacosane                                    | 849   | 2500 |                          |
| 25.25       | 366  | Hexacosane                                     | 818   | 2600 |                          |
| 25.89       | 380  | Heptacosane                                    | 775   | 2700 |                          |
| 26.2        | 382  | Tetracosanoic acid, methyl ester               | 484   | 2730 |                          |
| 26.71       | 394  | Octacosane                                     | 732   | 2800 |                          |
| 27.4        | 408  | Nonacosane                                     | 737   | 2900 |                          |
| 28.07       | 422  | Triacontane                                    | 662   | 3000 |                          |
| 28.72       | 436  | Hentriacontane                                 | 602   | 3100 |                          |
| 29.35       | 450  | Dotriacontane                                  | 573   | 3200 |                          |
| 30.81       | 464  | Trtriacontane                                  | 425   | 3300 |                          |
| 31.71       | 478  | Tetratriacontane?                              |       | 3400 |                          |

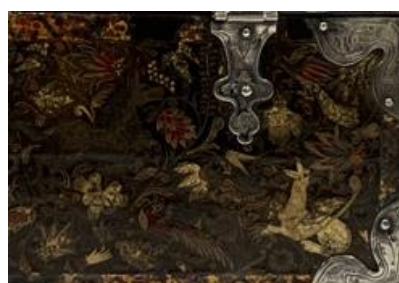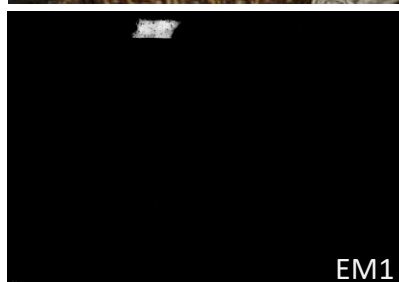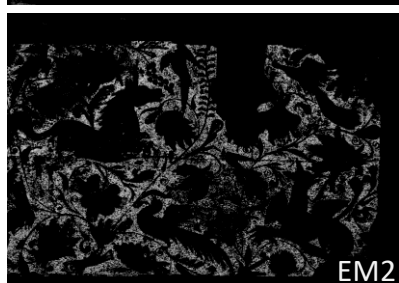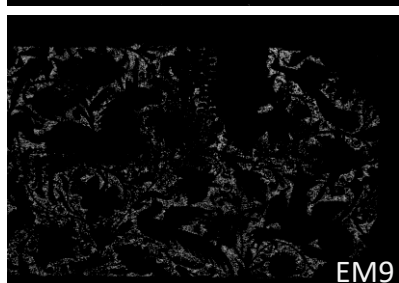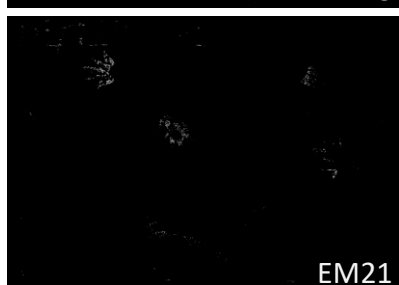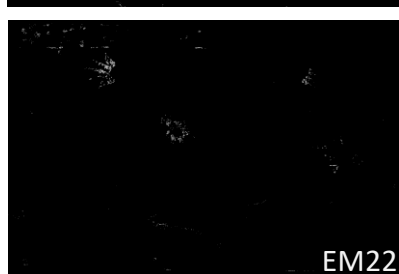

Reflectance [a.u]

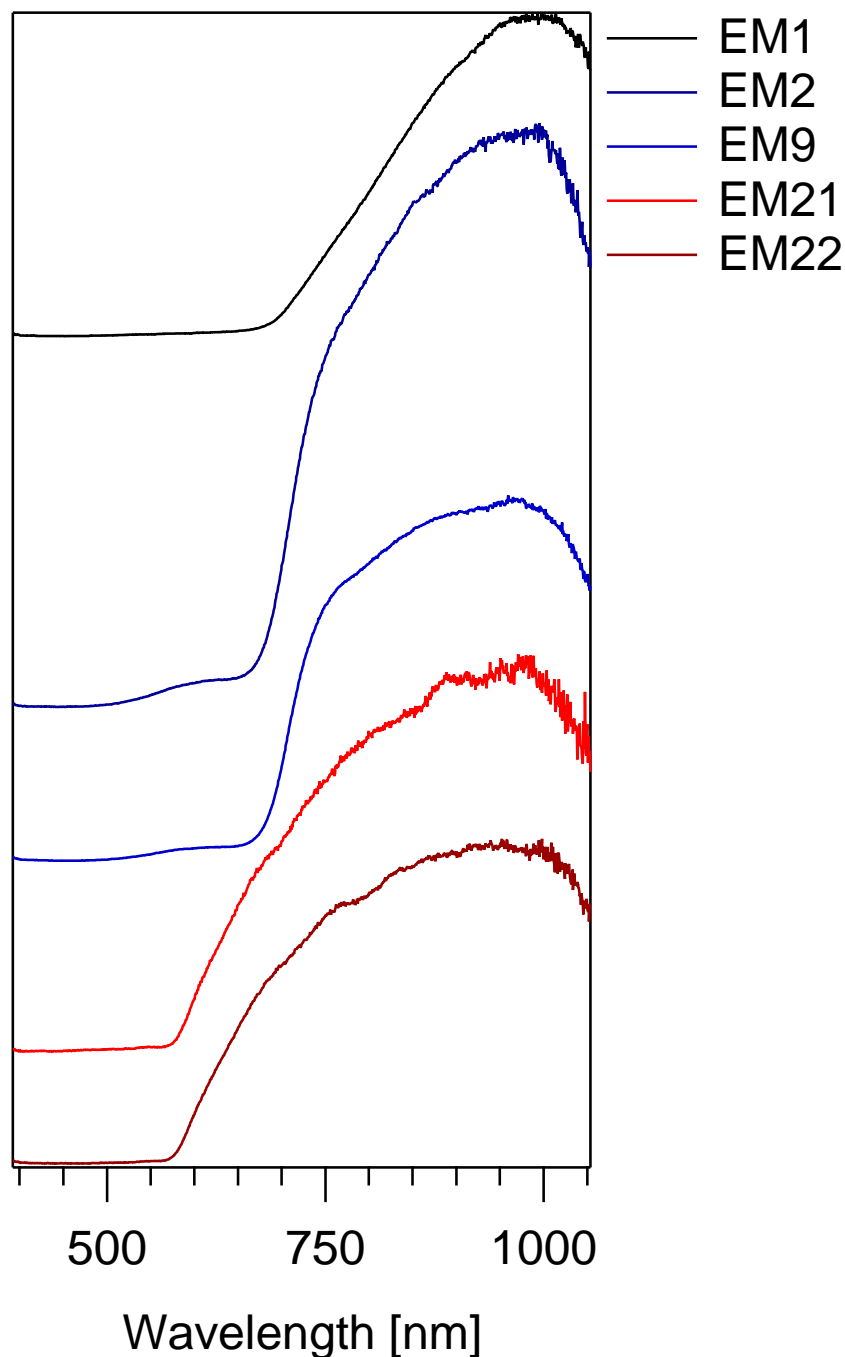

**Figura S1. (Izquierda, de arriba a abajo)** Área visible inspeccionada por imágenes RIS (arriba a la izquierda) y un subconjunto de imágenes de reglas de miembro final (EM) correspondientes (mapas de distribución). (Derecha) Subconjunto de espectros de miembro final RIS para el panel posterior del cofre LS2067. Desplazamiento para mayor claridad.

**Tabla S3.** Subconjunto de datos de imágenes de reflectancia para el panel frontal del *Cofre* LS2067.<sup>†</sup>

| EM | Características de absorción [nm] | Punto de inflexión (es) [nm] | Designación        | Color aparente |
|----|-----------------------------------|------------------------------|--------------------|----------------|
| 1  |                                   |                              | Indigo?            | Negro          |
| 2  | 452                               | 713                          | Indigo + Amarillo? | Negro?         |
| 9  | 460                               | 712                          | Indigo + Amarillo? | Negro?         |
| 21 |                                   | 615                          |                    | Rojo           |
| 22 |                                   | 610                          |                    | Rojo           |

<sup>†</sup>Aquí solo se presentan los miembros finales más informativos. Se descartan los miembros finales correspondientes al ruido, las aristas u otros artefactos.



**Figura S2.** Subconjunto de imágenes de regla de miembro final (EM) (mapas de distribución) para la tapa interior del *Escritorio* LS2000.



**Figura S3.** Subconjunto de espectros de miembros finales RIS para la tapa interior del *Escritorio* LS2000. Contrarrestados para mayor claridad.

**Tabla S4.** Subconjunto de datos de imágenes de reflectancia para la tapa interior del *Escritorio* LS2000.<sup>†</sup>

| EM | Características de absorción [nm] | Punto de inflexión (es) [nm] | Designación                    | Color aparente |
|----|-----------------------------------|------------------------------|--------------------------------|----------------|
| 1  |                                   | 719                          | Indigo                         | Negro          |
| 2  | 649                               | 706                          | Indigo                         | Azul oscuro    |
| 3  |                                   | 709                          | Indigo                         | Negro          |
| 4  | 521, 560, 655                     | 583, 698                     | Indigo + Cochinilla?           | Granate        |
| 5  | 523, 562, 654                     | 586                          | Indigo + Cochinilla            | Rosa           |
| 6  | 522, 560                          |                              | Cochinilla + ?                 | Marrón         |
| 7  | 522, 562                          | 590                          | Cochinilla                     | Rojo           |
| 8  | 648                               | 706                          | Indigo                         | Azul           |
| 9  |                                   | 590                          |                                | Rojo           |
| 10 |                                   | 588                          |                                | Rojo           |
| 13 | 408                               | 699                          | Indigo + Amarillo              | Verde          |
| 15 | 642                               | 695                          |                                | Azul claro     |
| 16 | 436                               |                              |                                | Naranja        |
| 18 | 401                               | 575                          | Rojo desconocido +<br>Amarillo | Naranja        |
| 19 | 523, 560, 656                     |                              | Indigo + Cochinilla            |                |
| 21 | 519, 561, 651                     | 699                          | Indigo +Cochinilla             | Granate        |
| 22 | 522, 564                          | 589                          |                                | Rojo           |
| 23 | 520, 564, 652                     | 699                          |                                | Granate        |
| 26 | 523, 560                          |                              | Cochinilla                     | Rosa oscuro    |
| 27 | 519, 559                          |                              | Cochinilla                     | Rosa claro     |
| 28 | 521, 564                          | 595                          | Cochinilla                     | Rojo           |

<sup>†</sup>Aquí solo se presentan los miembros finales más informativos. Se descartan los miembros finales correspondientes al ruido, las aristas u otros artefactos.



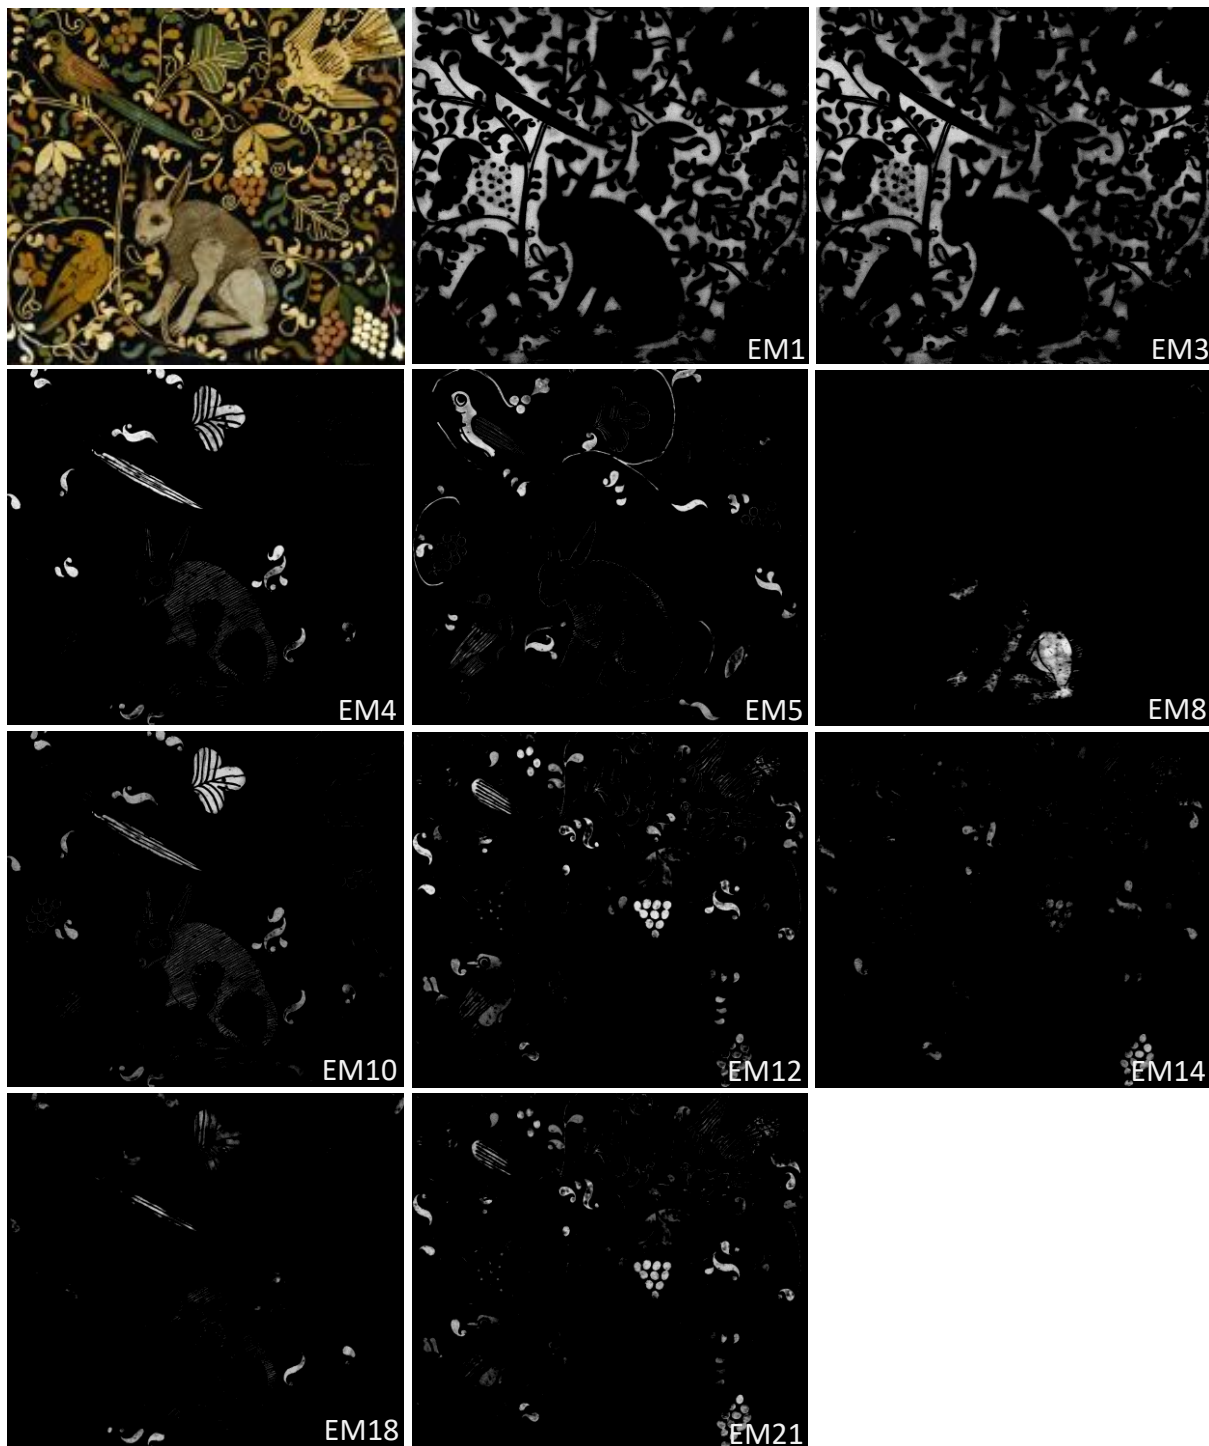

**Figura S4.** Área visible estudiada por imágenes de la RIS (arriba a la izquierda) y un subconjunto de las correspondientes imágenes de la regla del miembro final de la RIS (EM) (mapas de distribución) para el panel lateral de la *Arqueta* LS2361 con ilustración de liebre.



**Figura S5.** Subconjunto de espectros de miembros finales RIS para el panel lateral de la *Arqueta* LS2361 con liebre. Contrarrestados para mayor claridad.

**Tabla S5.** Subconjunto de datos de imágenes de reflectancia para el panel lateral de la *Arqueta* LS2361 con liebre.<sup>†</sup>

| EM | Características de absorción [nm] | Punto de inflexión (es) [nm] | Designación        | Color aparente     |
|----|-----------------------------------|------------------------------|--------------------|--------------------|
| 1  |                                   | 759                          | Indigo             | Negro              |
| 3  |                                   | 757                          | Indigo             | Negro              |
| 4  | 649                               | 713                          | Indigo?            | Blue green         |
| 5  | 412, 645                          | 704                          | Indigo + Amarillo? | Verde oliva oscuro |
| 8  | 651                               | 703                          | Indigo             | Azul empolvado     |
| 10 | 652                               | 709                          | Indigo + Amarillo? | Verde azul         |
| 12 | 524, 560                          |                              | Cochinilla         | Rosa melocotón     |
| 14 | 523, 555                          | 586                          | Cochinilla         | Rosa melocotón     |
| 18 |                                   | 712                          | Indigo +Amarillo?  | Verde azul         |
| 21 | 524, 552                          |                              | Cochinilla         | Rosa melocotón     |

<sup>†</sup>Aquí solo se presentan los miembros finales más informativos. Se descartan los miembros finales correspondientes al ruido, las aristas u otros artefactos.



**Figura S6.** Área visible inspeccionada por imágenes RIS (arriba a la izquierda) y un subconjunto de imágenes de regla de miembro final (EM) correspondientes (mapas de distribución) para el panel frontal de la *Arqueta* LS2361.



**Figura S7.** Subconjunto de espectros de miembros finales RIS para el panel frontal de la *Arqueta* LS2361. Contrarrestados para mayor claridad.

**Tabla S6.** Subconjunto de datos de imágenes de reflectancia para el panel frontal de la *Arqueta* LS2361.<sup>†</sup>

| EM | Características de absorción [nm] | Punto de inflexión (es) [nm] | Designación        | Color aparente |
|----|-----------------------------------|------------------------------|--------------------|----------------|
| 1  | 647                               | 704                          | Indigo + Amarillo? | Azul           |
| 4  |                                   | 745                          | Indigo             | Negro          |
| 6  | 649                               | 705                          | Indigo + Amarillo? | Verde azul     |
| 7  | 645                               | 707                          | Indigo + Amarillo? | Verde azul     |
| 10 |                                   | 585                          |                    | Rosa fuerte    |
| 11 |                                   | 583                          |                    | Rosa fuerte    |
| 14 | 427                               |                              |                    |                |
| 15 | 653                               | 707                          |                    |                |
| 18 |                                   | 585                          |                    | Rosa fuerte    |
| 30 | 524, 564                          |                              | Cochinilla?        | Rosa melocotón |
| 34 | 520, 562                          |                              | Cochinilla         | Rosa melocotón |
| 35 |                                   |                              |                    | Rosa melocotón |
| 37 | 421                               | 693                          |                    | Verde oliva    |

<sup>†</sup>Aquí solo se presentan los miembros finales más informativos. Se descartan los miembros finales correspondientes al ruido, las aristas u otros artefactos.



**Figura S8.** Imagen visible del área inspeccionada por imágenes RIS (arriba a la izquierda) y un subconjunto de imágenes de reglas de miembros finales (EM) correspondientes (mapas de distribución) para el panel lateral de la *Arqueta* LS2361 con ilustración del lobo.

**Table S7.** Subconjunto de datos de imágenes de reflectancia el panel lateral de la *Arqueta* LS2361 con ilustración del lobo.<sup>†</sup>

| EM | Características de absorción [nm] | Punto de inflexión (es) [nm] | Designación            | Color aparente |
|----|-----------------------------------|------------------------------|------------------------|----------------|
| 2  |                                   | 747                          | Indigo                 | Negro          |
| 3  |                                   | 753                          | Indigo                 | Negro          |
| 4  | 561, 645                          | 705                          | Indigo + Cochinilla?   | Azul púrpura   |
| 5  | 518, 560, 644                     | 706                          | Indigo + Cochinilla    | Azul púrpura   |
| 6  |                                   | 749                          | Indigo                 | Negro          |
| 7  | 400, 653                          | 713                          | Indigo + Amarillo      | Verde azul     |
| 8  | 470                               |                              |                        | Red            |
| 9  | 560                               |                              | Cochinilla?            | Peach Pink     |
| 11 | 398, 653                          | 711                          | Indigo + Amarillo      | Verde azul     |
| 12 | 395                               |                              |                        | Blanco crudo   |
| 13 | 413, 643                          | 695                          | Indigo + Amarillo      | Verde          |
| 14 |                                   | 751                          | Indigo                 | Negro          |
| 15 | 416                               |                              | Amarillo?              | Naranja        |
| 16 |                                   | 747                          | Indigo                 | Negro          |
| 18 | 483                               |                              |                        | Rojo           |
| 19 |                                   | 748                          | Indigo                 | Negro          |
| 21 | 564?                              |                              | Amarillo + Cochinilla? | Peach Pink     |
| 27 | 416                               |                              |                        | Orange         |
| 30 |                                   |                              |                        | Off White      |
| 31 | 415                               |                              |                        | Orange         |
| 32 | 393, 566                          |                              | Amarillo + Cochinilla? | Rosa melocotón |
| 33 |                                   | 745                          | Indigo                 | Negro          |
| 34 | 521, 562, 640                     | 706                          | Indigo + Cochinilla    | Azul púrpura   |

<sup>†</sup>Aquí solo se presentan los miembros finales más informativos. Se descartan los miembros finales correspondientes al ruido, las aristas u otros artefactos.





**Figura S9.** Subconjunto de espectros de miembros finales RIS para el panel lateral del *Escritorio* LS2446 con lobo. Contrarrestados para mayor claridad.



**Figura S10.** Imagen compuesta en color real del área inspeccionada por imágenes RIS (arriba a la izquierda) y un subconjunto de imágenes de regla de miembro final (EM) RIS correspondientes (mapas de distribución) para el panel lateral exterior del *Escritorio* LS2446 con ilustración de grifo.

**Tabla S8.** Subconjunto de datos de imágenes de reflectancia para el panel lateral del *Escritorio* LS2446.<sup>†</sup>

| EM | Características de absorción [nm] | Punto de inflexión (es) [nm] | Designación       | Color aparente   |
|----|-----------------------------------|------------------------------|-------------------|------------------|
| 1  |                                   | 755                          | Indigo?           | Negro            |
| 2  | 644                               | 734                          | Indigo            | Azul oscuro      |
| 3  | 517                               |                              |                   | Rojo             |
| 5  | 635                               | 725                          | Indigo            | Azul oscuro      |
| 6  | 412, 635                          | 714                          | Indigo + Amarillo | Verde azul       |
| 7  | 397                               | 719                          | Indigo + Amarillo | Verde azul       |
| 8  | 414, 652                          |                              | Indigo + Amarillo | Verde azul       |
| 10 | 406, 653                          | 719                          | Indigo + Amarillo | Verde azul       |
| 11 | 409                               |                              |                   | Amarillo/Naranja |
| 12 |                                   | 736                          | Indigo            | Azul oscuro      |
| 13 | 421, 653                          | 718                          | Indigo + Amarillo | Verde azul       |
| 15 | 411                               |                              |                   | Amarillo         |
| 18 |                                   | 752                          |                   | Black            |
| 21 |                                   | 746                          | Indigo            | Black            |
| 22 |                                   |                              |                   | Rojo             |
| 23 | 407                               | 714                          | Indigo + Amarillo | Verde azul       |
| 24 | 425                               |                              |                   | Amarillo/Naranja |
| 27 | 411, 645                          | 712                          | Indigo + Amarillo | Verde azul       |
| 28 | 406, 645                          | 712                          | Indigo + Amarillo | Verde azul       |
| 29 | 412, 642                          | 711                          | Indigo + Amarillo | Verde azul       |
| 30 | 631                               | 729                          | Indigo            | Azul oscuro      |

<sup>†</sup>Aquí solo se presentan los miembros finales más informativos. Se descartan los miembros finales correspondientes al ruido, las aristas u otros artefactos.



**Figura S11.** Subconjunto de espectros de miembros finales RIS para el panel lateral del *Escritorio* LS2446. Contrarrestados para mayor claridad.

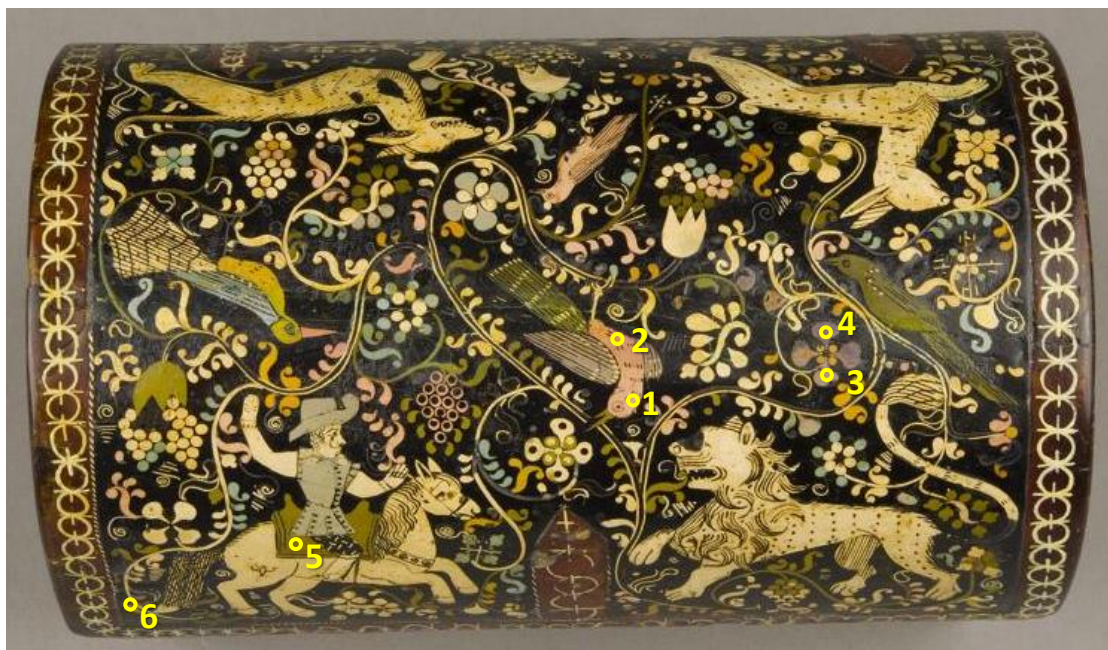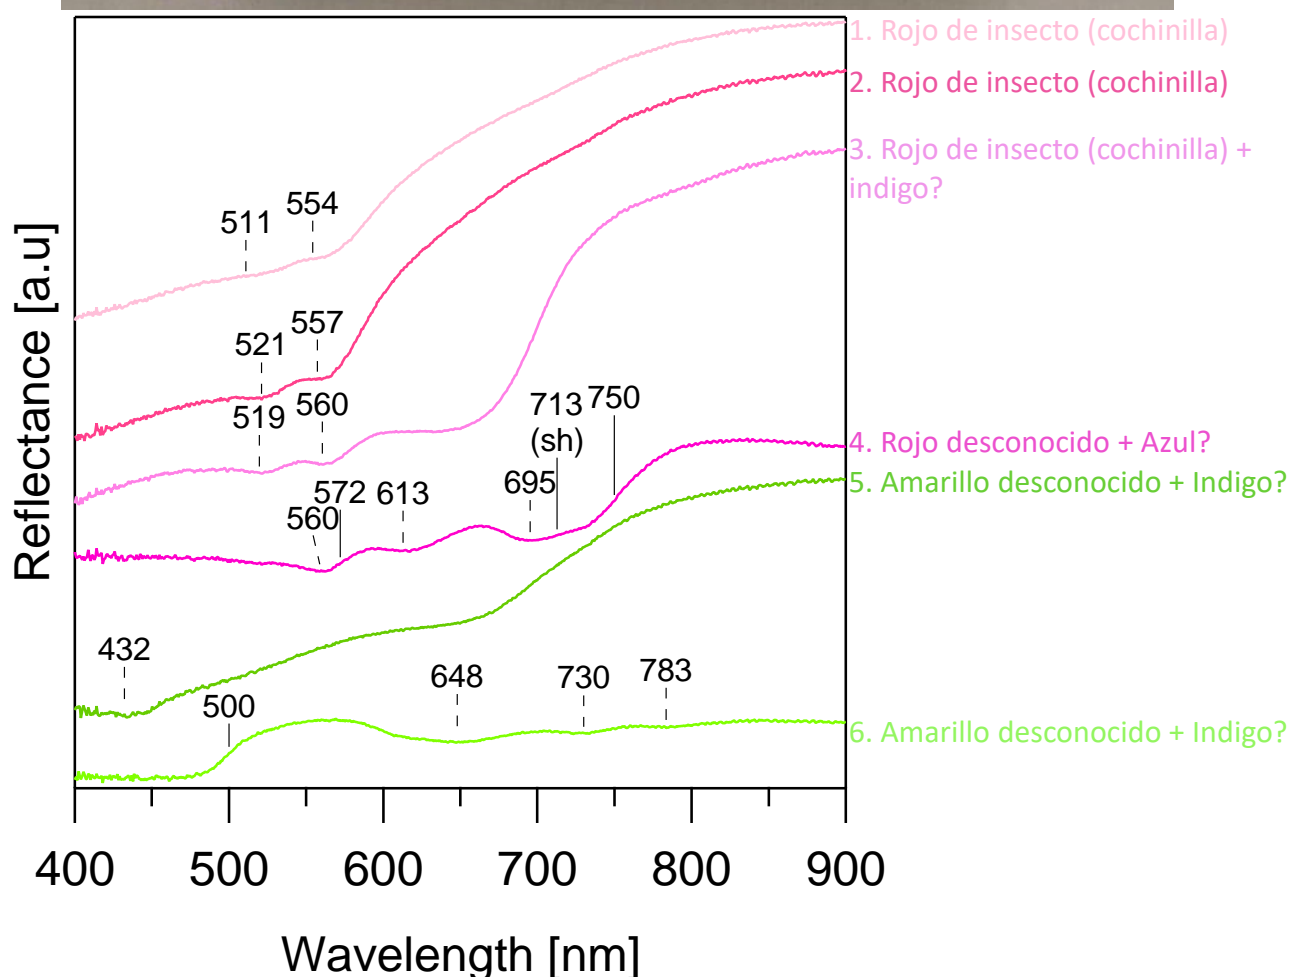

**Figura S12. (Arriba)** Vista de arriba hacia abajo de la tapa de la *Arqueta* LS2361 con ubicaciones aproximadas de los análisis FORS indicadas por círculos abiertos y anotadas con el número de posición. **(Abajo)** Espectros FORS recopilados de la tapa de la *Arqueta* LS2361 con el número de ubicación correspondiente y la identificación proporcionada a la derecha del gráfico. Los puntos de inflexión se indican con líneas continuas, mientras que las características de absorción aparente se indican con líneas discontinuas. Espectros se compensan para mayor claridad.



**Figura S13.** Comparación de los espectros FTIR de la muestra S2 recolectada de un área naranja en el *Tablero de mesa* LS2447 (espectro naranja, corregido en la línea de base) y referencia de la biblioteca para la corteza de quercitrón (espectro gris).

**Tabla S9.** Resumen de los compuestos identificados en el análisis LC/MS de *E. scabrifolia* y comparación de los compuestos identificados en la raíz de *E. scabrifolia* y las muestras recogidas en el *Tablero de mesa* LS2447.

| Compounds detected by LC-MS analysis of Escobedia Scabrifolia roots |                         |                         |                                                        | Presence in other samples       |                                              |                                                         |                        |                        |                        |
|---------------------------------------------------------------------|-------------------------|-------------------------|--------------------------------------------------------|---------------------------------|----------------------------------------------|---------------------------------------------------------|------------------------|------------------------|------------------------|
| m/z <sup>a</sup>                                                    | Retention Time<br>[min] | UV-Vis Signals<br>[nm]  | Molecular Formula <sup>b</sup>                         | Detected compound               |                                              |                                                         |                        |                        |                        |
|                                                                     |                         |                         |                                                        |                                 | <i>E. Scabrifolia</i><br>MeOH <sup>c,d</sup> | <i>E. Scabrifolia</i><br>BF <sub>3</sub> <sup>c,e</sup> | LS2447 S2 <sup>e</sup> | LS2447_S3 <sup>d</sup> | LS2447_S5 <sup>d</sup> |
| 401.2682 (+)                                                        | 25.6                    | 195, 218, 416           | C <sub>25</sub> H <sub>37</sub> O <sub>4</sub> (1.0)   | Aeginetin                       | Yes                                          | No                                                      | No                     | No                     | No                     |
| 399.2541 (-)                                                        | 25.6                    | 195, 218, 416           | C <sub>25</sub> H <sub>35</sub> O <sub>4</sub> (0.0)   | Aeginetin                       | Yes                                          | No                                                      | No                     | No                     | No                     |
| 425.2689 (-)                                                        | 26.6                    | 242, 417                | C <sub>27</sub> H <sub>37</sub> O <sub>4</sub> (0.0)   | Azafrin                         | Yes                                          | No                                                      | No                     | No                     | No                     |
| 427.2844 (+)                                                        | 26.5                    | 242, 417                | C <sub>27</sub> H <sub>39</sub> O <sub>4</sub> (0.8)   | Azafrin                         | Yes                                          | No                                                      | No                     | No                     | No                     |
| 449.1098 (+)                                                        | 8.1                     | 191, 211                | C <sub>21</sub> H <sub>21</sub> O <sub>11</sub> (-4.5) | Unknown                         | No                                           | Yes                                                     | No                     | No                     | No                     |
| 447.0957 (-)                                                        | 8.0                     | 190, 207, 310           | C <sub>21</sub> H <sub>19</sub> O <sub>11</sub> (-4.8) | Flavonoid                       | No                                           | Yes                                                     | No                     | No                     | No                     |
| 449.2037 (-)                                                        | 7.0                     | 232                     | C <sub>20</sub> H <sub>33</sub> O <sub>11</sub> (-0.3) | Unknown                         | Yes                                          | Yes                                                     | No                     | No                     | No                     |
| 809.4158 (+)                                                        | 7.1                     | 232                     | C <sub>38</sub> H <sub>65</sub> O <sub>18</sub> (0.9)  | Unknown                         | Yes                                          | Yes                                                     | No                     | No                     | No                     |
| 611.2559 (-)                                                        | 8.2                     | N/A                     | C <sub>28</sub> H <sub>44</sub> O <sub>16</sub> (0.0)  | Unknown                         | Yes                                          | Yes                                                     | No                     | No                     | No                     |
| 387.2168(-)                                                         | 10.8                    | 190, 198, 238, 305, 425 | C <sub>19</sub> H <sub>33</sub> O <sub>8</sub> (0.2)   | Polyphenol                      | No                                           | Yes                                                     | No                     | No                     | No                     |
| 491.2498 (-)                                                        | 10.0                    | 190, 198, 238, 305, 425 | C <sub>23</sub> H <sub>39</sub> O <sub>11</sub> (0.1)  | Anthocyanin                     | Yes                                          | Yes                                                     | No                     | No                     | No                     |
| 381.2425 (+)                                                        | 17                      | 193, 216                | C <sub>25</sub> H <sub>33</sub> O <sub>3</sub> (-0.2)  | Carotenoid                      | No                                           | Yes                                                     | No                     | No                     | No                     |
| 613.3232 (-)                                                        | 18.0                    | 195, 264, 558           | C <sub>31</sub> H <sub>49</sub> O <sub>12</sub> (-0.4) | Hydroxycinnamic acid derivative | No                                           | Yes                                                     | No                     | No                     | No                     |

<sup>a</sup>Mass-to-charge ratio with positive (+) or negative (-) ionization modes indicated parenthetically. <sup>b</sup>Molecular formulas with error, in ppm, noted parenthetically. <sup>c</sup>Ground root of *Escobedia scabrifolia* reference. <sup>d</sup>Extracted with methanol at room temperature. <sup>e</sup>Extracted with BF<sub>3</sub> see main text for full method.



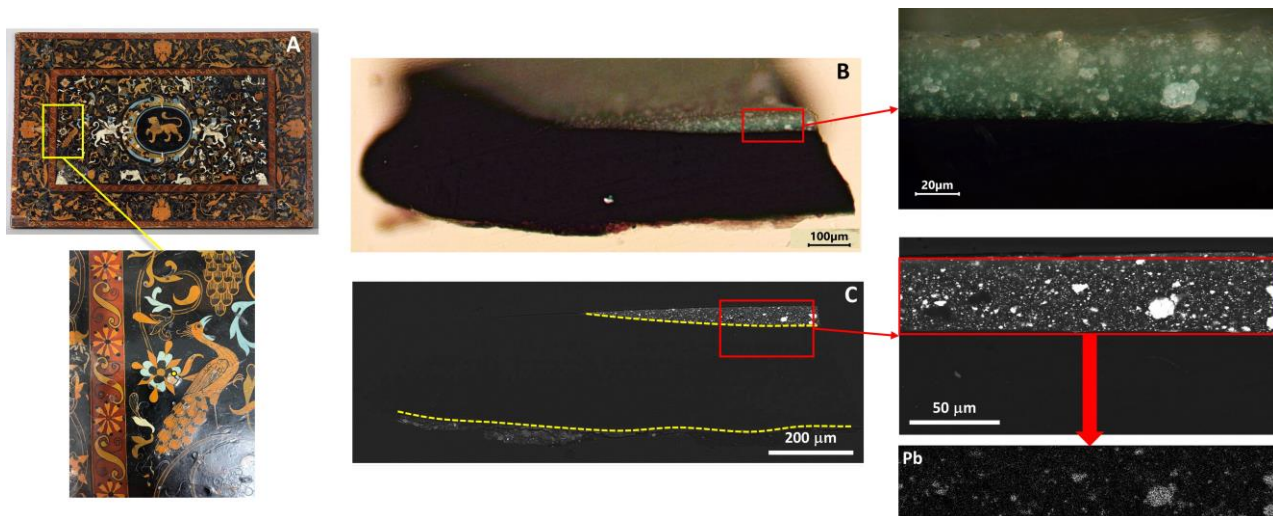

**Figura S14.** Sección transversal S1 extraída de una flor azul claro del *Tablero de mesa* LS2447. **A.** El lugar de muestreo indicado por un círculo amarillo relleno en la imagen ampliada; **B.** Micrografía de la sección transversal bajo luz polarizada, con detalle de la capa superior de color azul claro; **C.** Imagen de la sección transversal de la EEB, con detalle de la capa superior y mapa elemental que ilustra la distribución del plomo en la capa.
